# Supplementary material for: Isonitrile μ2-carbido complexes
Source: Royal Society of Chemistry journal article supplement (doi:10.1039/d3dt02649c), 2023-01-01

ELECTRONIC SUPPORTING INFORMATION

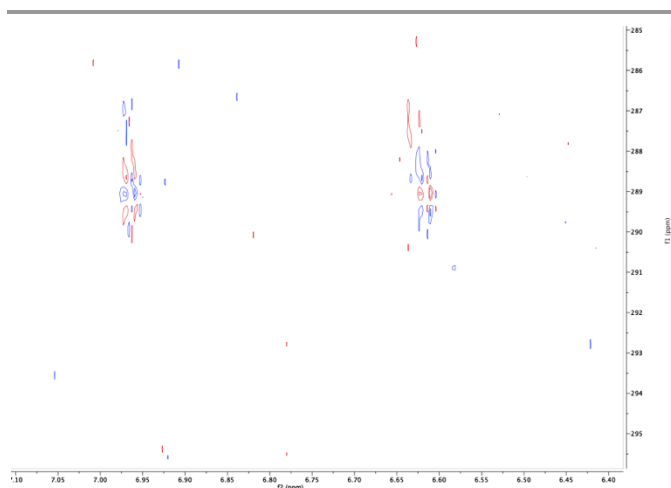

**Figure S1.**  $^{13}\text{C}$ - $^1\text{H}$  HSQC NMR spectrum (400-151 MHz,  $\text{C}_6\text{D}_6$ , 25 °C) extract showing correlation ( $^2J_{\text{CH}}$ ) between the carbido resonance and those of the  $\text{H}^4(\text{pz})$  methine protons.

## Optimised Geometries and Cartesian Coordinates

[DFT:ωB97X-D/6-31G\*/LANL2DZ]

**[PtH(CNH)<sub>3</sub>]<sup>+</sup>**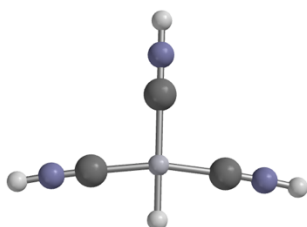Figure S2: Optimised structure of [PtH(CNH)<sub>3</sub>]<sup>+</sup> in the gas phase.Table S1: Cartesian coordinates for [PtH(CNH)<sub>3</sub>]<sup>+</sup>

| Atom | x         | y        | z         |
|------|-----------|----------|-----------|
| Pt   | 0.001595  | 0.000000 | 0.506381  |
| H    | 0.001209  | 0.000000 | 2.110918  |
| C    | -1.952619 | 0.000000 | 0.717441  |
| C    | 1.955913  | 0.000000 | 0.719244  |
| C    | -0.000841 | 0.000000 | -1.550189 |
| N    | 3.100280  | 0.000000 | 0.887687  |
| N    | -3.097216 | 0.000000 | 0.883820  |
| N    | -0.003926 | 0.000000 | -2.708462 |
| H    | -4.083273 | 0.000000 | 1.068592  |
| H    | 4.085556  | 0.000000 | 1.076451  |
| H    | -0.006677 | 0.000000 | -3.711884 |

Table S2: Thermodynamic properties at 298.15 °K

|                          |             |         |                                                |
|--------------------------|-------------|---------|------------------------------------------------|
| Zero Point Energy :      | 164.60      | kJ/mol  | (ZPE)                                          |
| Temperature Correction : | 25.78       | kJ/mol  | (vibration + gas law + rotation + translation) |
| Enthalpy Correction :    | 190.38      | kJ/mol  | (ZPE + temperature correction)                 |
| Enthalpy :               | -399.688494 | au      | (Electronic Energy + Enthalpy Correction)      |
| Entropy :                | 386.65      | J/mol•K |                                                |
| Gibbs Energy :           | -399.732402 | au      | (Enthalpy - T*Entropy)                         |
| C <sub>v</sub> :         | 144.24      | J/mol•K |                                                |

**[Pt(CH<sub>2</sub>CH<sub>3</sub>)(CNH)<sub>3</sub>]<sup>+</sup>**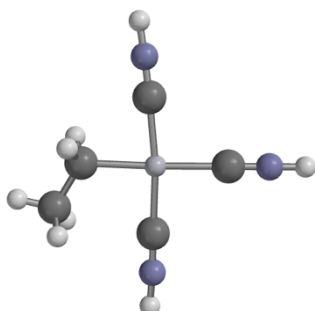Figure S3: Optimised structure of [Pt(CH<sub>2</sub>CH<sub>3</sub>)(CNH)<sub>3</sub>]<sup>+</sup> in the gas phase.Table S3: Cartesian coordinates for [PtH(CNH)<sub>3</sub>]<sup>+</sup>

| Atom | x         | y         | z         |
|------|-----------|-----------|-----------|
| Pt   | -0.281038 | 0.000000  | -0.636140 |
| C    | -2.242739 | 0.000000  | -0.428086 |
| C    | 1.682411  | -0.000000 | -0.609482 |
| C    | -0.338961 | -0.000000 | -2.700540 |
| N    | 2.839976  | 0.000000  | -0.609842 |
| N    | -3.389112 | 0.000000  | -0.268551 |
| N    | -0.366908 | 0.000000  | -3.859817 |
| H    | -4.378824 | -0.000000 | -0.106991 |
| H    | 3.841054  | 0.000000  | -0.556543 |
| H    | -0.394932 | -0.000000 | -4.862381 |
| C    | -0.299693 | 0.000000  | 1.482927  |
| H    | -0.884053 | -0.881761 | 1.769868  |
| H    | -0.884053 | 0.881761  | 1.769868  |
| C    | 1.024222  | -0.000000 | 2.242522  |
| H    | 1.624942  | -0.889354 | 2.026831  |
| H    | 0.822767  | 0.000000  | 3.319524  |
| H    | 1.624942  | 0.889353  | 2.026831  |

Table S4: Thermodynamic properties at 298.15 °K

|                          |             |         |                                                |
|--------------------------|-------------|---------|------------------------------------------------|
| Zero Point Energy :      | 308.57      | kJ/mol  | (ZPE)                                          |
| Temperature Correction : | 32.66       | kJ/mol  | (vibration + gas law + rotation + translation) |
| Enthalpy Correction :    | 341.22      | kJ/mol  | (ZPE + temperature correction)                 |
| Enthalpy :               | -478.231287 | au      | (Electronic Energy + Enthalpy Correction)      |
| Entropy :                | 433.29      | J/mol•K |                                                |
| Gibbs Energy :           | -478.280491 | au      | (Enthalpy - T*Entropy)                         |
| C <sub>v</sub> :         | 194.55      | J/mol•K |                                                |

**[Pt(CH=CH<sub>2</sub>)(CNH)<sub>3</sub>]<sup>+</sup>**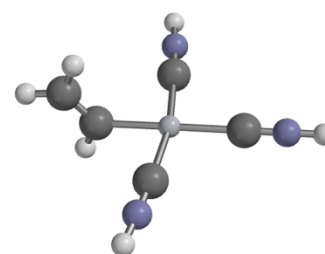Figure S4: Optimised structure of [Pt(CH=CH<sub>2</sub>)(CNH)<sub>3</sub>]<sup>+</sup> in the gas phase.

**Table S5:** Cartesian coordinates for  $[\text{Pt}(\text{CH}=\text{CH}_2)(\text{CNH}_3)]^+$ 

| Atom | x         | y         | z         |
|------|-----------|-----------|-----------|
| Pt   | -0.025149 | 0.214939  | -0.423445 |
| C    | -1.982595 | 0.190909  | -0.177219 |
| C    | 1.941286  | 0.204753  | -0.295141 |
| C    | -0.088152 | 0.199200  | -2.479162 |
| N    | 3.092151  | 0.191936  | -0.179766 |
| N    | -3.124416 | 0.170242  | 0.007611  |
| N    | -0.121700 | 0.188656  | -3.637460 |
| H    | -4.104782 | 0.147720  | 0.217902  |
| H    | 4.083309  | 0.178162  | -0.028317 |
| H    | -0.145305 | 0.178705  | -4.640331 |
| C    | 0.041181  | 0.255326  | 1.634139  |
| H    | -0.010319 | 1.251253  | 2.074493  |
| C    | 0.122542  | -0.819444 | 2.411770  |
| H    | 0.178145  | -1.832052 | 2.019816  |
| H    | 0.143804  | -0.720305 | 3.495110  |

**Table S6:** Thermodynamic properties at 298.15 °K

|                          |             |         |                                                |
|--------------------------|-------------|---------|------------------------------------------------|
| Zero Point Energy :      | 248.52      | kJ/mol  | (ZPE)                                          |
| Temperature Correction : | 31.60       | kJ/mol  | (vibration + gas law + rotation + translation) |
| Enthalpy Correction :    | 280.12      | kJ/mol  | (ZPE + temperature correction)                 |
| Enthalpy :               | -477.016136 | au      | (Electronic Energy + Enthalpy Correction)      |
| Entropy :                | 427.17      | J/mol·K |                                                |
| Gibbs Energy :           | -477.064646 | au      | (Enthalpy - T*Entropy)                         |
| $C_v$ :                  | 187.05      | J/mol·K |                                                |

 **$[\text{Pt}(\text{CCH})(\text{CNH}_3)]^+$** 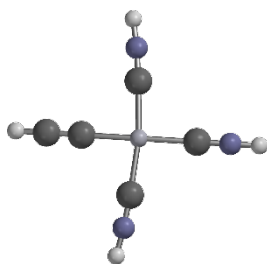**Figure S5:** Optimised structure of  $[\text{Pt}(\text{CCH})(\text{CNH}_3)]^+$  in the gas phase.**Table S7:** Cartesian coordinates for  $[\text{Pt}(\text{CCH})(\text{CNH}_3)]^+$ 

| Atom | X         | Y         | Z         |
|------|-----------|-----------|-----------|
| Pt   | 0.000109  | -0.000903 | 0.147517  |
| C    | 0.004706  | -0.001146 | -1.833234 |
| C    | -1.968985 | 0.002953  | -0.010909 |
| C    | 1.969928  | -0.004381 | -0.001393 |
| C    | -0.005347 | 0.000889  | 2.168635  |
| C    | 0.00715   | -0.000752 | -3.044    |
| H    | 0.009277  | -0.000212 | -4.112358 |
| N    | 3.116084  | -0.006888 | -0.140832 |
| N    | -3.114365 | 0.005307  | -0.156689 |
| N    | -0.008971 | 0.002533  | 3.326169  |
| H    | -4.099601 | 0.007001  | -0.34675  |
| H    | 4.102342  | -0.008786 | -0.325865 |
| H    | -0.012329 | 0.004385  | 4.329708  |

**Table S8:** Thermodynamic properties at 298.15 °K

|                         |             |         |                                               |
|-------------------------|-------------|---------|-----------------------------------------------|
| Zero Point Energy:      | 192.31      | kJ/mol  | (ZPE)                                         |
| Temperature Correction: | 30.56       | kJ/mol  | (vibration+ gas law + rotation + translation) |
| Enthalpy Correction:    | 222.87      | kJ/mol  | (ZPE + temperature correction)                |
| Enthalpy:               | -475.787262 | au      | (Electronic Energy + Enthalpy Correction)     |
| Entropy:                | 419.38      | J/mol·K |                                               |
| Gibbs Energy:           | -475.834886 | au      | (Enthalpy + T×Entropy)                        |
| $C_v$ :                 | 178.98      | J/mol·K |                                               |

 **$[\text{Pt}(\text{CN})(\text{CNH}_3)]^+$** 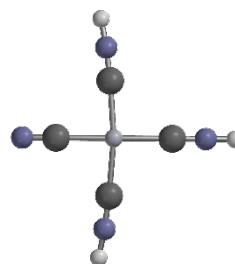**Figure S6:** Optimised structure of  $[\text{Pt}(\text{CN})(\text{CNH}_3)]^+$  in the gas phase.**Table S9:** Cartesian coordinates for  $[\text{Pt}(\text{CN})(\text{CNH}_3)]^+$ 

| Atom | X         | Y         | Z         |
|------|-----------|-----------|-----------|
| Pt   | 0.000242  | -0.000272 | -0.201959 |
| C    | 0.000212  | -0.003614 | -2.186867 |
| C    | 1.976827  | 0.000629  | -0.343418 |
| C    | -1.976379 | -0.000971 | -0.342445 |
| C    | -0.000106 | 0.002247  | 1.812653  |
| N    | 0.000399  | -0.0062   | -3.347575 |
| N    | -3.12044  | -0.000814 | -0.486984 |
| N    | 3.120919  | 0.001576  | -0.488064 |
| N    | -0.000887 | 0.003146  | 2.968504  |
| H    | -0.001194 | 0.003422  | 3.973165  |
| H    | 4.107663  | 0.002147  | -0.679306 |
| H    | -4.107256 | -0.001296 | -0.677704 |

**Table S10:** Thermodynamic properties at 298.15 °K

|                         |             |         |                                               |
|-------------------------|-------------|---------|-----------------------------------------------|
| Zero Point Energy:      | 165.82      | kJ/mol  | (ZPE)                                         |
| Temperature Correction: | 29.65       | kJ/mol  | (vibration+ gas law + rotation + translation) |
| Enthalpy Correction:    | 195.47      | kJ/mol  | (ZPE + temperature correction)                |
| Enthalpy:               | -491.889321 | au      | (Electronic Energy + Enthalpy Correction)     |
| Entropy:                | 414.89      | J/mol·K |                                               |
| Gibbs Energy:           | -491.936436 | au      | (Enthalpy + T×Entropy)                        |
| $C_v$ :                 | 170.82      | J/mol·K |                                               |

 **$[\text{Pt}(\text{CP})(\text{CNH}_3)]^+$** 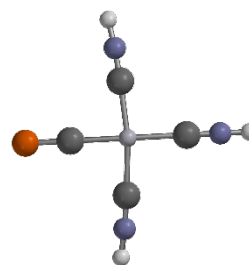**Figure S7:** Optimised structure of  $[\text{Pt}(\text{CP})(\text{CNH}_3)]^+$  in the gas phase.

**Table S11:** Cartesian coordinates for  $[\text{Pt}(\text{CP})(\text{CNH})_3]^+$ 

| Atom | X         | Y         | Z         |
|------|-----------|-----------|-----------|
| Pt   | -0.000178 | -0.007952 | -0.181017 |
| C    | -0.000528 | -0.068966 | -2.158566 |
| C    | 1.972094  | -0.013004 | -0.326619 |
| C    | -1.97233  | -0.01031  | -0.32645  |
| C    | 0.000179  | 0.057505  | 1.851981  |
| P    | -0.000675 | -0.113011 | -3.705117 |
| N    | -3.119591 | -0.010879 | -0.457005 |
| N    | 3.119331  | -0.011649 | -0.456732 |
| N    | 0.000656  | 0.09612   | 3.008929  |
| H    | -4.108269 | -0.023904 | -0.631163 |
| H    | 0.001172  | 0.130308  | 4.011918  |
| H    | 4.108139  | -0.024257 | -0.630158 |

**Table S12:** Thermodynamic properties at 298.15 °K

|                         |             |         |                                               |
|-------------------------|-------------|---------|-----------------------------------------------|
| Zero Point Energy:      | 158.62      | kJ/mol  | (ZPE)                                         |
| Temperature Correction: | 30.51       | kJ/mol  | (vibration+ gas law + rotation + translation) |
| Enthalpy Correction:    | 189.13      | kJ/mol  | (ZPE + temperature correction)                |
| Enthalpy:               | -778.458363 | au      | (Electronic Energy + Enthalpy Correction)     |
| Entropy:                | 424.36      | J/mol·K |                                               |
| Gibbs Energy:           | -778.506553 | au      | (Enthalpy + T×Entropy)                        |
| $C_v$ :                 | 174.45      | J/mol·K |                                               |

 **$[\text{Pt}(\text{CAS})(\text{CNH})_3]^+$** 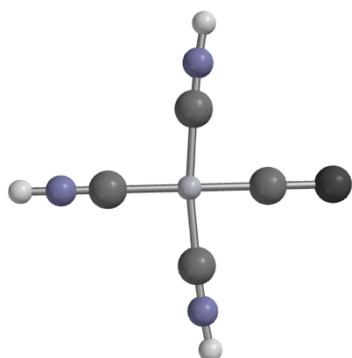**Figure S8:** Optimised structure of  $[\text{Pt}(\text{CAS})(\text{CNH})_3]^+$  in the gas phase.**Table S13:** Cartesian coordinates for  $[\text{Pt}(\text{CAS})(\text{CNH})_3]^+$ 

| Atom | x         | y         | z         |
|------|-----------|-----------|-----------|
| Pt   | 0.000118  | -0.000713 | -0.172994 |
| C    | -0.000034 | 0.000948  | -2.152080 |
| C    | -1.971879 | -0.000637 | -0.319201 |
| C    | 1.972088  | -0.000358 | -0.319056 |
| C    | 0.000126  | -0.001426 | 1.862486  |
| As   | -0.000281 | 0.003171  | -3.808170 |
| N    | 3.119753  | -0.000130 | -0.448627 |
| N    | -3.119679 | -0.000467 | -0.448106 |
| N    | 0.000141  | -0.000821 | 3.020476  |
| H    | 4.108686  | 0.000210  | -0.619496 |
| H    | -0.000387 | -0.000465 | 4.023826  |
| H    | -4.108652 | 0.000687  | -0.619060 |

**Table S14:** Thermodynamic properties at 298.15 °K

|                          |              |         |                                                |
|--------------------------|--------------|---------|------------------------------------------------|
| Zero Point Energy :      | 156.25       | kJ/mol  | (ZPE)                                          |
| Temperature Correction : | 30.93        | kJ/mol  | (vibration + gas law + rotation + translation) |
| Enthalpy Correction :    | 187.19       | kJ/mol  | (ZPE + temperature correction)                 |
| Enthalpy :               | -2672.781286 | au      | (Electronic Energy + Enthalpy Correction)      |
| Entropy :                | 433.83       | J/mol·K |                                                |
| Gibbs Energy :           | -2672.830552 | au      | (Enthalpy - T*Entropy)                         |
| $C_v$ :                  | 176.34       | J/mol·K |                                                |

 **$[\text{Pt}(\text{CSb})(\text{CNH})_3]^+$** 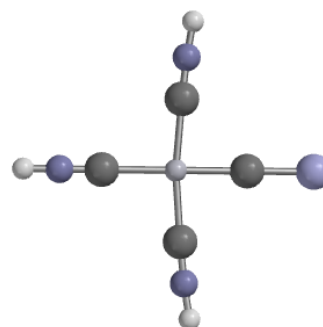**Figure S9:** Optimised structure of  $[\text{Pt}(\text{CSb})(\text{CNH})_3]^+$  in the gas phase.**Table S15:** Cartesian coordinates for  $[\text{Pt}(\text{CSb})(\text{CNH})_3]^+$ 

| Atom | x         | y         | z         |
|------|-----------|-----------|-----------|
| Pt   | 0.000454  | -0.000231 | -0.164460 |
| C    | 0.000437  | -0.001397 | -2.139274 |
| C    | 1.971832  | 0.000313  | -0.308612 |
| C    | -1.971465 | -0.001294 | -0.308401 |
| C    | 0.000468  | 0.000594  | 1.878066  |
| Sb   | 0.000795  | -0.000946 | -3.991370 |
| N    | -3.120821 | -0.001401 | -0.428578 |
| N    | 3.121072  | 0.001620  | -0.429432 |
| N    | -0.000494 | 0.001347  | 3.036701  |
| H    | -4.110024 | -0.000341 | -0.590888 |
| H    | -0.002836 | 0.000821  | 4.039104  |
| H    | 4.110580  | 0.000914  | -0.592855 |

**Table S16:** Thermodynamic properties at 298.15 °K

|                          |             |         |                                                |
|--------------------------|-------------|---------|------------------------------------------------|
| Zero Point Energy :      | 154.50      | kJ/mol  | (ZPE)                                          |
| Temperature Correction : | 31.21       | kJ/mol  | (vibration + gas law + rotation + translation) |
| Enthalpy Correction :    | 185.71      | kJ/mol  | (ZPE + temperature correction)                 |
| Enthalpy :               | -442.516120 | au      | (Electronic Energy + Enthalpy Correction)      |
| Entropy :                | 440.58      | J/mol·K |                                                |
| Gibbs Energy :           | -442.566152 | au      | (Enthalpy - T*Entropy)                         |
| $C_v$ :                  | 178.16      | J/mol·K |                                                |

 **$[\text{Pt}(\text{BNH})(\text{CNH})_3]^+$** 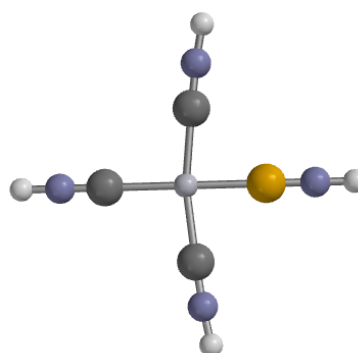**Figure S10:** Optimised structure of  $[\text{Pt}(\text{BNH})(\text{CNH})_3]^+$  in the gas phase.



**Table S17:** Cartesian coordinates for  $[\text{Pt}(\text{BNH})(\text{CNH})_3]^+$ 

| Atom | x         | y        | z         |
|------|-----------|----------|-----------|
| Pt   | 0.000000  | 0.000000 | -0.168450 |
| B    | -0.000000 | 0.000000 | 1.875373  |
| C    | -1.958615 | 0.000000 | 0.028204  |
| C    | 1.958615  | 0.000000 | 0.028204  |
| C    | 0.000000  | 0.000000 | -2.246627 |
| N    | -0.000000 | 0.000000 | 3.114923  |
| H    | 0.000000  | 0.000000 | 4.111062  |
| N    | 3.105450  | 0.000000 | 0.174908  |
| N    | -3.105450 | 0.000000 | 0.174908  |
| N    | 0.000000  | 0.000000 | -3.404431 |
| H    | -4.091452 | 0.000000 | 0.360062  |
| H    | 4.091452  | 0.000000 | 0.360062  |
| H    | 0.000000  | 0.000000 | -4.408199 |

**Table S18:** Thermodynamic properties at 298.15 °K

|                          |            |         |                                                |
|--------------------------|------------|---------|------------------------------------------------|
| Zero Point Energy :      | 189.51     | kJ/mol  | (ZPE)                                          |
| Temperature Correction : | 31.56      | kJ/mol  | (vibration + gas law + rotation + translation) |
| Enthalpy Correction :    | 221.06     | kJ/mol  | (ZPE + temperature correction)                 |
| Enthalpy :               | -          |         | (Electronic Energy + Enthalpy Correction)      |
|                          | 479.276803 | au      |                                                |
| Entropy :                | 419.50     | J/mol•K |                                                |
| Gibbs Energy :           | -          |         | (Enthalpy - T*Entropy)                         |
|                          | 479.324441 | au      |                                                |
| $C_v$ :                  | 184.34     | J/mol•K |                                                |

 **$[\text{Pt}(\text{BO})(\text{CNH})_3]^+$** 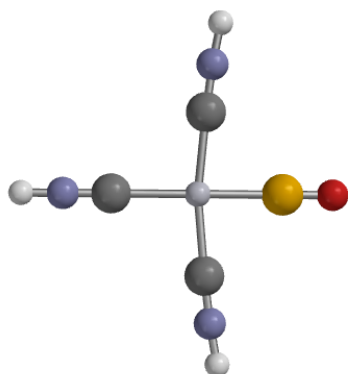**Figure S11:** Optimised structure of  $[\text{Pt}(\text{BO})(\text{CNH})_3]^+$  in the gas phase.**Table S19:** Cartesian coordinates for  $[\text{Pt}(\text{BO})(\text{CNH})_3]^+$ 

| Atom | x         | y        | z         |
|------|-----------|----------|-----------|
| Pt   | 0.000000  | 0.000000 | 0.189257  |
| B    | 0.000000  | 0.000000 | 2.224405  |
| C    | -1.964965 | 0.000000 | 0.366535  |
| C    | 1.964965  | 0.000000 | 0.366535  |
| C    | 0.000000  | 0.000000 | -1.889448 |
| O    | 0.000000  | 0.000000 | 3.429639  |
| N    | 3.110949  | 0.000000 | 0.510290  |
| N    | -3.110949 | 0.000000 | 0.510290  |
| N    | 0.000000  | 0.000000 | -3.046054 |
| H    | -4.098497 | 0.000000 | 0.694609  |
| H    | 4.098497  | 0.000000 | 0.694609  |
| H    | 0.000000  | 0.000000 | -4.050668 |

**Table S20:** Thermodynamic properties at 298.15 °K

|                          |             |         |                                                |
|--------------------------|-------------|---------|------------------------------------------------|
| Zero Point Energy :      | 162.72      | kJ/mol  | (ZPE)                                          |
| Temperature Correction : | 30.01       | kJ/mol  | (vibration + gas law + rotation + translation) |
| Enthalpy Correction :    | 192.72      | kJ/mol  | (ZPE + temperature correction)                 |
| Enthalpy :               | -499.188737 | au      | (Electronic Energy + Enthalpy Correction)      |
| Entropy :                | 411.84      | J/mol•K |                                                |
| Gibbs Energy :           | -499.235505 | au      | (Enthalpy - T*Entropy)                         |
| $C_v$ :                  | 172.34      | J/mol•K |                                                |

 **$[\text{Pt}(\text{B}=\text{CH}_2)(\text{CNH})_3]^+$** 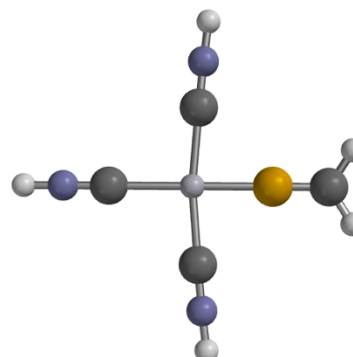**Figure S12:** Optimised structure of  $[\text{Pt}(\text{B}=\text{CH}_2)(\text{CNH})_3]^+$  in the gas phase.

**Table S21:** Cartesian coordinates for  $[\text{Pt}(\text{B}=\text{CH}_2)(\text{CNH})_3]^+$ 

| Atom | x         | y        | z         |
|------|-----------|----------|-----------|
| Pt   | 0.000000  | 0.000000 | -0.383283 |
| B    | -0.000000 | 0.000000 | 1.625707  |
| C    | -1.963519 | 0.000000 | -0.229572 |
| C    | 1.963519  | 0.000000 | -0.229572 |
| C    | 0.000000  | 0.000000 | -2.478135 |
| N    | 3.115214  | 0.000000 | -0.122734 |
| N    | -3.115214 | 0.000000 | -0.122734 |
| N    | 0.000000  | 0.000000 | -3.636384 |
| H    | -4.111223 | 0.000000 | -0.001177 |
| H    | 4.111223  | 0.000000 | -0.001177 |
| H    | 0.000000  | 0.000000 | -4.640050 |
| C    | -0.000000 | 0.000000 | 3.015217  |
| H    | 0.916606  | 0.000000 | 3.601947  |
| H    | -0.916606 | 0.000000 | 3.601947  |

**Table S22:** Thermodynamic properties at 298.15 °K

|                                 |             |         |                                                |
|---------------------------------|-------------|---------|------------------------------------------------|
| <b>Zero Point Energy :</b>      | 211.62      | kJ/mol  | (ZPE)                                          |
| <b>Temperature Correction :</b> | 32.63       | kJ/mol  | (vibration + gas law + rotation + translation) |
| <b>Enthalpy Correction :</b>    | 244.25      | kJ/mol  | (ZPE + temperature correction)                 |
| <b>Enthalpy :</b>               | -463.158582 | au      | (Electronic Energy + Enthalpy Correction)      |
| <b>Entropy :</b>                | 427.82      | J/mol•K |                                                |
| <b>Gibbs Energy :</b>           | -463.207165 | au      | (Enthalpy - T*Entropy)                         |
| <b>C<sub>v</sub> :</b>          | 190.76      | J/mol•K |                                                |

 **$[\text{Pt}(\text{CNO})(\text{CNH})_3]^+$** 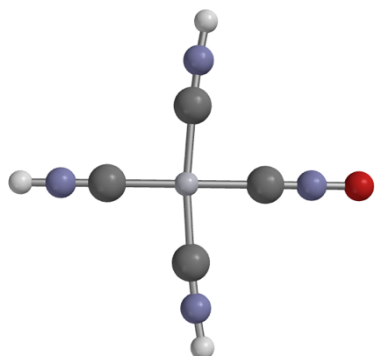**Figure S13:** Optimised structure of  $[\text{Pt}(\text{CNO})(\text{CNH})_3]^+$  in the gas phase.**Table S23:** Cartesian coordinates for  $[\text{Pt}(\text{CNO})(\text{CNH})_3]^+$ 

| Atom | x         | y         | z         |
|------|-----------|-----------|-----------|
| Pt   | -0.001379 | -0.002558 | 0.147065  |
| C    | -0.001171 | 0.019105  | -1.839148 |
| C    | -1.976976 | 0.000532  | 0.015093  |
| C    | 1.974076  | -0.002117 | 0.013632  |
| C    | -0.000594 | -0.023517 | 2.135517  |
| N    | 3.119488  | 0.000194  | -0.123280 |
| N    | -3.122430 | 0.003467  | -0.121187 |
| N    | 0.000303  | -0.035491 | 3.292184  |
| H    | 4.108341  | 0.000081  | -0.300960 |
| H    | 0.001626  | -0.045351 | 4.296522  |
| H    | -4.111424 | 0.004335  | -0.297534 |
| N    | 0.003213  | 0.033400  | -3.008409 |
| O    | 0.006927  | 0.047920  | -4.209494 |

**Table S24:** Thermodynamic properties at 298.15 °K

|                                 |             |         |                                                |
|---------------------------------|-------------|---------|------------------------------------------------|
| <b>Zero Point Energy :</b>      | 177.42      | kJ/mol  | (ZPE)                                          |
| <b>Temperature Correction :</b> | 31.52       | kJ/mol  | (vibration + gas law + rotation + translation) |
| <b>Enthalpy Correction :</b>    | 208.94      | kJ/mol  | (ZPE + temperature correction)                 |
| <b>Enthalpy :</b>               | -567.009149 | au      | (Electronic Energy + Enthalpy Correction)      |
| <b>Entropy :</b>                | 431.73      | J/mol•K |                                                |
| <b>Gibbs Energy :</b>           | -567.058176 | au      | (Enthalpy - T*Entropy)                         |
| <b>C<sub>v</sub> :</b>          | 185.03      | J/mol•K |                                                |

 **$[\text{Pt}\{\text{C}\equiv\text{W}(\text{CO})_2\text{Tp}\}\{\text{CNH}\}_3]^+$** 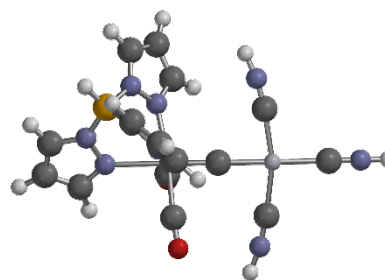**Figure S14:** Optimised structure of  $[\text{Pt}\{\text{C}\equiv\text{W}(\text{CO})_2\text{Tp}\}\{\text{CNH}\}_3]^+$  in the gas phase.

**Table S25:** Cartesian coordinates for  $[\text{Pt}(\text{C}\equiv\text{W}(\text{CO})_2\text{Tp})(\text{CNH})_3]^+$ 

| Atom | X         | Y         | Z         |
|------|-----------|-----------|-----------|
| Pt   | -1.23012  | -3.581932 | 0.936207  |
| W    | 0.433257  | -0.571841 | -0.65766  |
| O    | 3.150254  | -2.207177 | -0.635296 |
| O    | -0.311631 | -1.963001 | -3.390791 |
| N    | 1.518678  | 1.23356   | -1.620503 |
| N    | 1.320797  | 2.483568  | -1.140291 |
| N    | 0.972236  | 0.590791  | 1.172166  |
| N    | 0.819784  | 1.928927  | 1.25092   |
| N    | -1.223194 | 0.902969  | -0.704895 |
| N    | -1.047431 | 2.203418  | -2.380878 |
| C    | -0.365774 | -2.000404 | 0.107355  |
| C    | 2.1712    | -1.601764 | -0.652515 |
| C    | -0.027523 | -1.404639 | -2.416678 |
| C    | 2.4042    | 1.335376  | -2.615166 |
| C    | 2.788606  | 2.665431  | -2.790204 |
| H    | 3.483583  | 3.06579   | -3.511471 |
| C    | 2.073219  | 3.358192  | -1.828873 |
| C    | 1.441221  | 0.179804  | 2.353907  |
| C    | 1.58096   | 1.264889  | 3.222135  |
| H    | 1.957754  | 1.26499   | 4.233539  |
| C    | 1.179011  | 2.358641  | 2.470667  |
| C    | -2.510343 | 0.752804  | -1.030814 |
| C    | -3.184824 | 1.968543  | -0.914955 |
| H    | -4.226514 | 2.171007  | -1.108668 |
| C    | -2.211489 | 2.862381  | -0.502136 |
| B    | 0.34113   | 2.736482  | 0.020488  |
| H    | 0.28583   | 3.906321  | 0.285894  |
| H    | 1.133906  | 3.409715  | 2.714522  |
| H    | 1.670894  | -0.866026 | 2.501971  |
| H    | 2.044054  | 4.410846  | -1.588731 |
| H    | 2.715776  | 0.405646  | -3.152727 |
| H    | -2.262831 | 3.920196  | -0.290796 |
| H    | -2.875503 | -0.219073 | -1.329065 |
| C    | -1.007176 | -4.366275 | -0.860503 |
| C    | -2.14959  | -5.200365 | 1.812465  |
| C    | -1.251685 | -2.396357 | 2.515527  |
| N    | -1.205059 | -1.613933 | 3.366737  |
| N    | -2.672316 | -6.108824 | 2.308864  |
| N    | -0.847652 | -4.716081 | -1.951103 |
| H    | -0.669494 | -4.875082 | -2.925864 |
| H    | -3.122507 | -6.895305 | 2.737316  |
| H    | -1.083695 | -0.837208 | 3.990128  |

**Table S26:** Thermodynamic properties at 298.15 °K

|                         |              |         |                                               |
|-------------------------|--------------|---------|-----------------------------------------------|
| Zero Point Energy:      | 706.01       | kJ/mol  | (ZPE)                                         |
| Temperature Correction: | 67.77        | kJ/mol  | (vibration+ gas law + rotation + translation) |
| Enthalpy Correction:    | 773.78       | kJ/mol  | (ZPE + temperature correction)                |
| Enthalpy:               | -1433.621619 | au      | (Electronic Energy + Enthalpy Correction)     |
| Entropy:                | 677.90       | J/mol-K |                                               |
| Gibbs Energy:           | -1433.698601 | au      | (Enthalpy + TxEntropy)                        |
| C <sub>v</sub> :        | 471.99       | J/mol-K |                                               |

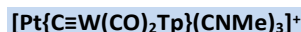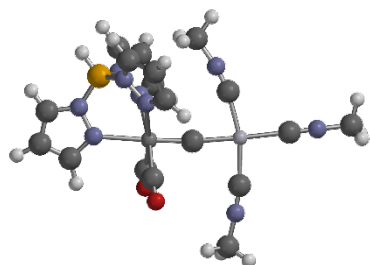**Figure S15:** Optimised structure of  $[\text{Pt}(\text{C}\equiv\text{W}(\text{CO})_2\text{Tp})(\text{CNMe})_3]^+$  in the gas phase.**Table S27:** Cartesian coordinates for  $[\text{Pt}(\text{C}\equiv\text{W}(\text{CO})_2\text{Tp})(\text{CNMe})_3]^+$ 

| Atom | X         | Y         | Z         |
|------|-----------|-----------|-----------|
| Pt   | -0.987968 | -2.762342 | 0.632401  |
| W    | 0.859177  | 0.107293  | -0.979122 |
| O    | 3.509773  | -1.607805 | -1.17095  |
| O    | 0.010813  | -1.077232 | -3.782594 |
| N    | 1.822268  | 2.023144  | -1.871557 |
| N    | 1.615912  | 3.234342  | -1.305309 |
| N    | 1.445066  | 1.164067  | 0.911295  |
| N    | 1.305695  | 2.497256  | 1.073551  |
| N    | -0.850397 | 1.546638  | -0.776899 |
| N    | -0.681051 | 2.827721  | -0.384446 |
| C    | 0.045741  | -1.329648 | -0.254686 |
| C    | 2.557349  | -0.958762 | -1.110756 |
| C    | 0.327383  | -0.605995 | -2.775513 |
| C    | 2.621866  | 2.218576  | -2.922505 |
| C    | 2.942683  | 3.571764  | -3.046356 |
| H    | 3.56488   | 4.040976  | -3.792249 |
| C    | 2.278976  | 4.178685  | -1.994866 |
| C    | 1.924326  | 0.677909  | 2.058876  |
| C    | 2.093355  | 1.708143  | 2.988382  |
| H    | 2.478035  | 1.638634  | 3.994133  |
| C    | 1.691783  | 2.849282  | 2.311592  |
| C    | -2.161531 | 1.359732  | -0.946602 |
| C    | -2.860551 | 2.533878  | -0.652278 |
| H    | -3.924271 | 2.705527  | -0.709745 |
| C    | -1.873463 | 3.424274  | -0.30464  |
| B    | 0.728141  | 3.374637  | -0.061003 |
| H    | 0.660318  | 4.521334  | 0.292002  |
| H    | 1.663037  | 3.88455   | 2.618279  |
| H    | 2.123601  | -0.380252 | 2.147645  |
| H    | 2.23105   | 5.213551  | -1.689365 |
| H    | 2.924425  | 1.379013  | -3.532755 |
| H    | -1.93311  | 4.481288  | -0.015018 |
| H    | -2.524298 | 0.39603   | -1.273716 |
| C    | -0.268991 | -3.934819 | -0.784375 |
| C    | -2.100862 | -4.198936 | 1.601786  |
| C    | -1.4692   | -1.216888 | 1.781577  |
| N    | -1.627957 | -0.193236 | 2.295077  |
| N    | -2.730245 | -5.005009 | 2.148122  |
| N    | 0.202865  | -4.494604 | -1.679402 |
| C    | -1.693662 | 1.152823  | 2.750826  |
| H    | -2.330565 | 1.207682  | 3.63473   |
| H    | -2.107131 | 1.765085  | 1.944601  |
| H    | -0.679226 | 1.4821    | 2.991668  |
| C    | -3.501647 | -5.994417 | 2.819698  |
| H    | -2.833111 | -6.766993 | 3.203705  |
| H    | -4.210419 | -6.432649 | 2.114678  |
| H    | -4.040744 | -5.524646 | 3.645088  |
| C    | 0.823748  | -5.070388 | -2.823228 |
| H    | 1.860498  | -5.307677 | -2.578006 |
| H    | 0.789545  | -4.342293 | -3.635922 |
| H    | 0.288092  | -5.977742 | -3.105847 |

**Table S28:** Thermodynamic properties at 298.15 °K

|                         |              |         |                                               |
|-------------------------|--------------|---------|-----------------------------------------------|
| Zero Point Energy:      | 927.85       | kJ/mol  | (ZPE)                                         |
| Temperature Correction: | 75.91        | kJ/mol  | (vibration+ gas law + rotation + translation) |
| Enthalpy Correction:    | 1003.77      | kJ/mol  | (ZPE + temperature correction)                |
| Enthalpy:               | -1551.482936 | au      | (Electronic Energy + Enthalpy Correction)     |
| Entropy:                | 740.57       | J/mol-K |                                               |
| Gibbs Energy:           | -1551.567034 | au      | (Enthalpy + TxEntropy)                        |
| C <sub>v</sub> :        | 526.31       | J/mol-K |                                               |

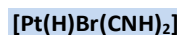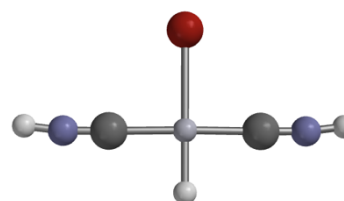**Figure S16:** Optimised structure of  $[\text{Pt}(\text{H})\text{Br}(\text{CNH})_2]$  in the gas phase.

**Table S29:** Cartesian coordinates for [Pt(H)Br(CNH)<sub>2</sub>]

| Atom | x         | y        | z         |
|------|-----------|----------|-----------|
| Pt   | -0.000182 | 0.000000 | 0.121901  |
| H    | -0.000886 | 0.000000 | 1.712199  |
| C    | -1.943795 | 0.000000 | 0.144204  |
| C    | 1.943579  | 0.000000 | 0.145815  |
| N    | 3.105965  | 0.000000 | 0.141705  |
| N    | -3.106246 | 0.000000 | 0.139905  |
| H    | -4.096386 | 0.000000 | 0.018107  |
| H    | 4.096554  | 0.000000 | 0.023755  |
| Br   | 0.001398  | 0.000000 | -2.447591 |

**Table S30:** Thermodynamic properties at 298.15 °K

|                                 |              |         |                                                |
|---------------------------------|--------------|---------|------------------------------------------------|
| <b>Zero Point Energy :</b>      | 114.55       | kJ/mol  | (ZPE)                                          |
| <b>Temperature Correction :</b> | 24.19        | kJ/mol  | (vibration + gas law + rotation + translation) |
| <b>Enthalpy Correction :</b>    | 138.74       | kJ/mol  | (ZPE + temperature correction)                 |
| <b>Enthalpy :</b>               | -2880.477679 | au      | (Electronic Energy + Enthalpy Correction)      |
| <b>Entropy :</b>                | 387.16       | J/mol•K |                                                |
| <b>Gibbs Energy :</b>           | -2880.521645 | au      | (Enthalpy - T*Entropy)                         |
| <b>C<sub>v</sub> :</b>          | 127.67       | J/mol•K |                                                |

**[Pt(CH<sub>2</sub>CH<sub>3</sub>)Br(CNH)<sub>2</sub>]**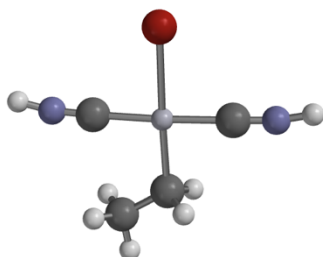**Figure S17:** Optimised structure of [Pt(CH<sub>2</sub>CH<sub>3</sub>)Br(CNH)<sub>2</sub>] in the gas phase.**Table S31:** Cartesian coordinates for [Pt(CH<sub>2</sub>CH<sub>3</sub>)Br(CNH)<sub>2</sub>]

| Atom | x         | y         | z         |
|------|-----------|-----------|-----------|
| Pt   | -0.336800 | 0.000000  | -1.013234 |
| C    | -2.280831 | 0.000000  | -0.975777 |
| C    | 1.601319  | 0.000000  | -1.151451 |
| N    | 2.758262  | -0.000000 | -1.275831 |
| N    | -3.444223 | -0.000000 | -0.970359 |
| H    | -4.429461 | -0.000000 | -1.128195 |
| H    | 3.719427  | -0.000000 | -1.543061 |
| C    | -0.348428 | 0.000000  | 1.081332  |
| H    | -0.925008 | -0.881192 | 1.390373  |
| H    | -0.925007 | 0.881192  | 1.390373  |
| C    | 0.997382  | -0.000000 | 1.801485  |
| H    | 1.591896  | -0.885787 | 1.552192  |
| H    | 0.850012  | -0.000000 | 2.889474  |
| H    | 1.591896  | 0.885786  | 1.552192  |
| Br   | -0.420434 | 0.000000  | -3.599513 |

**Table S32:** Thermodynamic properties at 298.15 °K

|                                 |              |         |                                                |
|---------------------------------|--------------|---------|------------------------------------------------|
| <b>Zero Point Energy :</b>      | 259.89       | kJ/mol  | (ZPE)                                          |
| <b>Temperature Correction :</b> | 30.78        | kJ/mol  | (vibration + gas law + rotation + translation) |
| <b>Enthalpy Correction :</b>    | 290.67       | kJ/mol  | (ZPE + temperature correction)                 |
| <b>Enthalpy :</b>               | -2959.017210 | au      | (Electronic Energy + Enthalpy Correction)      |
| <b>Entropy :</b>                | 431.67       | J/mol•K |                                                |
| <b>Gibbs Energy :</b>           | -2959.066230 | au      | (Enthalpy - T*Entropy)                         |
| <b>C<sub>v</sub> :</b>          | 175.80       | J/mol•K |                                                |

**[Pt(CH=CH<sub>2</sub>)Br(CNH)<sub>2</sub>]**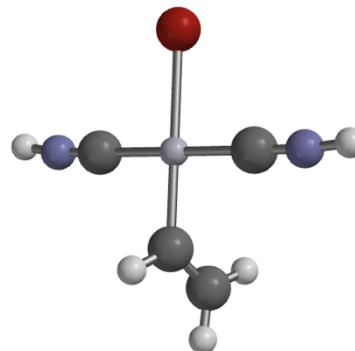**Figure S18:** Optimised structure of [Pt(CH=CH<sub>2</sub>)Br(CNH)<sub>2</sub>] in the gas phase.**Table S33:** Cartesian coordinates for [Pt(CH=CH<sub>2</sub>)Br(CNH)<sub>2</sub>]

| Atom | x         | y         | z         |
|------|-----------|-----------|-----------|
| Pt   | 0.105831  | -0.140037 | -0.849626 |
| C    | -1.833237 | -0.303426 | -0.897404 |
| C    | 2.045505  | 0.053732  | -0.806884 |
| N    | 3.200929  | 0.180225  | -0.799021 |
| N    | -2.990486 | -0.398562 | -0.936497 |
| H    | -3.977994 | -0.467064 | -1.060970 |
| H    | 4.184701  | 0.307417  | -0.906420 |
| C    | 0.069164  | -0.374840 | 1.170209  |
| H    | 0.434065  | -1.337120 | 1.537425  |
| C    | -0.344230 | 0.526270  | 2.059228  |
| H    | -0.719257 | 1.505173  | 1.768626  |
| H    | -0.320846 | 0.315450  | 3.127722  |
| Br   | 0.145855  | 0.132781  | -3.406387 |

**Table S34:** Thermodynamic properties at 298.15 °K

|                                 |              |         |                                                |
|---------------------------------|--------------|---------|------------------------------------------------|
| <b>Zero Point Energy :</b>      | 200.83       | kJ/mol  | (ZPE)                                          |
| <b>Temperature Correction :</b> | 29.54        | kJ/mol  | (vibration + gas law + rotation + translation) |
| <b>Enthalpy Correction :</b>    | 230.37       | kJ/mol  | (ZPE + temperature correction)                 |
| <b>Enthalpy :</b>               | -2957.802777 | au      | (Electronic Energy + Enthalpy Correction)      |
| <b>Entropy :</b>                | 424.17       | J/mol•K |                                                |
| <b>Gibbs Energy :</b>           | -2957.850945 | au      | (Enthalpy - T*Entropy)                         |
| <b>C<sub>v</sub> :</b>          | 167.67       | J/mol•K |                                                |

**[PtBr(CCH)(CNH)<sub>2</sub>]**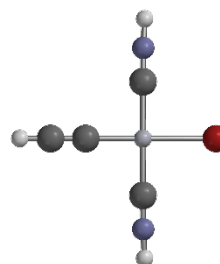**Figure S19:** Optimised structure of [PtBr(CCH)(CNH)<sub>2</sub>] in the gas phase.

**Table S35:** Cartesian coordinates for [PtBr(CCH)(CNH)<sub>2</sub>]

| Atom | X         | Y   | Z         |
|------|-----------|-----|-----------|
| Pt   | -0.00052  | 0.0 | 0.611934  |
| C    | -0.000777 | 0.0 | -1.364526 |
| C    | -1.951059 | 0.0 | 0.617911  |
| C    | 1.950617  | 0.0 | 0.61747   |
| Br   | -0.000766 | 0.0 | 3.143306  |
| C    | 0.000628  | 0.0 | -2.577444 |
| H    | 0.002322  | 0.0 | -3.644086 |
| N    | 3.110523  | 0.0 | 0.624987  |
| N    | -3.110917 | 0.0 | 0.626706  |
| H    | -4.107799 | 0.0 | 0.67318   |
| H    | 4.107747  | 0.0 | 0.670562  |

**Table S36:** Thermodynamic properties at 298.15 °K

|                         |              |         |                                                        |
|-------------------------|--------------|---------|--------------------------------------------------------|
| Zero Point Energy:      | 144.11       | kJ/mol  | (ZPE)<br>(vibration+ gas law + rotation + translation) |
| Temperature Correction: | 28.67        | kJ/mol  | (ZPE + temperature correction)                         |
| Enthalpy Correction:    | 172.78       | kJ/mol  | (Electronic Energy + Enthalpy Correction)              |
| Enthalpy:               | -2956.579354 | au      | (Enthalpy + TxEntropy)                                 |
| Entropy:                | 417.23       | J/mol-K |                                                        |
| Gibbs Energy:           | -2956.626734 | au      |                                                        |
| C <sub>v</sub> :        | 160.90       | J/mol-K |                                                        |

**[PtBr(CN)(CNH)<sub>2</sub>]**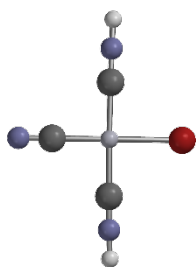**Figure S20:** Optimised structure of [PtBr(CN)(CNH)<sub>2</sub>] in the gas phase.**Table S37:** Cartesian coordinates for [PtBr(CN)(CNH)<sub>2</sub>]

| Atom | X         | Y         | Z         |
|------|-----------|-----------|-----------|
| Pt   | 3.1e-05   | 0.00034   | -0.231274 |
| C    | -0.00188  | -0.000789 | 1.741521  |
| C    | 1.956376  | 7.5e-05   | -0.250594 |
| C    | -1.95591  | 0.000598  | -0.2545   |
| Br   | 0.003634  | 0.001635  | -2.749154 |
| N    | -0.003097 | -0.000948 | 2.904516  |
| N    | -3.114303 | -0.000146 | -0.273768 |
| N    | 3.11475   | -0.000609 | -0.266668 |
| H    | 4.112851  | -0.000159 | -0.307257 |
| H    | -4.112451 | 1e-06     | -0.312821 |

**Table S38:** Thermodynamic properties at 298.15 °K

|                         |              |         |                                                        |
|-------------------------|--------------|---------|--------------------------------------------------------|
| Zero Point Energy:      | 118.06       | kJ/mol  | (ZPE)<br>(vibration+ gas law + rotation + translation) |
| Temperature Correction: | 27.68        | kJ/mol  | (ZPE + temperature correction)                         |
| Enthalpy Correction:    | 145.74       | kJ/mol  | (Electronic Energy + Enthalpy Correction)              |
| Enthalpy:               | -2972.694972 | au      | (Enthalpy + TxEntropy)                                 |
| Entropy:                | 412.27       | J/mol-K |                                                        |
| Gibbs Energy:           | -2972.741788 | au      |                                                        |
| C <sub>v</sub> :        | 152.30       | J/mol-K |                                                        |

**[PtBr(CP)(CNH)<sub>2</sub>]**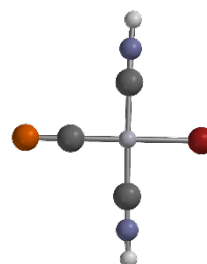**Figure S21:** Optimised structure of [PtBr(CP)(CNH)<sub>2</sub>] in the gas phase.**Table S39:** Cartesian coordinates for [PtBr(CP)(CNH)<sub>2</sub>]

| Atom | X         | Y         | Z         |
|------|-----------|-----------|-----------|
| Pt   | 0.000203  | -0.042057 | -0.253262 |
| C    | -0.001152 | 0.282189  | 1.676799  |
| C    | -1.955786 | -0.048547 | -0.275843 |
| C    | 1.956337  | -0.042713 | -0.275218 |
| Br   | 0.00186   | -0.461932 | -2.757655 |
| P    | -0.002742 | 0.536102  | 3.210369  |
| N    | 3.115363  | -0.044577 | -0.299422 |
| N    | -3.114815 | -0.053769 | -0.299619 |
| H    | 4.111539  | -0.056817 | -0.364167 |
| H    | -4.110806 | -0.067877 | -0.361982 |

**Table S40:** Thermodynamic properties at 298.15 °K

|                         |              |         |                                                        |
|-------------------------|--------------|---------|--------------------------------------------------------|
| Zero Point Energy:      | 111.29       | kJ/mol  | (ZPE)<br>(vibration+ gas law + rotation + translation) |
| Temperature Correction: | 28.44        | kJ/mol  | (ZPE + temperature correction)                         |
| Enthalpy Correction:    | 139.73       | kJ/mol  | (Electronic Energy + Enthalpy Correction)              |
| Enthalpy:               | -3259.255337 | au      | (Enthalpy + TxEntropy)                                 |
| Entropy:                | 420.11       | J/mol-K |                                                        |
| Gibbs Energy:           | -3259.303405 | au      |                                                        |
| C <sub>v</sub> :        | 155.36       | J/mol-K |                                                        |

**[Pt(CAs)Br(CNH)<sub>2</sub>]**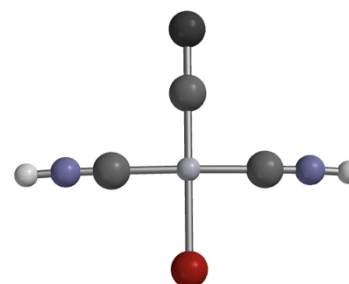**Figure S22:** Optimised structure of [Pt(CAs)Br(CNH)<sub>2</sub>] in the gas phase.

**Table S41:** Cartesian coordinates for [Pt(CAs)Br(CNH)<sub>2</sub>]

| Atom | x         | y        | z         |
|------|-----------|----------|-----------|
| Pt   | -0.000127 | 0.000000 | 0.265976  |
| C    | 0.000920  | 0.000000 | -1.691627 |
| C    | 1.955847  | 0.000000 | 0.288890  |
| C    | -1.956344 | 0.000000 | 0.288916  |
| As   | 0.002280  | 0.000000 | -3.353889 |
| N    | -3.115267 | 0.000000 | 0.315550  |
| N    | 3.114852  | 0.000000 | 0.314242  |
| H    | -4.111361 | 0.000000 | 0.382977  |
| H    | 4.111093  | 0.000000 | 0.380143  |
| Br   | -0.001893 | 0.000000 | 2.807717  |

**Table S42:** Thermodynamic properties at 298.15 °K

|                                 |              |         |                                                |
|---------------------------------|--------------|---------|------------------------------------------------|
| <b>Zero Point Energy :</b>      | 109.17       | kJ/mol  | (ZPE)                                          |
| <b>Temperature Correction :</b> | 28.85        | kJ/mol  | (vibration + gas law + rotation + translation) |
| <b>Enthalpy Correction :</b>    | 138.02       | kJ/mol  | (ZPE + temperature correction)                 |
| <b>Enthalpy :</b>               | -5153.576483 | au      | (Electronic Energy + Enthalpy Correction)      |
| <b>Entropy :</b>                | 428.10       | J/mol•K |                                                |
| <b>Gibbs Energy :</b>           | -5153.625098 | au      | (Enthalpy - T*Entropy)                         |
| <b>C<sub>v</sub> :</b>          | 156.83       | J/mol•K |                                                |

**[Pt(CSb)Br(CNH)<sub>2</sub>]**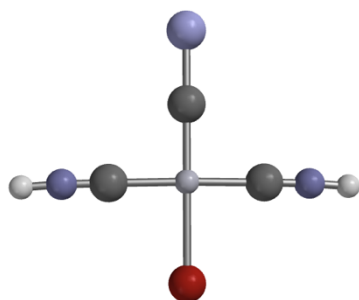**Figure S23:** Optimised structure of [Pt(CSb)Br(CNH)<sub>2</sub>] in the gas phase.**Table S43:** Cartesian coordinates for [Pt(CSb)Br(CNH)<sub>2</sub>]

| Atom | x         | y        | z         |
|------|-----------|----------|-----------|
| Pt   | 0.000225  | 0.000000 | 0.280468  |
| C    | -0.000536 | 0.000000 | -1.669807 |
| C    | 1.957010  | 0.000000 | 0.305012  |
| C    | -1.956543 | 0.000000 | 0.304973  |
| Sb   | -0.001769 | 0.000000 | -3.531158 |
| N    | -3.115717 | 0.000000 | 0.332949  |
| N    | 3.116167  | 0.000000 | 0.334470  |
| H    | -4.111495 | 0.000000 | 0.404459  |
| H    | 4.111663  | 0.000000 | 0.408009  |
| Br   | 0.000996  | 0.000000 | 2.830623  |

**Table S44:** Thermodynamic properties at 298.15 °K

|                                 |              |         |                                                |
|---------------------------------|--------------|---------|------------------------------------------------|
| <b>Zero Point Energy :</b>      | 107.84       | kJ/mol  | (ZPE)                                          |
| <b>Temperature Correction :</b> | 28.97        | kJ/mol  | (vibration + gas law + rotation + translation) |
| <b>Enthalpy Correction :</b>    | 136.81       | kJ/mol  | (ZPE + temperature correction)                 |
| <b>Enthalpy :</b>               | -2923.307738 | au      | (Electronic Energy + Enthalpy Correction)      |
| <b>Entropy :</b>                | 433.70       | J/mol•K |                                                |
| <b>Gibbs Energy :</b>           | -2923.356989 | au      | (Enthalpy - T*Entropy)                         |
| <b>C<sub>v</sub> :</b>          | 157.89       | J/mol•K |                                                |

**[Pt(BNH)Br(CNH)<sub>2</sub>]**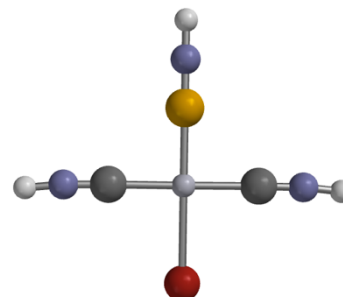**Figure S24:** Optimised structure of [Pt(BNH)Br(CNH)<sub>2</sub>] in the gas phase.**Table S45:** Cartesian coordinates for [Pt(BNH)Br(CNH)<sub>2</sub>]

| Atom | x         | y        | z         |
|------|-----------|----------|-----------|
| Pt   | -0.000248 | 0.000000 | -0.612771 |
| B    | 0.000609  | 0.000000 | 1.396200  |
| C    | -1.947591 | 0.000000 | -0.604395 |
| C    | 1.947129  | 0.000000 | -0.603833 |
| N    | 0.001069  | 0.000000 | 2.644303  |
| H    | 0.001472  | 0.000000 | 3.637511  |
| N    | 3.107900  | 0.000000 | -0.620106 |
| N    | -3.108339 | 0.000000 | -0.621761 |
| H    | -4.101914 | 0.000000 | -0.716474 |
| H    | 4.101337  | 0.000000 | -0.713035 |
| Br   | -0.001425 | 0.000000 | -3.185639 |

**Table S46:** Thermodynamic properties at 298.15 °K

|                                 |              |         |                                                |
|---------------------------------|--------------|---------|------------------------------------------------|
| <b>Zero Point Energy :</b>      | 140.78       | kJ/mol  | (ZPE)                                          |
| <b>Temperature Correction :</b> | 29.95        | kJ/mol  | (vibration + gas law + rotation + translation) |
| <b>Enthalpy Correction :</b>    | 170.73       | kJ/mol  | (ZPE + temperature correction)                 |
| <b>Enthalpy :</b>               | -2960.071659 | au      | (Electronic Energy + Enthalpy Correction)      |
| <b>Entropy :</b>                | 424.69       | J/mol•K |                                                |
| <b>Gibbs Energy :</b>           | -2960.119886 | au      | (Enthalpy - T*Entropy)                         |
| <b>C<sub>v</sub> :</b>          | 167.16       | J/mol•K |                                                |

**[Pt(BO)Br(CNH)<sub>2</sub>]**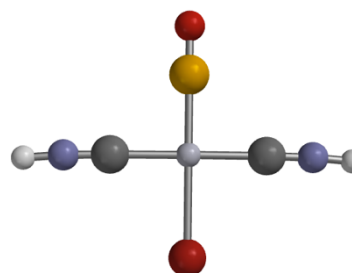**Figure S25:** Optimised structure of [Pt(BO)Br(CNH)<sub>2</sub>] in the gas phase.

**Table S47:** Cartesian coordinates for [Pt(BO)Br(CNH)<sub>2</sub>]

| Atom | x         | y        | z         |
|------|-----------|----------|-----------|
| Pt   | -0.000279 | 0.000000 | -0.234824 |
| B    | 0.000187  | 0.000000 | 1.762846  |
| C    | -1.951951 | 0.000000 | -0.240622 |
| C    | 1.951608  | 0.000000 | -0.241281 |
| O    | 0.001145  | 0.000000 | 2.975965  |
| N    | 3.110909  | 0.000000 | -0.266806 |
| N    | -3.111331 | 0.000000 | -0.265380 |
| H    | -4.106561 | 0.000000 | -0.348703 |
| H    | 4.106500  | 0.000000 | -0.346407 |
| Br   | -0.000228 | 0.000000 | -2.794789 |

**Table S48:** Thermodynamic properties at 298.15 °K

|                                 |              |         |                                                |
|---------------------------------|--------------|---------|------------------------------------------------|
| <b>Zero Point Energy :</b>      | 115.26       | kJ/mol  | (ZPE)                                          |
| <b>Temperature Correction :</b> | 27.83        | kJ/mol  | (vibration + gas law + rotation + translation) |
| <b>Enthalpy Correction :</b>    | 143.10       | kJ/mol  | (ZPE + temperature correction)                 |
| <b>Enthalpy :</b>               | -2979.994922 | au      | (Electronic Energy + Enthalpy Correction)      |
| <b>Entropy :</b>                | 413.59       | J/mol•K |                                                |
| <b>Gibbs Energy :</b>           | -2980.041889 | au      | (Enthalpy - T*Entropy)                         |
| <b>C<sub>v</sub> :</b>          | 153.17       | J/mol•K |                                                |

**[Pt(B=CH<sub>2</sub>)Br(CNH)<sub>2</sub>]**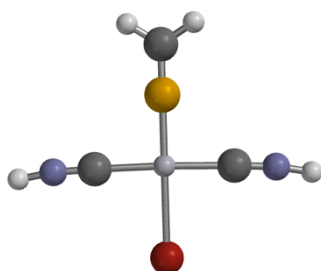**Figure S26:** Optimised structure of [Pt(B=CH<sub>2</sub>)Br(CNH)<sub>2</sub>] in the gas phase.**Table S49:** Cartesian coordinates for [Pt(B=CH<sub>2</sub>)Br(CNH)<sub>2</sub>]

| Atom | x         | y        | z         |
|------|-----------|----------|-----------|
| Pt   | 0.000000  | 0.000000 | -0.822574 |
| B    | 0.000000  | 0.000000 | 1.158289  |
| C    | -1.948014 | 0.000000 | -0.861824 |
| C    | 1.948014  | 0.000000 | -0.861824 |
| N    | 3.107794  | 0.000000 | -0.920790 |
| N    | -3.107794 | 0.000000 | -0.920790 |
| H    | -4.090877 | 0.000000 | -1.094797 |
| H    | 4.090877  | 0.000000 | -1.094797 |
| Br   | 0.000000  | 0.000000 | -3.411610 |
| C    | 0.000000  | 0.000000 | 2.554715  |
| H    | 0.918371  | 0.000000 | 3.138000  |
| H    | -0.918371 | 0.000000 | 3.138000  |

**Table S50:** Thermodynamic properties at 298.15 °K

|                                 |              |         |                                                |
|---------------------------------|--------------|---------|------------------------------------------------|
| <b>Zero Point Energy :</b>      | 163.83       | kJ/mol  | (ZPE)                                          |
| <b>Temperature Correction :</b> | 30.47        | kJ/mol  | (vibration + gas law + rotation + translation) |
| <b>Enthalpy Correction :</b>    | 194.30       | kJ/mol  | (ZPE + temperature correction)                 |
| <b>Enthalpy :</b>               | -2943.954520 | au      | (Electronic Energy + Enthalpy Correction)      |
| <b>Entropy :</b>                | 423.58       | J/mol•K |                                                |
| <b>Gibbs Energy :</b>           | -2944.002622 | au      | (Enthalpy - T*Entropy)                         |
| <b>C<sub>v</sub> :</b>          | 171.88       | J/mol•K |                                                |

**[Pt(CNO)Br(CNH)<sub>2</sub>]**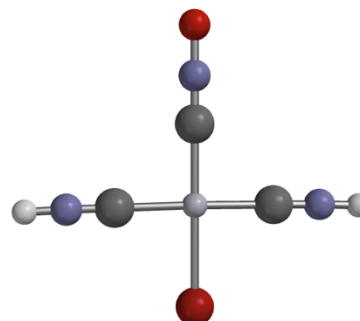**Figure S27:** Optimised structure of [Pt(CNO)Br(CNH)<sub>2</sub>] in the gas phase.**Table S51:** Cartesian coordinates for [Pt(CNO)Br(CNH)<sub>2</sub>]

| Atom | x         | y        | z         |
|------|-----------|----------|-----------|
| Pt   | -0.000495 | 0.000000 | -0.608509 |
| C    | 0.001922  | 0.000000 | 1.375403  |
| C    | 1.954706  | 0.000000 | -0.635789 |
| C    | -1.955658 | 0.000000 | -0.631740 |
| N    | -3.113953 | 0.000000 | -0.648267 |
| N    | 3.112986  | 0.000000 | -0.653090 |
| H    | -4.112150 | 0.000000 | -0.687967 |
| H    | 4.110846  | 0.000000 | -0.698366 |
| N    | 0.001174  | 0.000000 | 2.542395  |
| O    | 0.002222  | 0.000000 | 3.761430  |
| Br   | -0.001599 | 0.000000 | -3.115501 |

**Table S52:** Thermodynamic properties at 298.15 °K

|                                 |              |         |                                                |
|---------------------------------|--------------|---------|------------------------------------------------|
| <b>Zero Point Energy :</b>      | 129.02       | kJ/mol  | (ZPE)                                          |
| <b>Temperature Correction :</b> | 29.91        | kJ/mol  | (vibration + gas law + rotation + translation) |
| <b>Enthalpy Correction :</b>    | 158.94       | kJ/mol  | (ZPE + temperature correction)                 |
| <b>Enthalpy :</b>               | -3047.812192 | au      | (Electronic Energy + Enthalpy Correction)      |
| <b>Entropy :</b>                | 430.57       | J/mol•K |                                                |
| <b>Gibbs Energy :</b>           | -3047.861087 | au      | (Enthalpy - T*Entropy)                         |
| <b>C<sub>v</sub> :</b>          | 167.16       | J/mol•K |                                                |

**[PtBr{C≡W(CO)<sub>2</sub>Tp}(CNH)<sub>2</sub>]**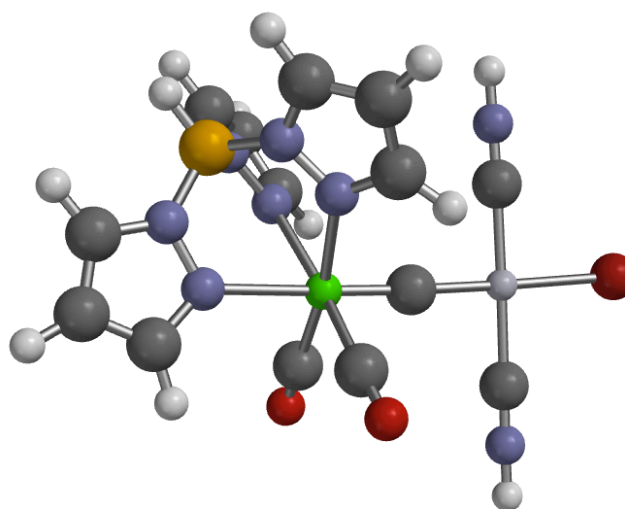**Figure S28:** Optimised structure of [PtBr{C≡W(CO)<sub>2</sub>Tp}(CNH)<sub>2</sub>] in the gas phase.

**Table S53:** Cartesian coordinates for [PtBr{C≡W(CO)<sub>2</sub>Tp}(CNH)<sub>2</sub>]

| Atom | X         | Y         | Z         |
|------|-----------|-----------|-----------|
| Pt   | -1.320992 | -3.858599 | 0.9879    |
| W    | 0.324585  | -0.849468 | -0.558341 |
| O    | 2.974028  | -2.561671 | -0.497801 |
| O    | -0.452901 | -2.235686 | -3.276204 |
| N    | 1.416231  | 0.979435  | -1.542397 |
| N    | 1.214802  | 2.231638  | -1.077881 |
| N    | 0.864152  | 0.349411  | 1.267628  |
| N    | 0.738228  | 1.691964  | 1.322461  |
| N    | -1.336133 | 0.652711  | -0.589083 |
| N    | -1.148401 | 1.955971  | -0.288426 |
| C    | -0.489334 | -2.271485 | 0.213434  |
| C    | 2.008025  | -1.924806 | -0.528624 |
| C    | -0.15554  | -1.692769 | -2.293746 |
| C    | 2.291682  | 1.072465  | -2.542623 |
| C    | 2.669861  | 2.404346  | -2.737246 |
| H    | 3.357512  | 2.799634  | -3.468606 |
| C    | 1.95772   | 3.104762  | -1.7798   |
| C    | 1.308694  | -0.050988 | 2.459045  |
| C    | 1.474173  | 1.047318  | 3.308181  |
| H    | 1.827503  | 1.052175  | 4.32768   |
| C    | 1.100189  | 2.135298  | 2.538541  |
| C    | -2.632342 | 0.495967  | -0.859049 |
| C    | -3.304131 | 1.71485   | -0.732978 |
| H    | -4.353325 | 1.912123  | -0.88751  |
| C    | -2.317889 | 2.614091  | -0.368721 |
| B    | 0.246887  | 2.485875  | 0.093061  |
| H    | 0.195807  | 3.660887  | 0.349097  |
| H    | 1.069907  | 3.191022  | 2.76438   |
| H    | 1.489187  | -1.10213  | 2.632361  |
| H    | 1.923614  | 4.159228  | -1.547902 |
| H    | 2.601457  | 0.180172  | -3.068244 |
| H    | -2.360463 | 3.673554  | -0.163899 |
| H    | -3.004794 | -0.482918 | -1.123595 |
| C    | -1.109196 | -4.744136 | -0.744543 |
| Br   | -2.426657 | -5.930887 | 2.00649   |
| C    | -1.508009 | -2.907977 | 2.686488  |
| N    | -1.606536 | -2.323998 | 3.684249  |
| N    | -0.974705 | -5.227219 | -1.789389 |
| H    | -0.845382 | -5.579456 | -2.715247 |
| H    | -1.707511 | -1.820706 | 4.540858  |

**Table S54:** Thermodynamic properties at 298.15 °K

|                         |              |         |                                               |
|-------------------------|--------------|---------|-----------------------------------------------|
| Zero Point Energy:      | 658.36       | kJ/mol  | (ZPE)                                         |
| Temperature Correction: | 65.34        | kJ/mol  | (vibration+ gas law + rotation + translation) |
| Enthalpy Correction:    | 723.70       | kJ/mol  | (ZPE + temperature correction)                |
| Enthalpy:               | -3914.405567 | au      | (Electronic Energy + Enthalpy Correction)     |
| Entropy:                | 670.26       | J/mol·K |                                               |
| Gibbs Energy:           | -3914.481681 | au      | (Enthalpy + T×Entropy)                        |
| C <sub>v</sub> :        | 451.72       | J/mol·K |                                               |

**[PtBr{C≡W(CO)<sub>2</sub>Tp}(CNMe)<sub>2</sub>]**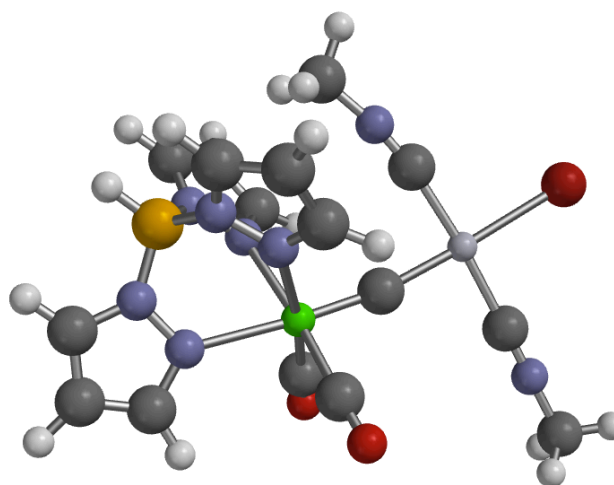**Figure S29:** Optimised structure of [PtBr{C≡W(CO)<sub>2</sub>Tp}(CNMe)<sub>2</sub>] in the gas phase.**Table S55:** Thermodynamic properties at 298.15 °K

|                        |              |         |                                                |
|------------------------|--------------|---------|------------------------------------------------|
| Zero Point Energy :    | 808.16       | kJ/mol  | (ZPE)                                          |
| Temperature Correction | 70.19        | kJ/mol  | (vibration + gas law + rotation + translation) |
| Enthalpy Correction :  | 878.34       | kJ/mol  | (ZPE + temperature correction)                 |
| Enthalpy :             | -3992.973669 | au      | (Electronic Energy + Enthalpy Correction)      |
| Entropy :              | 708.15       | J/mol·K |                                                |
| Gibbs Energy :         | -3993.054086 | au      | (Enthalpy - T*Entropy)                         |
| C <sub>v</sub> :       | 485.11       | J/mol·K |                                                |



**Table S56:** Cartesian coordinates for [PtBr{C≡W(CO)<sub>2</sub>Tp}(CNMe)<sub>2</sub>]

| Atom | x         | y         | z         |
|------|-----------|-----------|-----------|
| Pt   | -1.195090 | -3.289053 | 0.725338  |
| W    | 0.589599  | -0.403559 | -0.850873 |
| O    | 3.274444  | -2.037977 | -1.094348 |
| O    | -0.248240 | -1.382266 | -3.728282 |
| N    | 1.510978  | 1.629995  | -1.585778 |
| N    | 1.255400  | 2.788393  | -0.941302 |
| N    | 1.113595  | 0.556124  | 1.127849  |
| N    | 0.938004  | 1.872235  | 1.374879  |
| N    | -1.169869 | 0.987907  | -0.561345 |
| N    | -1.041560 | 2.245521  | -0.085504 |
| C    | -0.198963 | -1.892311 | -0.192772 |
| C    | 2.294750  | -1.424668 | -1.016882 |
| C    | 0.070420  | -1.006375 | -2.679517 |
| C    | 2.316103  | 1.924589  | -2.605881 |
| C    | 2.591536  | 3.295864  | -2.631533 |
| H    | 3.206557  | 3.837384  | -3.333433 |
| C    | 1.893735  | 3.803371  | -1.550445 |
| C    | 1.568108  | 0.004542  | 2.253453  |
| C    | 1.692116  | 0.975398  | 3.254134  |
| H    | 2.044821  | 0.843394  | 4.265394  |
| C    | 1.282432  | 2.149734  | 2.645137  |
| C    | -2.473160 | 0.763518  | -0.728680 |
| C    | -3.210954 | 1.892881  | -0.355482 |
| H    | -4.281475 | 2.024760  | -0.387903 |
| C    | -2.254870 | 2.811760  | 0.044065  |
| B    | 0.345652  | 2.806292  | 0.296157  |
| H    | 0.237055  | 3.924635  | 0.728936  |
| H    | 1.215301  | 3.160873  | 3.019130  |
| H    | 1.777074  | -1.055210 | 2.278565  |
| H    | 1.803232  | 4.810897  | -1.171590 |
| H    | 2.653527  | 1.138443  | -3.266764 |
| H    | -2.347091 | 3.825881  | 0.404416  |
| H    | -2.803851 | -0.194710 | -1.102590 |
| C    | -0.601124 | -4.661719 | -0.539647 |
| C    | -1.718764 | -1.796069 | 1.897656  |
| N    | -1.935447 | -0.813943 | 2.472303  |
| N    | -0.245006 | -5.459644 | -1.300907 |
| C    | -2.081996 | 0.480741  | 3.030457  |
| H    | -2.737465 | 0.432626  | 3.901856  |
| H    | -2.512020 | 1.140395  | 2.271691  |
| H    | -1.092920 | 0.845392  | 3.321208  |
| C    | 0.176001  | -6.444134 | -2.228861 |
| H    | 1.212492  | -6.715248 | -2.019915 |
| H    | 0.099804  | -6.037337 | -3.239468 |
| H    | -0.462776 | -7.324158 | -2.132060 |
| Br   | -2.550097 | -5.035164 | 2.019134  |

**[PtBr{C≡W(CO)<sub>2</sub>Tp}(CN<sup>t</sup>Bu)<sub>2</sub>]**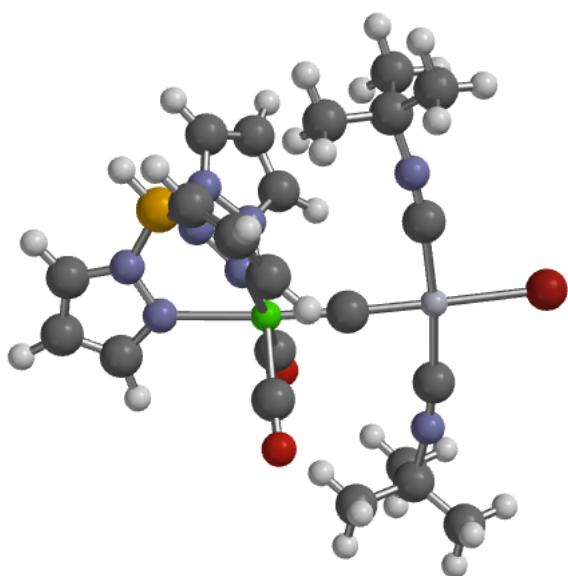**Figure S30:** Optimised structure of [PtBr{C≡W(CO)<sub>2</sub>Tp}(CN<sup>t</sup>Bu)<sub>2</sub>] in the gas phase.**Table S57:** Thermodynamic properties at 298.15 °K

|                         |              |         |                                               |
|-------------------------|--------------|---------|-----------------------------------------------|
| Zero Point Energy:      | 1231.63      | kJ/mol  | (ZPE)                                         |
| Temperature Correction: | 88.04        | kJ/mol  | (vibration+ gas law + rotation + translation) |
| Enthalpy Correction:    | 1319.68      | kJ/mol  | (ZPE + temperature correction)                |
| Enthalpy:               | -4228.655783 | au      | (Electronic Energy + Enthalpy Correction)     |
| Entropy:                | 811.59       | J/mol-K |                                               |
| Gibbs Energy:           | -4228.747947 | au      | (Enthalpy + T×Entropy)                        |
| C <sub>v</sub> :        | 624.96       | J/mol-K |                                               |

**Table S58:** Cartesian coordinates for [PtBr{C≡W(CO)<sub>2</sub>Tp}(CN<sup>t</sup>Bu)<sub>2</sub>]

| Atom | X         | Y         | Z         |
|------|-----------|-----------|-----------|
| Pt   | 2.155501  | 1.860762  | 0.581007  |
| W    | -0.286383 | -0.980869 | 0.560744  |
| Br   | 3.835884  | 3.786385  | 0.46626   |
| N    | -0.617956 | -0.954207 | -1.668101 |
| C    | 0.871445  | 0.408903  | 0.634912  |
| O    | 2.303477  | -2.76804  | 0.536058  |
| O    | -0.19007  | -1.040335 | 3.710073  |
| N    | -1.825839 | -1.16432  | -2.233761 |
| C    | 3.239535  | 0.827187  | 1.849817  |
| N    | -3.244307 | -0.251759 | -0.390274 |
| N    | -2.25957  | 0.098201  | 0.46444   |
| N    | -1.769226 | -2.791468 | 0.31478   |
| N    | 3.79793   | 0.112332  | 2.570489  |
| C    | -0.238368 | -1.037714 | 2.551222  |
| N    | -2.817139 | -2.718031 | -0.534127 |
| C    | 1.330786  | -2.130953 | 0.530734  |
| C    | 0.962658  | 2.702057  | -0.734853 |
| N    | 0.20199   | 3.08374   | -1.521559 |
| C    | -4.302138 | 0.561392  | -0.224338 |
| C    | -2.703484 | 1.139287  | -1.169066 |
| C    | -4.000891 | 1.47644   | 0.769649  |
| H    | -4.629322 | 2.265466  | 1.15325   |
| C    | 0.240383  | -0.706015 | -2.657706 |
| C    | -1.729985 | -1.051913 | -3.570492 |
| C    | -1.810811 | -3.998662 | 0.877463  |
| C    | -3.511511 | -3.868866 | -0.505464 |
| C    | -0.416449 | -0.756173 | -3.892451 |
| H    | 0.00648   | -0.612187 | -4.874988 |
| C    | -2.900956 | -4.727651 | 0.391397  |
| H    | -3.199744 | -5.730878 | 0.6543    |
| C    | 4.386814  | -0.887409 | 3.428354  |
| C    | 5.313716  | -1.745082 | 2.559278  |
| H    | 4.747449  | -2.230623 | 1.760254  |
| H    | 5.772509  | -2.517801 | 3.183775  |
| H    | 6.107942  | -1.135297 | 2.118148  |
| B    | -3.066446 | -1.442069 | -1.3578   |
| H    | -4.045148 | -1.566816 | -2.047783 |
| C    | 5.159997  | -0.162113 | 4.533564  |
| H    | 4.490955  | 0.470324  | 5.123963  |
| H    | 5.94983   | 0.463936  | 4.110132  |
| H    | 5.615947  | -0.903366 | 5.196208  |
| C    | -0.8009   | 3.431272  | -2.498188 |
| C    | 3.237021  | -1.725353 | 4.000052  |
| H    | 2.537634  | -1.101415 | 4.56281   |
| H    | 3.650718  | -2.486716 | 4.666549  |
| H    | 2.689535  | -2.221044 | 3.195329  |
| C    | -0.203341 | 3.166742  | -3.884935 |
| H    | 0.701581  | 3.760706  | -4.039086 |
| H    | -0.93693  | 3.44101   | -4.648541 |
| H    | 0.038149  | 2.106388  | -3.998825 |
| C    | -1.144082 | 4.912267  | -2.310769 |
| H    | -1.53451  | 5.094858  | -1.3058   |
| H    | -1.907171 | 5.198827  | -3.040193 |
| H    | -0.260673 | 5.538681  | -2.462591 |
| C    | -2.014132 | 2.531808  | -2.238209 |
| H    | -1.733301 | 1.478016  | -2.309197 |
| H    | -2.785236 | 2.742689  | -2.985423 |
| H    | -2.432651 | 2.711782  | -1.244096 |
| H    | -5.191216 | 0.426356  | -0.82243  |
| H    | -2.064816 | 1.584487  | 1.918464  |
| H    | -1.05752  | -4.279051 | 1.599938  |
| H    | -4.388098 | -3.992265 | -1.124082 |
| H    | 1.27619   | -0.504367 | -2.424023 |
| H    | -2.601735 | -1.191564 | -4.192391 |

**[PtBr{C≡W(CO)<sub>2</sub>Tp}(CNPh)<sub>2</sub>]**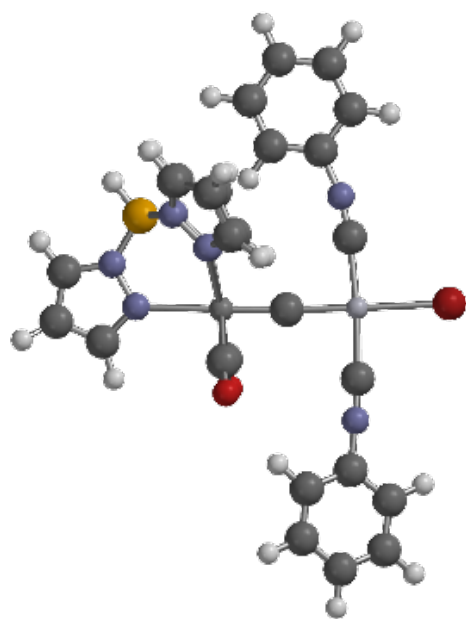**Figure S31:** Optimised structure of [PtBr{C≡W(CO)<sub>2</sub>Tp}(CNPh)<sub>2</sub>] in the gas phase.**Table S59:** Thermodynamic properties at 298.15 °K

|                                |              |         |                                               |
|--------------------------------|--------------|---------|-----------------------------------------------|
| <b>Zero Point Energy:</b>      | 1072.50      | kJ/mol  | (ZPE)                                         |
| <b>Temperature Correction:</b> | 82.45        | kJ/mol  | (vibration+ gas law + rotation + translation) |
| <b>Enthalpy Correction:</b>    | 1154.95      | kJ/mol  | (ZPE + temperature correction)                |
| <b>Enthalpy:</b>               | -4376.220141 | au      | (Electronic Energy + Enthalpy Correction)     |
| <b>Entropy:</b>                | 779.72       | J/mol-K |                                               |
| <b>Gibbs Energy:</b>           | -4376.308685 | au      | (Enthalpy + T×Entropy)                        |
| <b>C<sub>v</sub>:</b>          | 602.23       | J/mol-K |                                               |

**Table S60:** Cartesian coordinates for [PtBr{C≡W(CO)<sub>2</sub>Tp}(CNPh)<sub>2</sub>]

| Atom | X         | Y         | Z         |
|------|-----------|-----------|-----------|
| Pt   | -0.714405 | 0.132281  | -3.012096 |
| W    | -0.696452 | 0.110235  | 0.745147  |
| Br   | -0.633233 | 0.14211   | -5.569484 |
| O    | -3.062431 | -1.955913 | 0.533711  |
| O    | -2.829759 | 2.431898  | 0.675333  |
| N    | -0.595153 | 0.038432  | 3.09347   |
| N    | 0.59126   | -0.017688 | 3.73589   |
| N    | 1.054611  | 1.481217  | 1.117789  |
| N    | 1.98511   | 1.239548  | 2.068019  |
| N    | 0.962034  | -1.385852 | 1.039856  |
| N    | 1.911213  | -1.249148 | 1.992507  |
| N    | 2.374965  | 0.164785  | -2.604123 |
| N    | -3.826413 | -0.039217 | -2.938903 |
| C    | -0.734633 | 0.13542   | -1.064703 |
| C    | -2.181904 | -1.2045   | 0.637331  |
| C    | -2.048686 | 1.578437  | 0.717858  |
| C    | -1.543127 | 0.028976  | 4.029861  |
| C    | -0.97029  | -0.033725 | 5.304399  |
| C    | 0.391696  | -0.062041 | 5.064715  |
| C    | 1.422257  | 2.597028  | 0.485654  |
| C    | 2.611531  | 3.092204  | 1.028128  |
| H    | 3.157636  | 3.974403  | 0.732809  |
| C    | 2.930155  | 2.196252  | 2.032707  |
| C    | 1.268873  | -2.475992 | 0.33523   |
| C    | 2.436906  | -3.061652 | 0.832411  |
| H    | 2.935866  | -3.949737 | 0.477244  |
| C    | 2.807661  | -2.247044 | 1.887152  |
| C    | 1.236503  | 0.171618  | -2.840009 |
| C    | 3.653087  | 0.150646  | -2.067112 |
| C    | 3.77706   | 0.058149  | -0.681636 |
| C    | 5.049142  | 0.03834   | -0.127214 |
| H    | 5.155299  | -0.030771 | 0.950566  |
| C    | 6.173409  | 0.109802  | -0.946717 |
| C    | 6.029785  | 0.201498  | -2.330069 |
| H    | 6.906476  | 0.255937  | -2.967043 |
| C    | 4.764335  | 0.222627  | -2.904077 |
| C    | -2.669714 | 0.036757  | -3.009283 |
| C    | -5.199304 | -0.153844 | -2.791566 |
| C    | -6.032033 | 0.24857   | -3.834275 |
| C    | -7.406718 | 0.133783  | -3.66962  |
| H    | -8.069006 | 0.442545  | -4.471636 |
| C    | -7.931108 | -0.375572 | -2.483683 |
| C    | -7.082262 | -0.775559 | -1.453829 |
| H    | -7.491303 | -1.175501 | -0.531909 |
| C    | -5.70476  | -0.668361 | -1.597718 |
| B    | 1.907134  | -0.03115  | 2.942207  |
| H    | 2.852533  | -0.081036 | 3.68708   |
| H    | 0.635407  | -2.770067 | -0.489181 |
| H    | 3.641959  | -2.303128 | 2.570796  |
| H    | 3.758534  | 2.168671  | 2.725176  |
| H    | 0.812158  | 2.974779  | -0.32215  |
| H    | 1.232434  | -0.109504 | 5.741203  |
| H    | -2.583645 | 0.067211  | 3.739344  |
| H    | -1.471093 | -0.058482 | 6.260158  |
| H    | 7.166003  | 0.095718  | -0.507649 |
| H    | 4.628482  | 0.289376  | -3.977928 |
| H    | 2.885311  | 0.005896  | -0.067834 |
| H    | -5.600084 | 0.64214   | -4.747909 |
| H    | -9.006039 | -0.463416 | -2.36213  |
| H    | -5.023269 | -0.97839  | -0.812263 |

**[PtBr{C≡W(CO)<sub>2</sub>Tp}(CNPhMe-2)<sub>2</sub>]**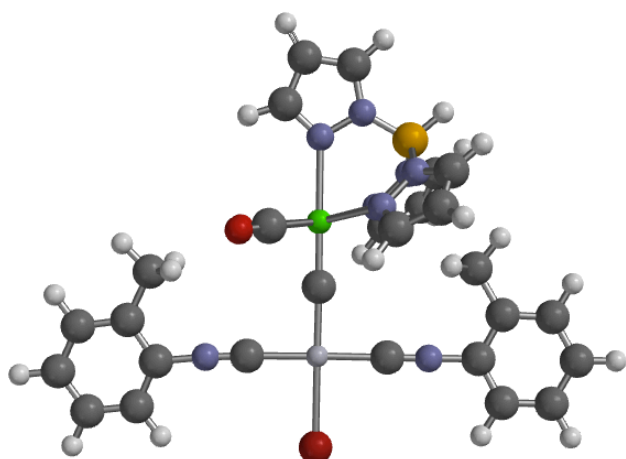

**Figure S32:** Optimised structure of [PtBr{C≡W(CO)<sub>2</sub>Tp}(CNPhMe-2)<sub>2</sub>] in the gas phase.

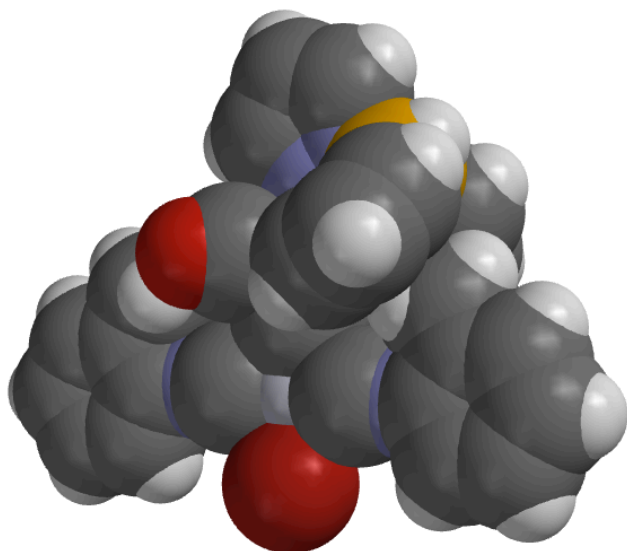

**Figure S33:** Optimised structure of [PtBr{C≡W(CO)<sub>2</sub>Tp}(CNPhMe-2)<sub>2</sub>] – Space-filling representation to demonstrate nestling of 2-tolyl substituent between pyridyl wings.

**Table S61:** Thermodynamic properties at 298.15 °K

|                         |              |         |                                               |
|-------------------------|--------------|---------|-----------------------------------------------|
| Zero Point Energy:      | 1212.27      | kJ/mol  | (ZPE)                                         |
| Temperature Correction: | 89.55        | kJ/mol  | (vibration+ gas law + rotation + translation) |
| Enthalpy Correction:    | 1301.82      | kJ/mol  | (ZPE + temperature correction)                |
| Enthalpy:               | -4454.786262 | au      | (Electronic Energy + Enthalpy Correction)     |
| Entropy:                | 824.22       | J/mol-K |                                               |
| Gibbs Energy:           | -4454.879859 | au      | (Enthalpy + T×Entropy)                        |
| C <sub>v</sub> :        | 652.96       | J/mol-K |                                               |

**Table S62:** Cartesian coordinates for [PtBr{C≡W(CO)<sub>2</sub>Tp}(CNPhMe-2)<sub>2</sub>]

| Atom | X         | Y         | Z         |
|------|-----------|-----------|-----------|
| Pt   | 0.573872  | -0.082648 | -2.649643 |
| W    | 0.637179  | 0.09757   | 1.102155  |
| Br   | 0.5353    | -0.234618 | -5.214384 |
| O    | 2.68593   | 2.46524   | 0.760677  |
| O    | 2.98643   | -1.987011 | 0.897425  |
| N    | 0.68764   | 0.157998  | 3.455551  |
| N    | -0.456003 | 0.100056  | 4.171644  |
| N    | -0.911298 | -1.451275 | 1.604569  |
| N    | -1.817537 | -1.287673 | 2.591488  |
| N    | -1.105464 | 1.451372  | 1.538221  |
| N    | -1.98872  | 1.207466  | 2.52956   |
| N    | -2.546508 | -0.180757 | -2.606967 |
| N    | 3.690532  | 0.023653  | -2.77978  |
| C    | 0.587932  | 0.026102  | -0.709701 |
| C    | 1.936816  | 1.590747  | 0.904628  |
| C    | 2.125407  | -1.213965 | 0.991343  |
| C    | 1.687777  | 0.25467   | 4.330526  |
| C    | 1.1937    | 0.260015  | 5.639027  |
| C    | -0.177659 | 0.159732  | 5.485712  |
| C    | -1.145818 | -2.641742 | 1.050619  |
| C    | -2.224067 | -3.266871 | 1.68532   |
| H    | -2.651882 | -4.233143 | 1.467803  |
| C    | -2.616045 | -2.367387 | 2.66111   |
| C    | -1.499105 | 2.572161  | 0.930562  |
| C    | -2.660241 | 3.067228  | 1.531875  |
| H    | -3.217429 | 3.95276   | 1.268564  |
| C    | -2.930822 | 2.166704  | 2.547054  |
| C    | -1.385065 | -0.147972 | -2.61907  |
| C    | -3.931442 | -0.206332 | -2.570854 |
| C    | -4.567456 | -0.223931 | -1.321039 |
| C    | -5.961337 | -0.242732 | -1.331608 |
| H    | -6.4901   | -0.255089 | -0.382855 |
| C    | -6.680402 | -0.245391 | -2.523348 |
| C    | -6.017602 | -0.229155 | -3.747895 |
| H    | -6.576736 | -0.230955 | -4.677458 |
| C    | -4.630282 | -0.209364 | -3.776993 |
| C    | 2.532005  | -0.014239 | -2.707647 |
| C    | 5.066407  | 0.06006   | -2.944088 |
| C    | 5.578283  | -0.079646 | -4.233831 |
| C    | 6.953169  | -0.046632 | -4.416735 |
| H    | 7.367467  | -0.15462  | -5.413451 |
| C    | 7.789498  | 0.124226  | -3.316436 |
| C    | 7.255478  | 0.262369  | -2.038721 |
| H    | 7.918803  | 0.396268  | -1.189171 |
| C    | 5.879304  | 0.234495  | -1.815752 |
| B    | -1.816946 | -0.012366 | 3.459258  |
| H    | -2.713222 | -0.05403  | 4.26253   |
| H    | -0.928141 | 2.951911  | 0.095692  |
| H    | -3.721867 | 2.138377  | 3.281782  |
| H    | -3.40154  | -2.416615 | 3.40061   |
| H    | -0.52967  | -2.975203 | 0.228093  |
| H    | -0.974457 | 0.12602   | 6.214208  |
| H    | 2.706556  | 0.3152    | 3.974078  |
| H    | 1.751837  | 0.32769   | 6.559914  |
| H    | -7.76552  | -0.25974  | -2.49513  |
| H    | -4.078833 | -0.195246 | -4.711092 |
| H    | 4.893573  | -0.211007 | -5.065122 |
| H    | 8.866107  | 0.150978  | -3.45324  |
| C    | -3.767815 | -0.228162 | -0.050383 |
| H    | -4.419937 | -0.162031 | 0.823586  |
| H    | -3.068036 | 0.612431  | -0.018856 |
| H    | -3.171907 | -1.143071 | 0.036637  |
| C    | 5.283232  | 0.380798  | -0.444526 |
| H    | 4.604239  | 1.238267  | -0.393854 |
| H    | 6.066386  | 0.525208  | 0.30389   |
| H    | 4.706055  | -0.507151 | -0.166081 |

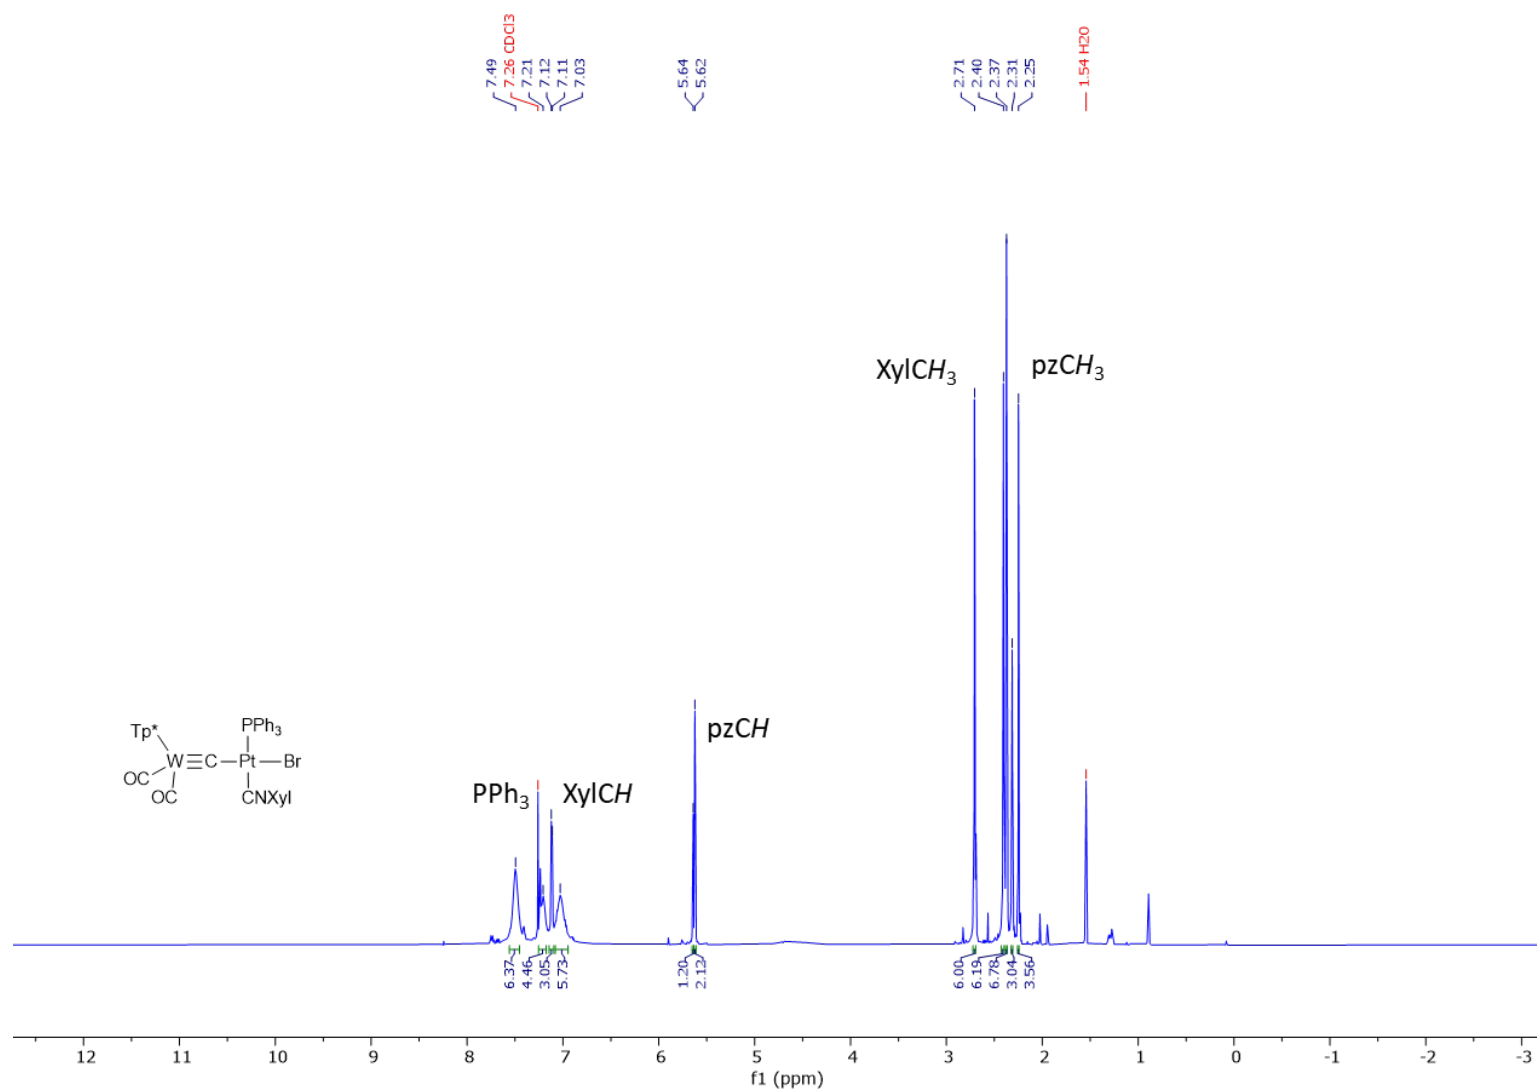

**Figure S34:**  $^1\text{H}$  NMR Spectrum of  $[\text{WPt}(\mu_2\text{-C})\text{Br}(\text{CNC}_6\text{H}_3\text{Me}_2\text{-2,6})(\text{CO})_2(\text{PPh}_3)(\text{Tp}^*)]$  (**4a**) (400 MHz,  $\text{CDCl}_3$ , 25 °C,  $\delta$ )

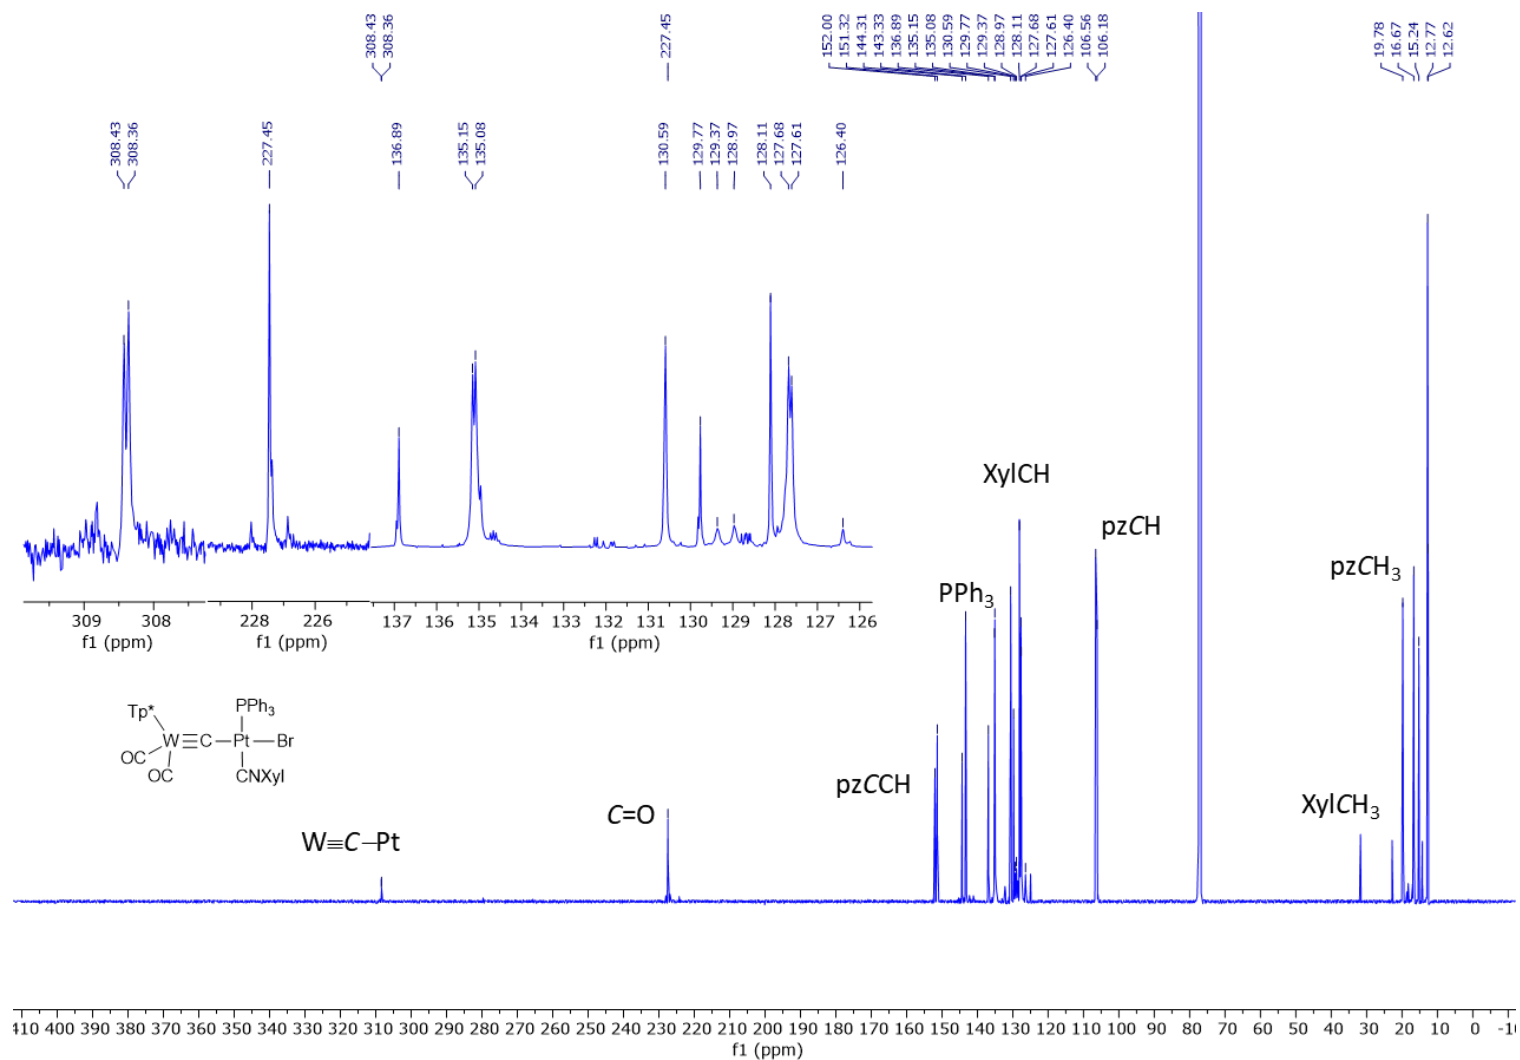

Figure S35:  $^{13}\text{C}\{^1\text{H}\}$  NMR Spectrum of  $[\text{WPt}(\mu_2\text{-C})\text{Br}(\text{CNC}_6\text{H}_3\text{Me}_2\text{-2,6})(\text{CO})_2(\text{PPh}_3)(\text{Tp}^*)]$  (4a) (151 MHz,  $\text{CDCl}_3$ , 25 °C,  $\delta$ )

## SUPPORTING INFORMATION

## Dalton Transactions

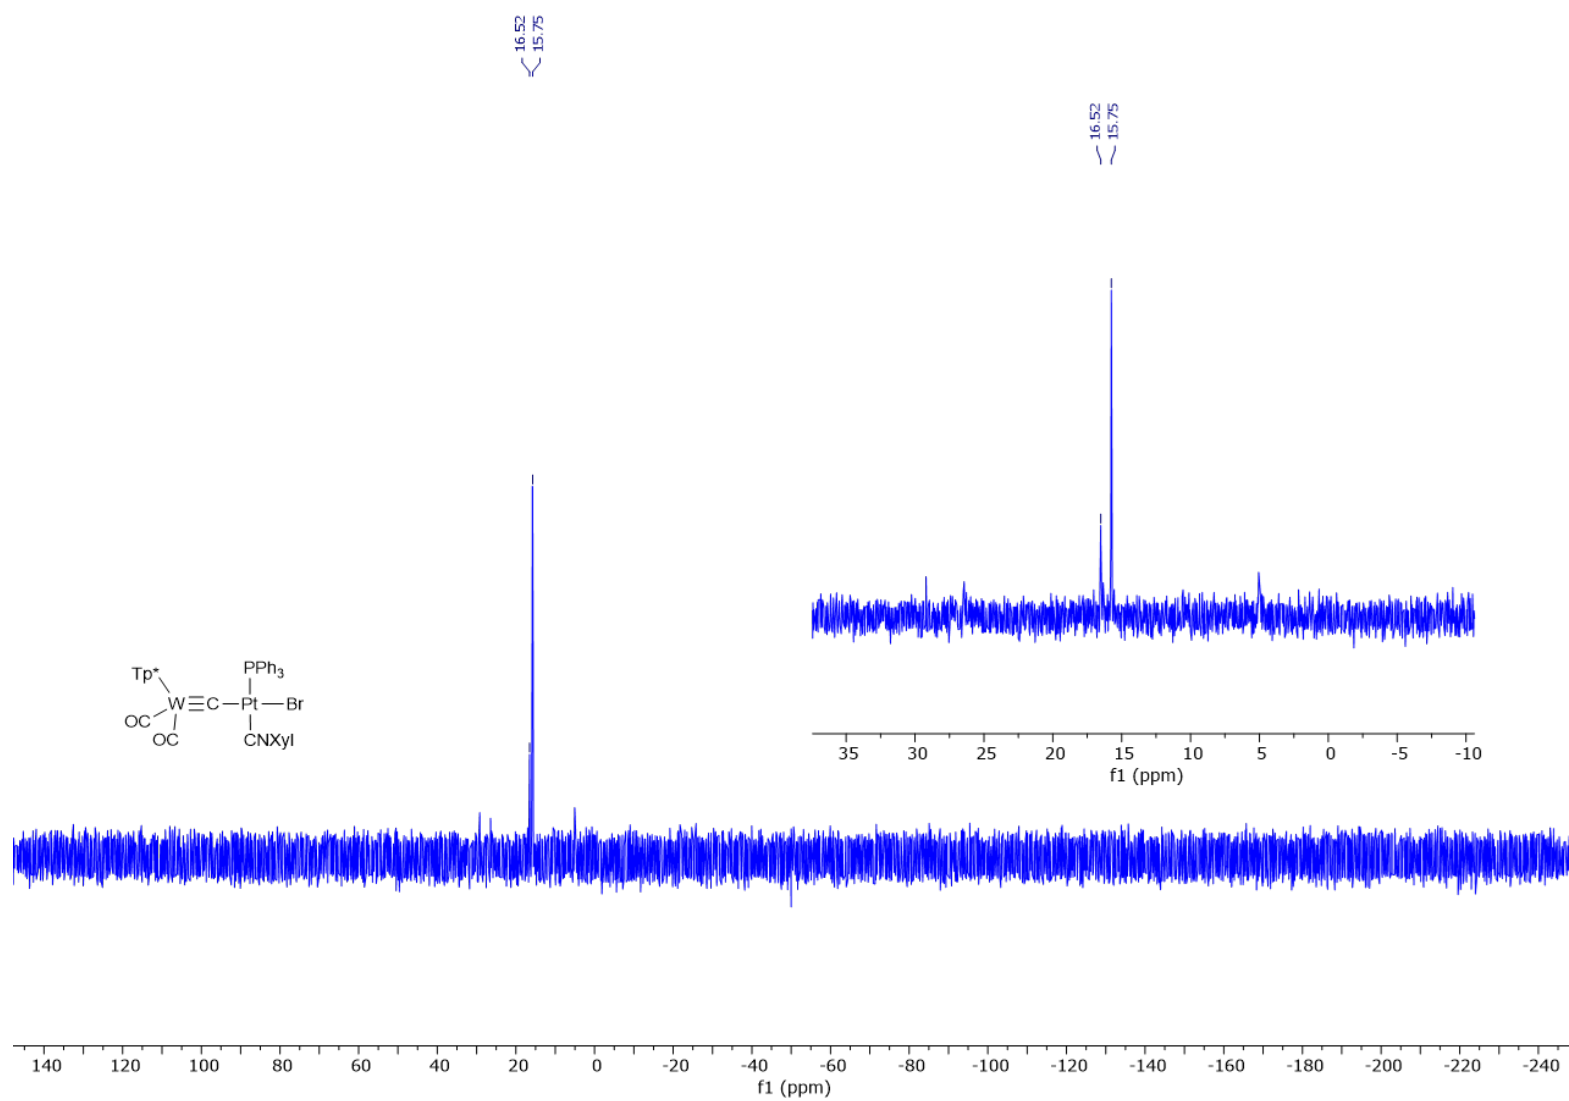

**Figure S36:**  $^{31}\text{P}\{^1\text{H}\}$  NMR Spectrum of  $[\text{WPt}(\mu_2\text{-C})\text{Br}(\text{CNC}_6\text{H}_3\text{Me}_2\text{-2,6})(\text{CO})_2(\text{PPh}_3)(\text{Tp}^*)]$  (**4a**) (162 MHz,  $\text{CDCl}_3$ , 25 °C,  $\delta$ )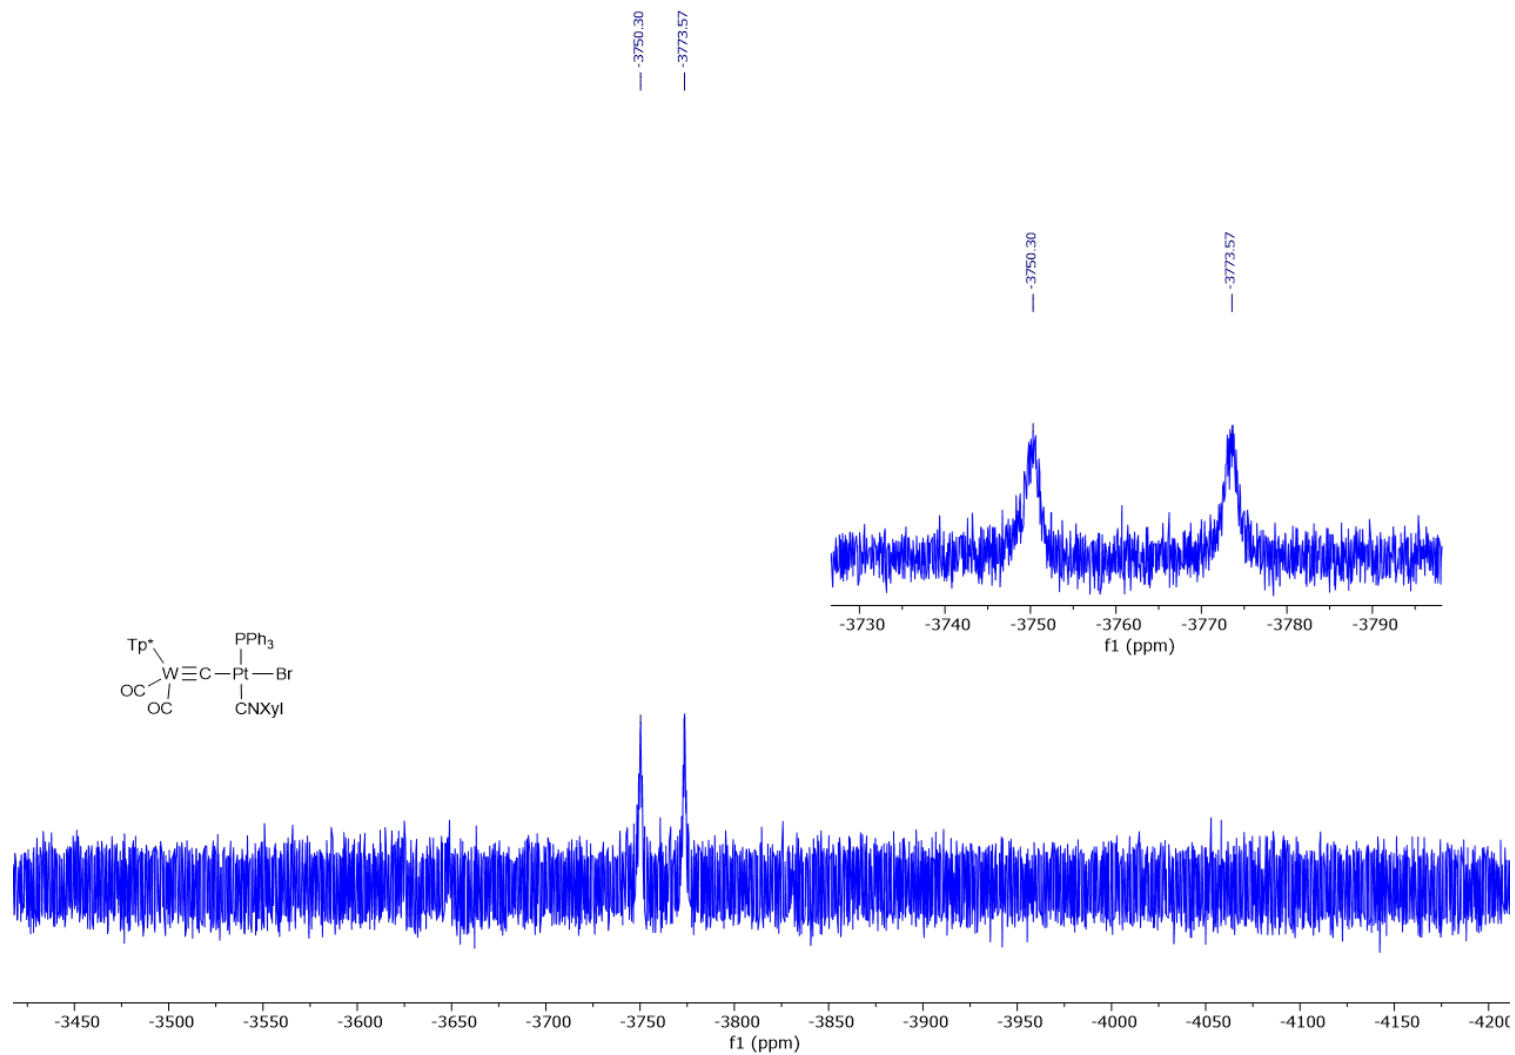**Figure S37:**  $^{195}\text{Pt}\{^1\text{H}\}$  NMR Spectrum of  $[\text{WPt}(\mu_2\text{-C})\text{Br}(\text{CNC}_6\text{H}_3\text{Me}_2\text{-2,6})(\text{CO})_2(\text{PPh}_3)(\text{Tp}^*)]$  (**4a**) (86 MHz,  $\text{CDCl}_3$ , 25 °C,  $\delta$ )

## SUPPORTING INFORMATION

Dalton Transactions

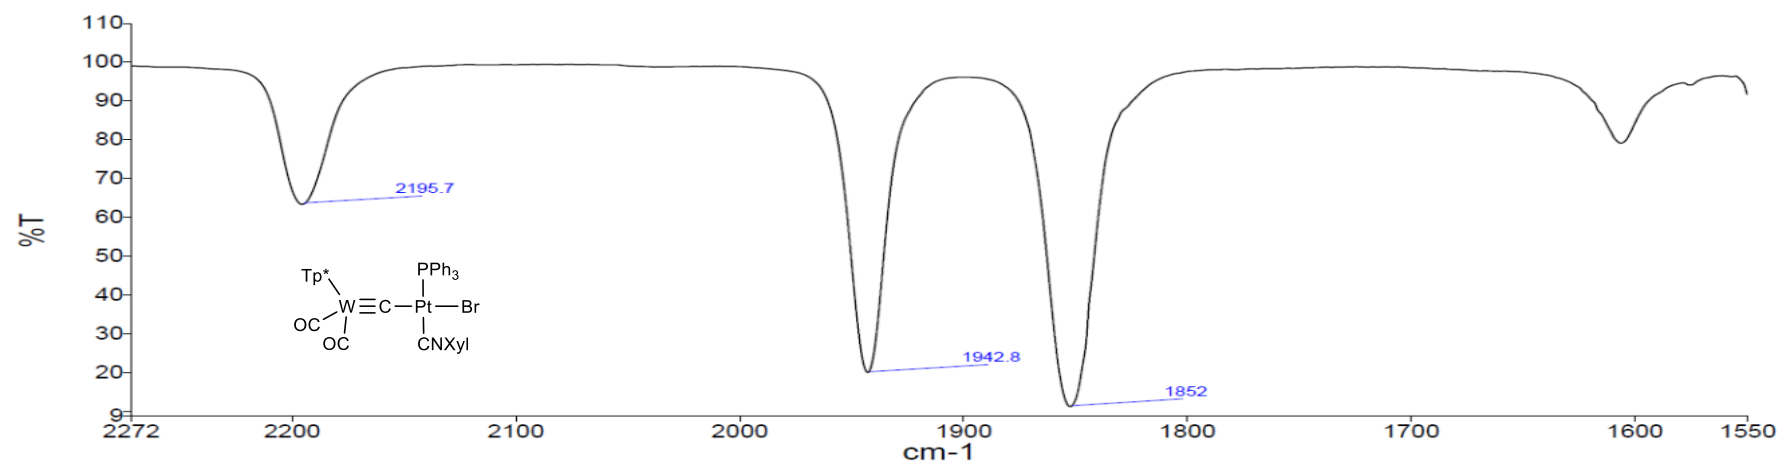

Figure S38: Infrared Spectrum of [WPt(μ<sub>2</sub>-C)Br(CNC<sub>6</sub>H<sub>3</sub>Me<sub>2</sub>-2,6)(CO)<sub>2</sub>(PPh<sub>3</sub>)(Tp\*)] (4a) (CH<sub>2</sub>Cl<sub>2</sub>, 25 °C, v)

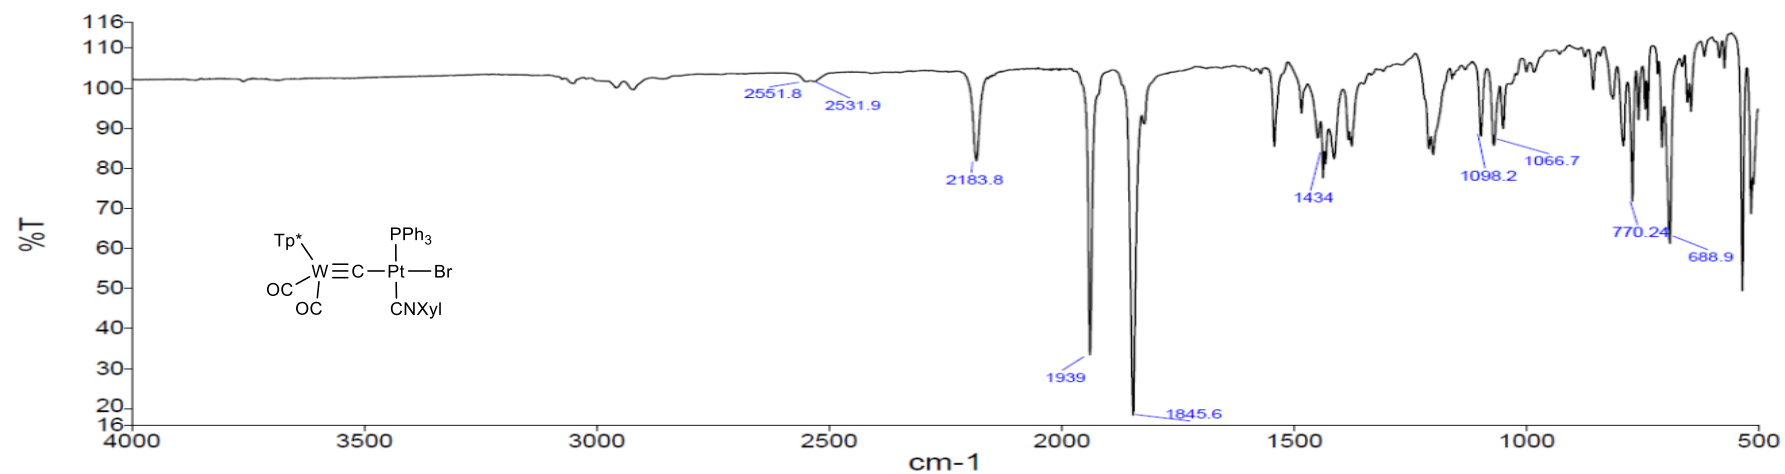

Figure S39: Infrared Spectrum of [WPt(μ<sub>2</sub>-C)Br(CNC<sub>6</sub>H<sub>3</sub>Me<sub>2</sub>-2,6)(CO)<sub>2</sub>(PPh<sub>3</sub>)(Tp\*)] (4a) (ATR, 25 °C, v)



## Elemental Composition Report

## Single Mass Analysis

Tolerance = 3.0 PPM / DBE: min = -1.5, max = 30.0

Element prediction: Off

Number of isotope peaks used for i-FIT = 3

Monoisotopic Mass, Even Electron Ions

872 formula(e) evaluated with 1 results within limits (up to 50 best isotopic matches for each mass)

Elements Used:

C: 0-50 H: 0-50 11B: 1-1 N: 0-7 O: 0-2 P: 0-1 79Br: 0-1 81Br: 0-1 184W: 0-1 195Pt: 0-1

LB-5-90/AJ

66373

0127 55 (0.126) Cm (53:77)

SYNAPT G2-Si#NotSet

Page 1

11-Feb-2021

15:13:38

1: TOF MS ES+

4.91e+005

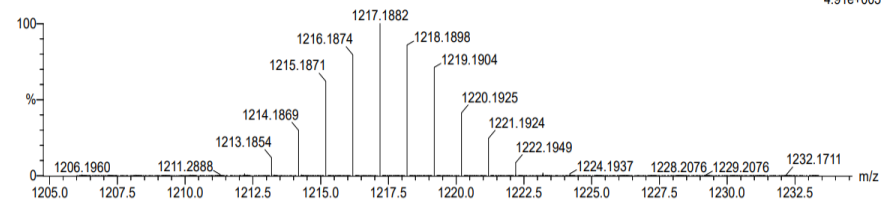

Minimum: -1.5  
Maximum: 3.0 3.0 30.0

| Mass      | Calc. Mass | mDa  | PPM  | DBE  | i-FIT  | Norm | Conf (%) | Formula                             |
|-----------|------------|------|------|------|--------|------|----------|-------------------------------------|
| 1216.1874 | 1216.1884  | -1.0 | -0.8 | 29.5 | 1165.8 | n/a  | n/a      | C45 H46 11B N7 O2 P 79Br 184W 195Pt |

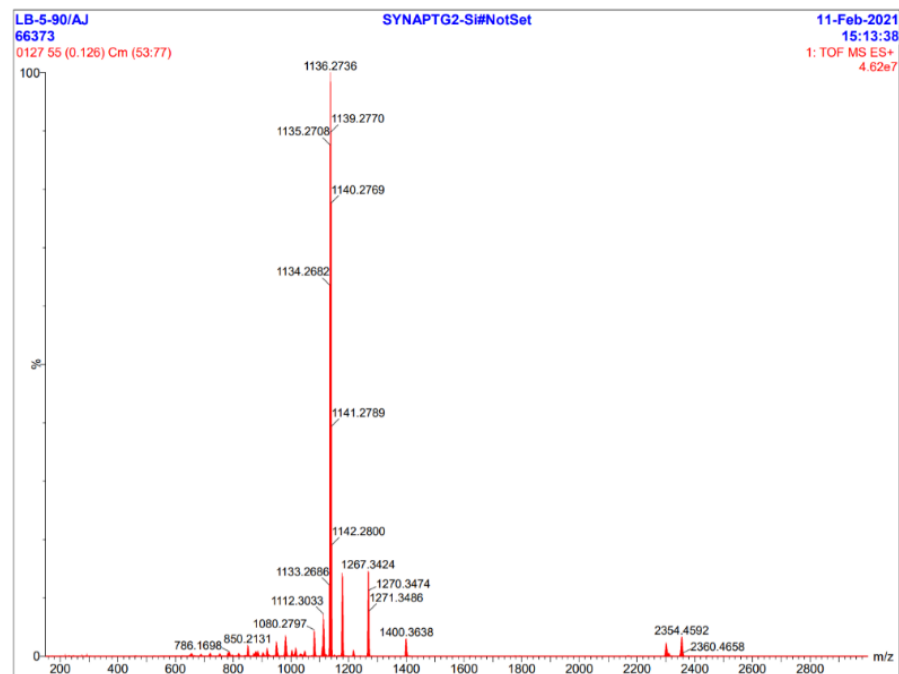

Figure S40: Mass Spectrum of [WPt(μ₂-C)Br(CNC₆H₃Me₂-2,6)(CO)₂(PPh₃)(Tp\*)] (4a)

## SUPPORTING INFORMATION

## Dalton Transactions

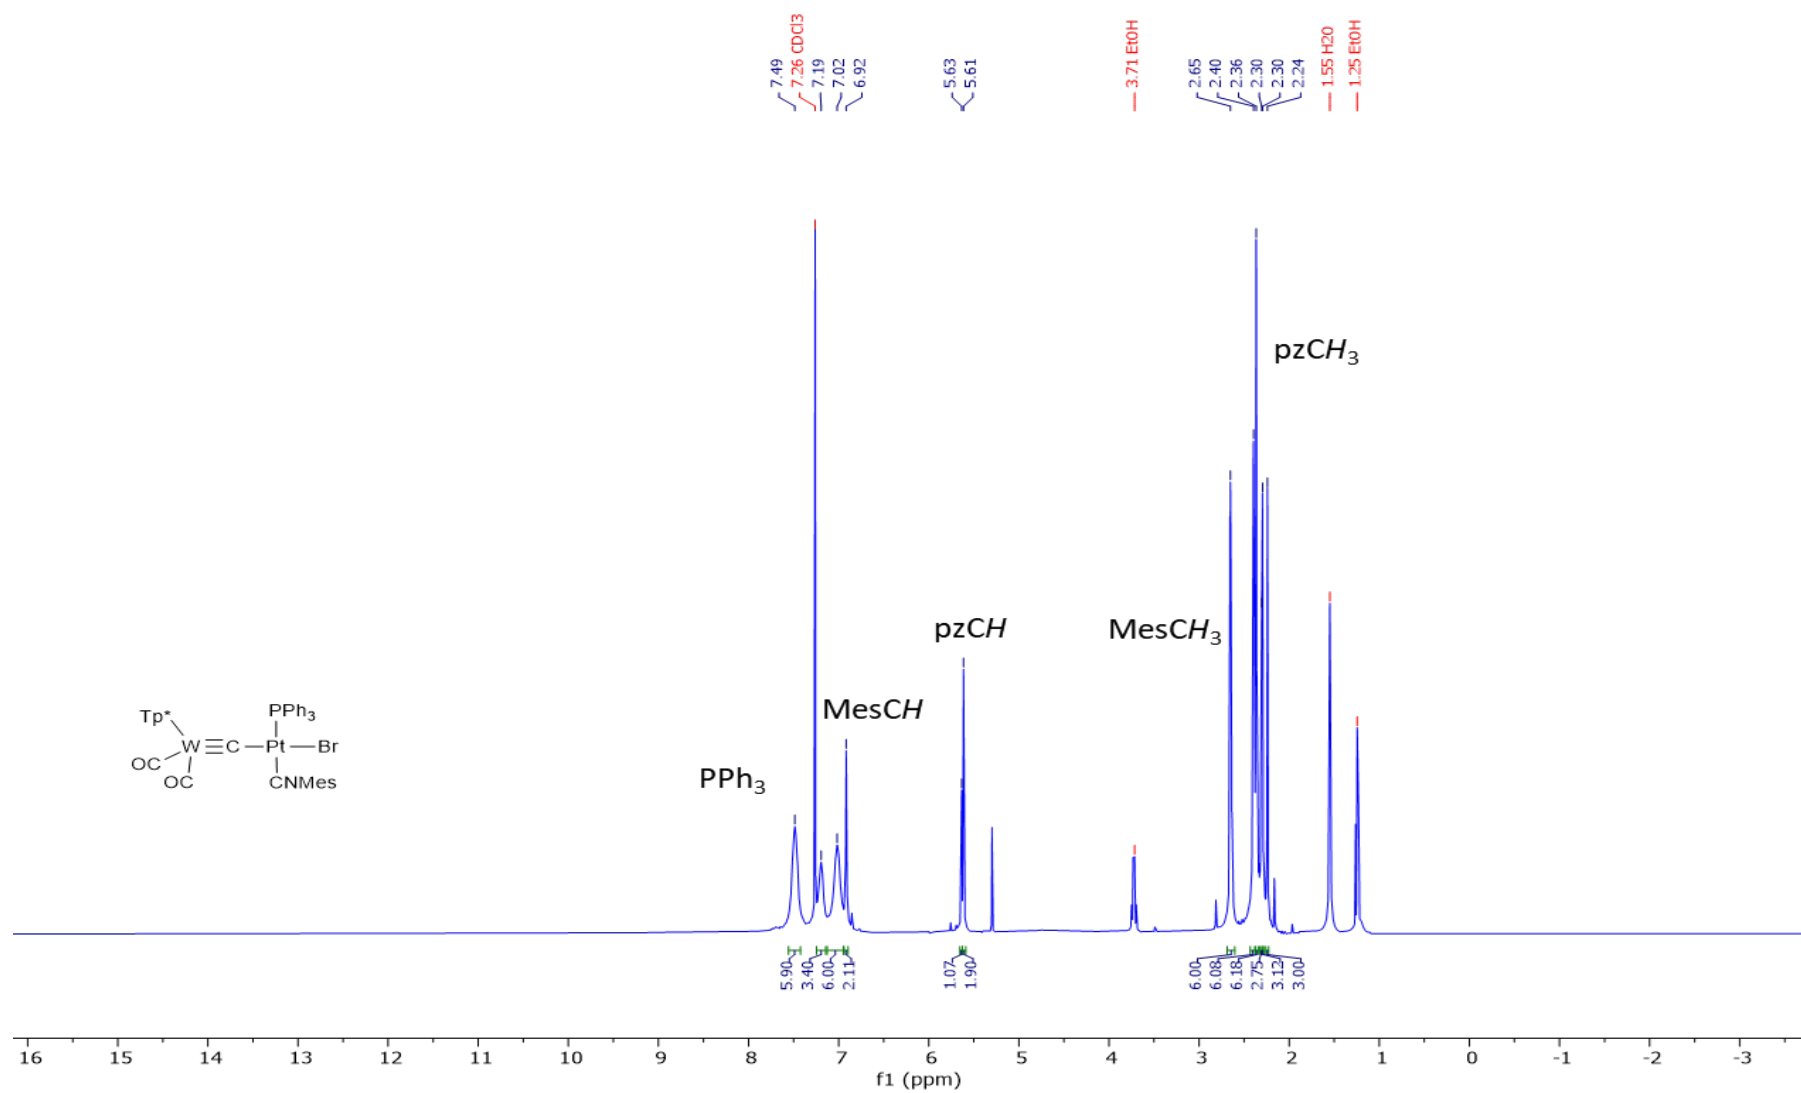

Figure S41:  $^1\text{H}$  NMR Spectrum of  $[\text{W}(\text{Tp}^*)(\mu_2\text{-C})\text{Br}(\text{CNC}_6\text{H}_2\text{Me}_3\text{-}2,4,6)(\text{CO})_2(\text{PPh}_3)(\text{Tp}^*)]$  (**4b**) (400 MHz,  $\text{CDCl}_3$ , 25 °C,  $\delta$ )

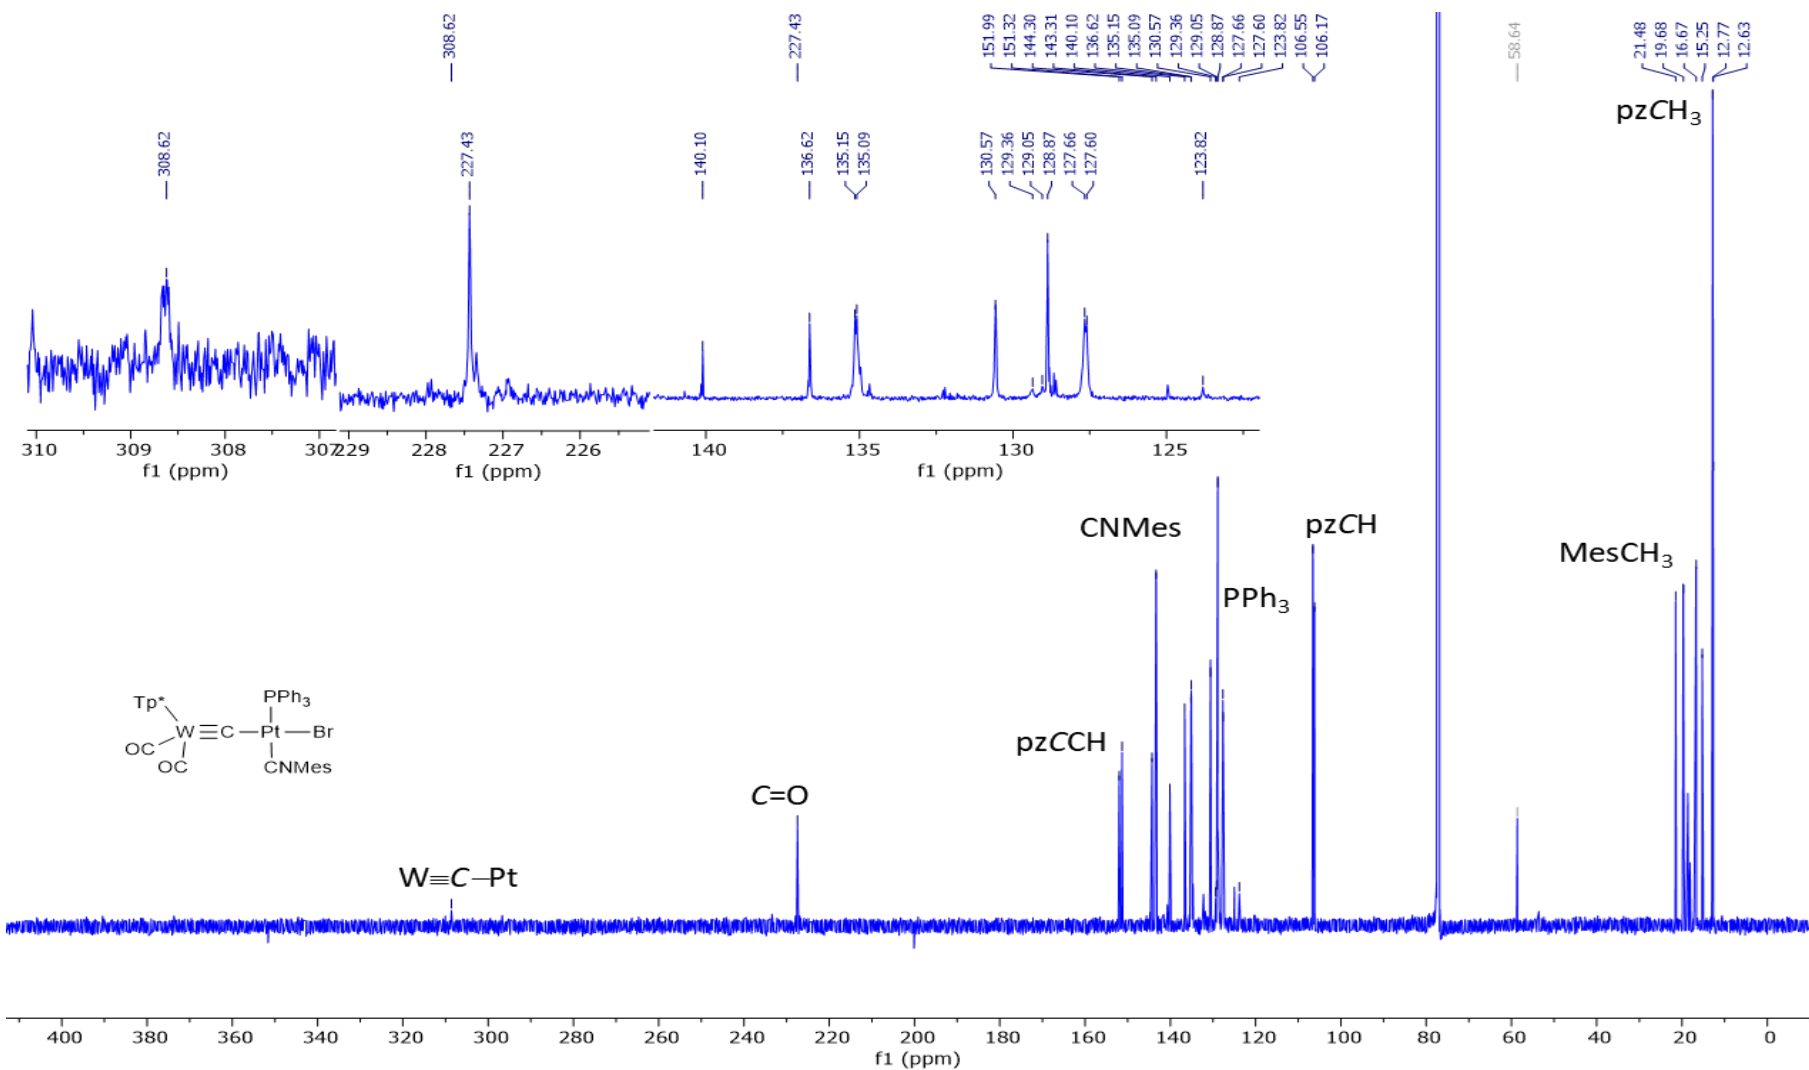

## SUPPORTING INFORMATION

## Dalton Transactions

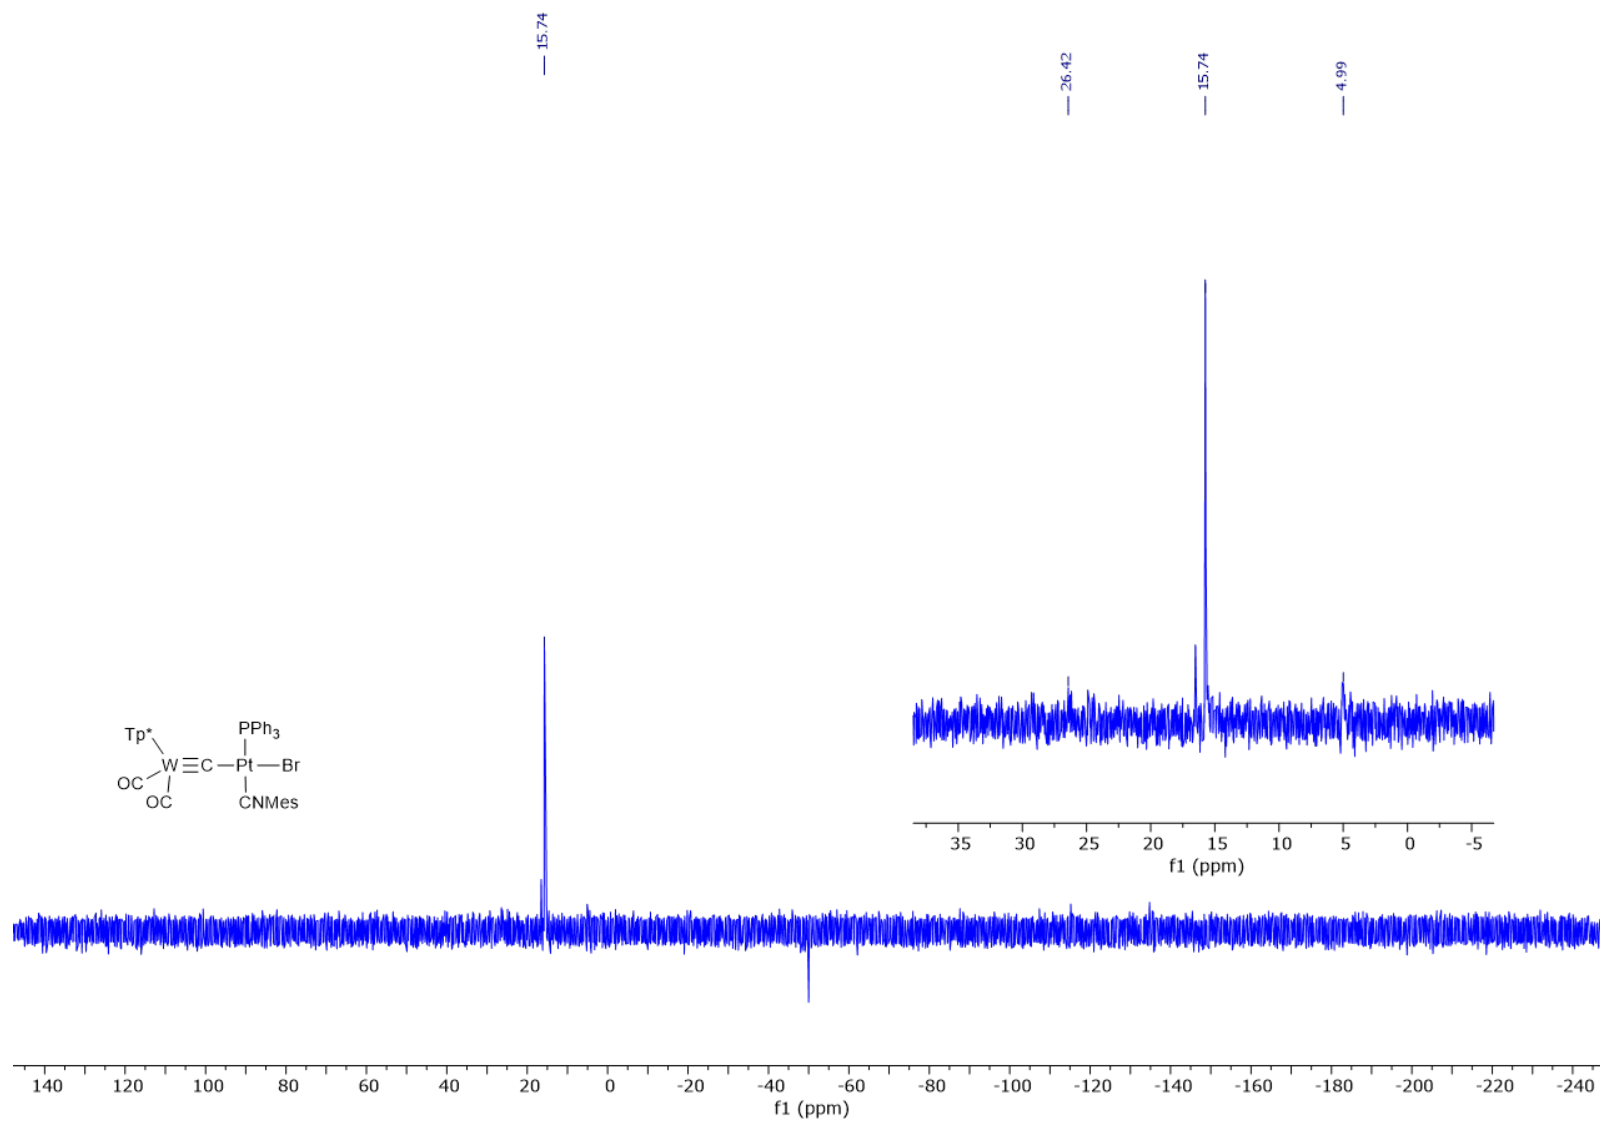

**Figure S43:**  $^{31}\text{P}\{^1\text{H}\}$  NMR Spectrum of  $[\text{WPt}(\mu_2\text{-C})\text{Br}(\text{CNC}_6\text{H}_2\text{Me}_3\text{-2,4,6})(\text{CO})_2(\text{PPh}_3)(\text{Tp}^*)]$  (**4b**) (162 MHz,  $\text{CDCl}_3$ , 25 °C,  $\delta$ )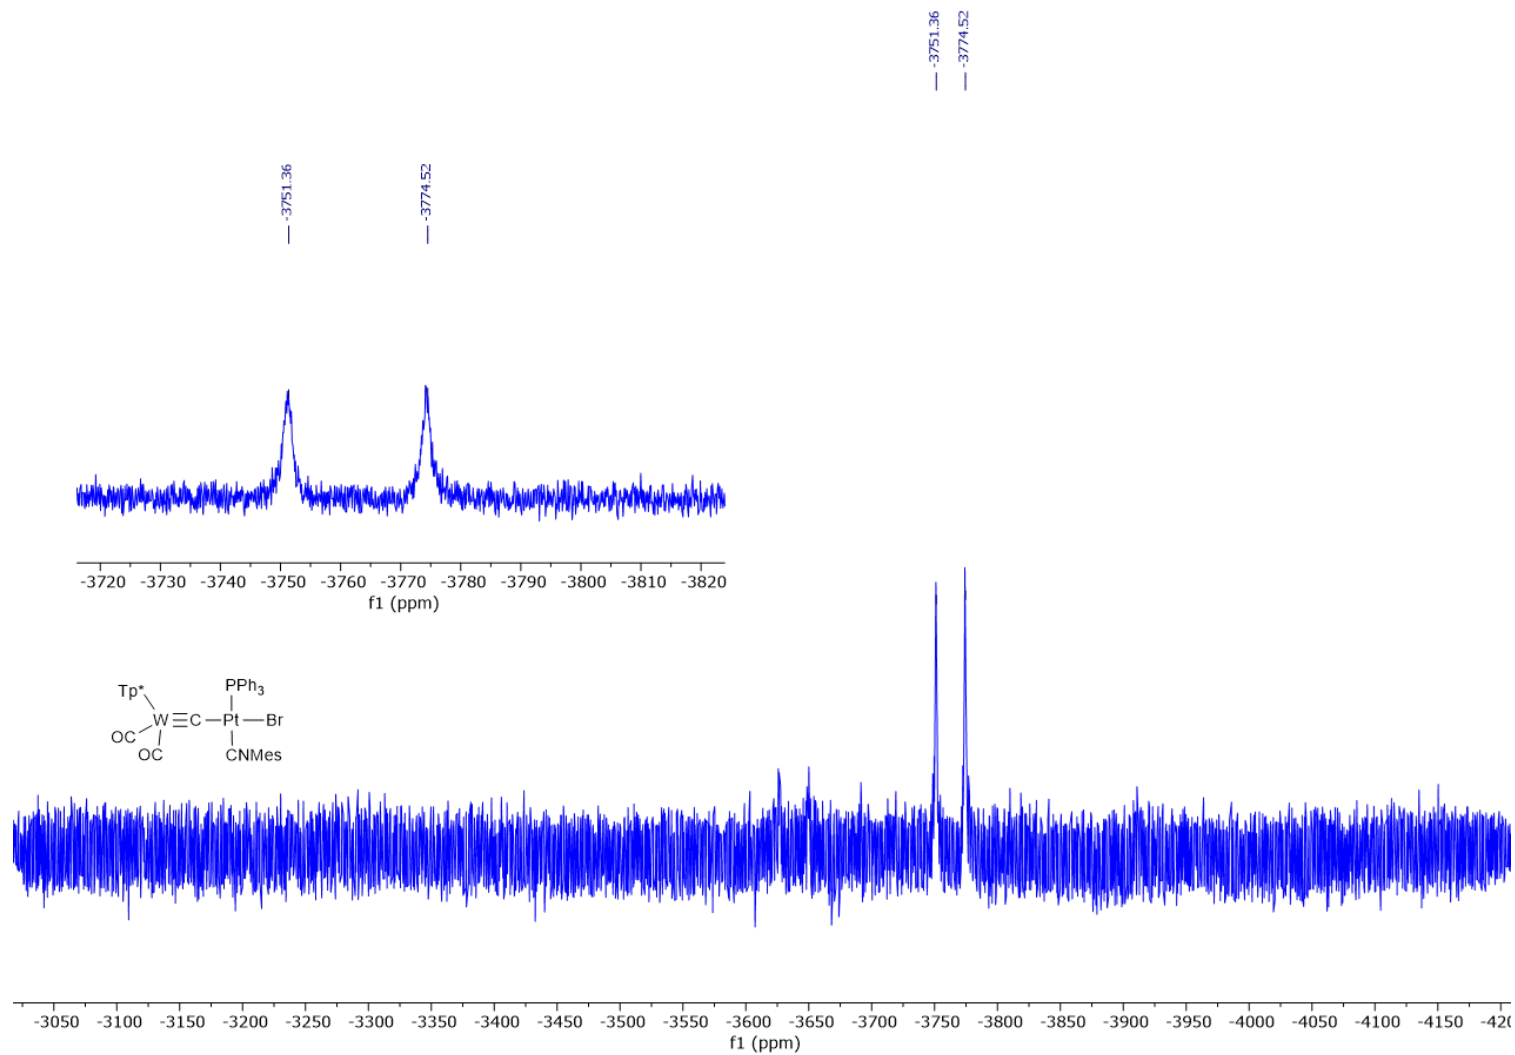

## SUPPORTING INFORMATION

## Dalton Transactions

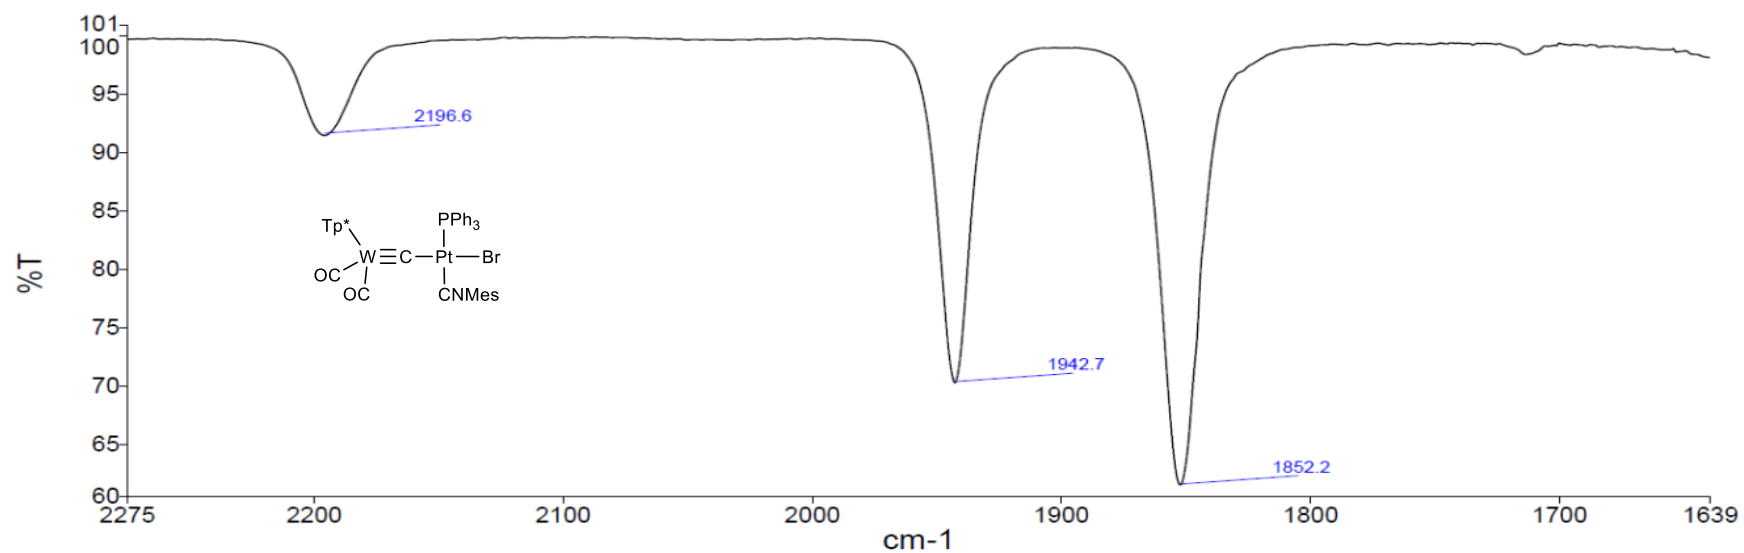

Figure S45: Infrared Spectrum of [WPt(μ₂-C)Br(CNC₆H₂Me₃-2,4,6)(CO)₂(PPh₃)(Tp\*)] (4b) (CH₂Cl₂, 25 °C, ν)

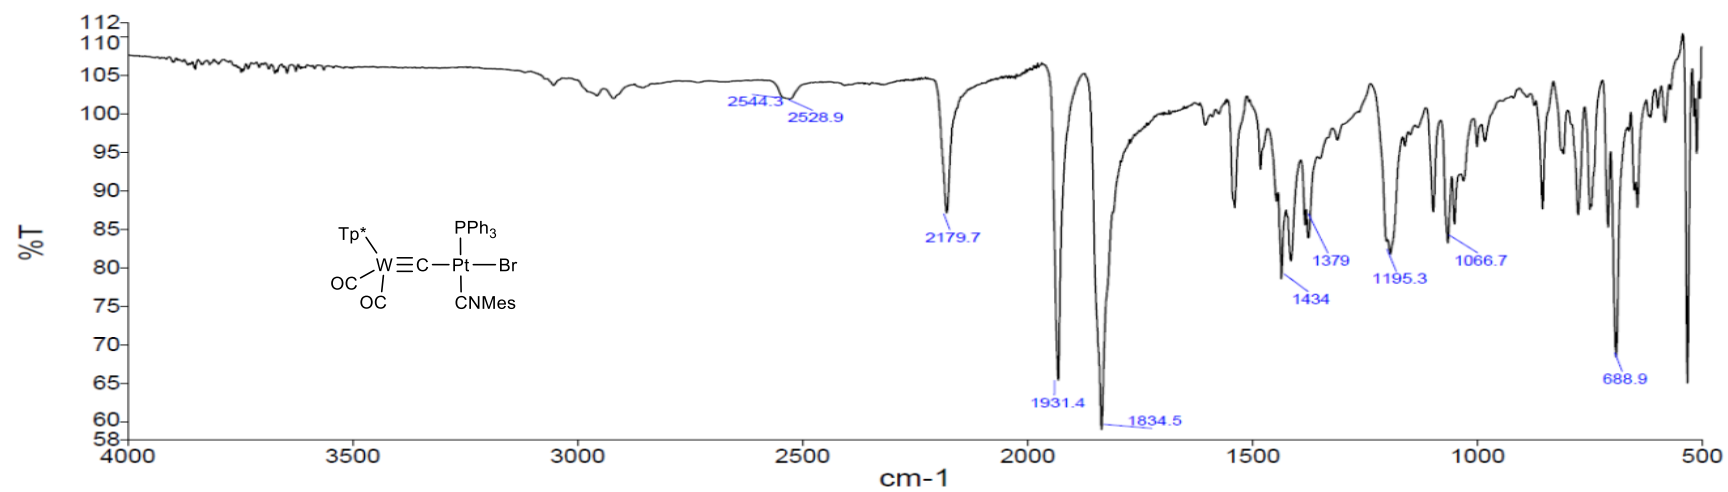

Figure S46: Infrared Spectrum of [WPt(μ<sub>2</sub>-C)Br(CNC<sub>6</sub>H<sub>2</sub>Me<sub>3</sub>-2,4,6)(CO)<sub>2</sub>(PPh<sub>3</sub>)(Tp\*)] (4b) (ATR, 25 °C, v)

## SUPPORTING INFORMATION

## Dalton Transactions

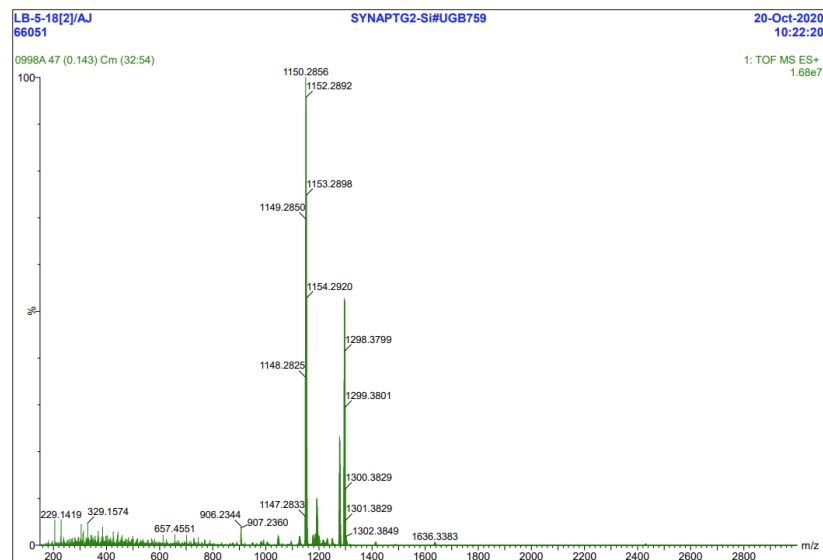

## Elemental Composition Report

## Single Mass Analysis

Tolerance = 5.0 PPM / DBE: min = -1.5, max = 30.0

Element prediction: Off

Number of isotope peaks used for i-FIT = 3

Monoisotopic Mass, Even Electron Ions

961 formula(e) evaluated with 1 results within limits (up to 50 closest results for each mass)

Elements Used:

C: 0-50 H: 0-50 11B: 1-1 N: 0-8 O: 0-2 P: 0-1 79Br: 0-1 81Br: 0-1 184W: 0-1 195Pt: 0-1

LB-5-18[2]-MeOH/AJ

21-Oct-2020

10:09:31

66051

0998b 52 (0.132) Cm (45:52)

SYNAPT G2-SI#UGB759

1: TOF MS ES+

4.75e+005

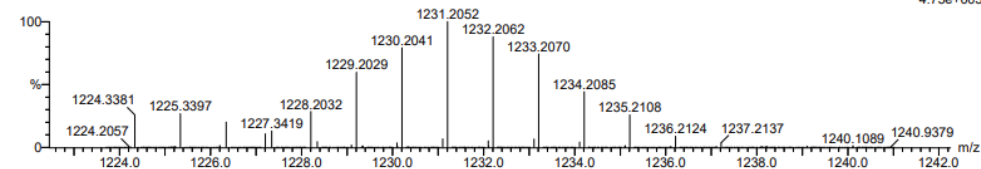

Minimum: -1.5  
Maximum: 5.0 5.0 30.0

| Mass      | Calc. Mass | mDa | PPM | DBE  | i-FIT  | Norm | Conf (%) | Formula                             |
|-----------|------------|-----|-----|------|--------|------|----------|-------------------------------------|
| 1232.2062 | 1232.2020  | 4.2 | 3.4 | 29.5 | 1059.6 | n/a  | n/a      | C46 H48 11B N7 O2 P 81Br 184W 195Pt |

Figure S47: Mass Spectrum of  $[\text{WPt}(\mu_2\text{-C})\text{Br}(\text{CNC}_6\text{H}_2\text{Me}_3\text{-2,4,6})(\text{CO})_2(\text{PPh}_3)(\text{Tp}^*)]$  (**4b**)



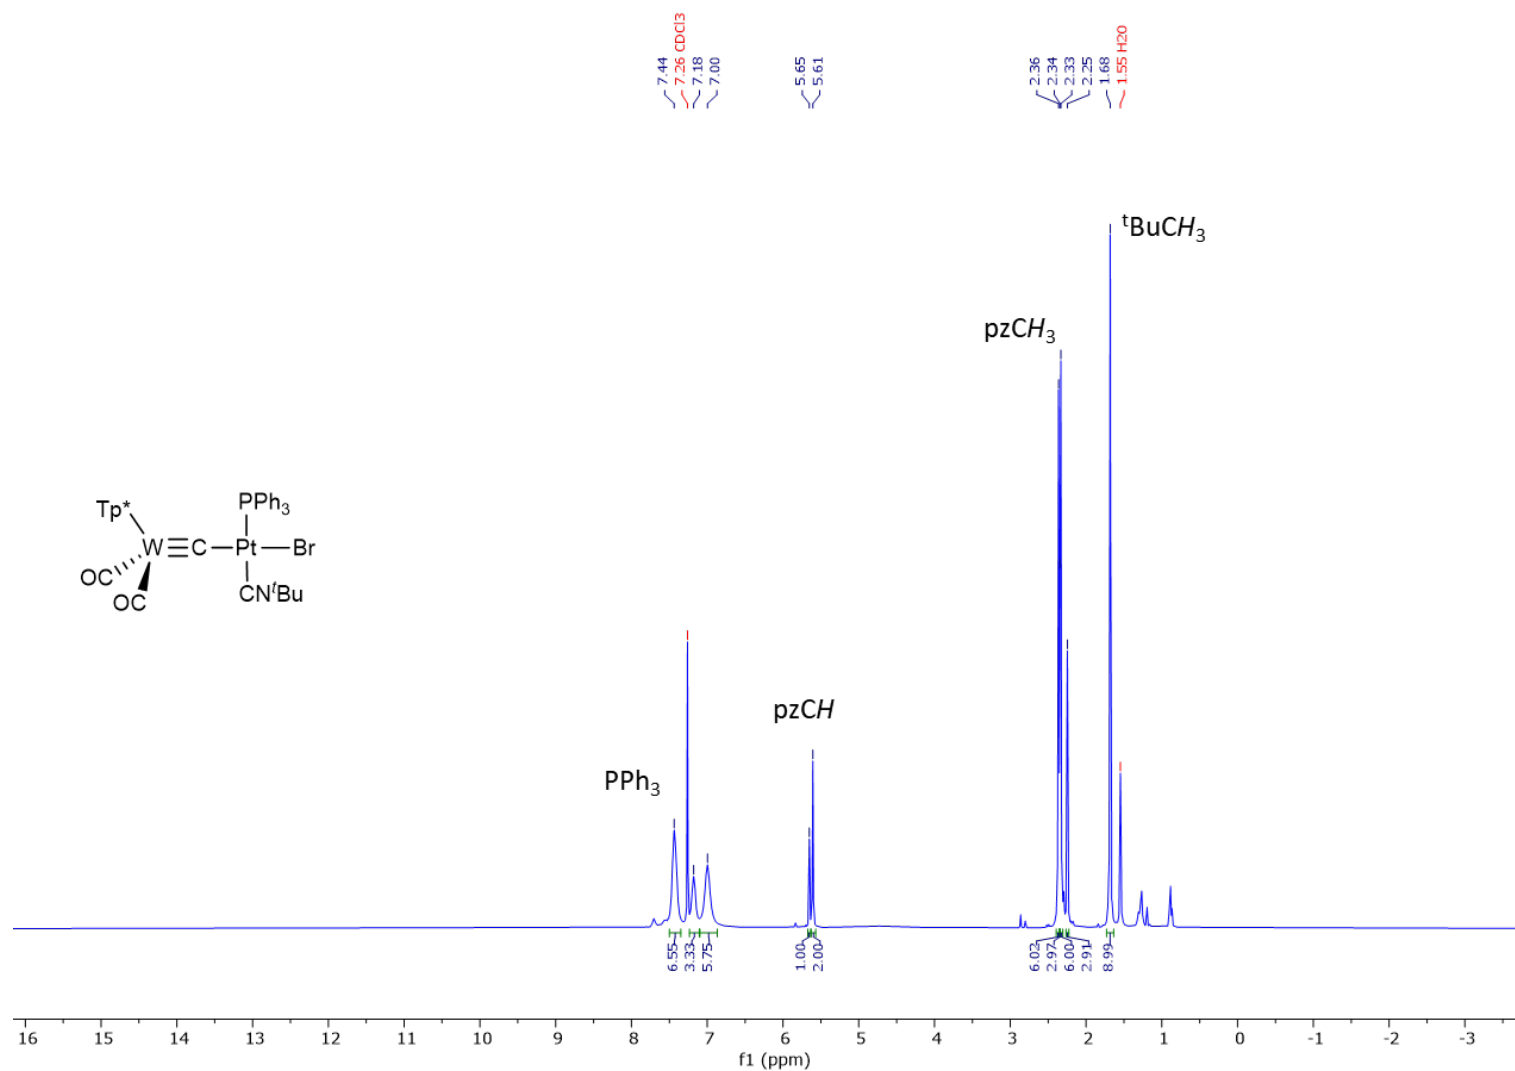

**Figure S48:**  $^1\text{H}$  NMR Spectrum of  $[\text{WPt}(\mu_2\text{-C})\text{Br}(\text{CN}^t\text{Bu})(\text{CO})_2(\text{PPh}_3)(\text{Tp}^*)]$  (**4c**) (400 MHz,  $\text{CDCl}_3$ , 25 °C,  $\delta$ )

## SUPPORTING INFORMATION

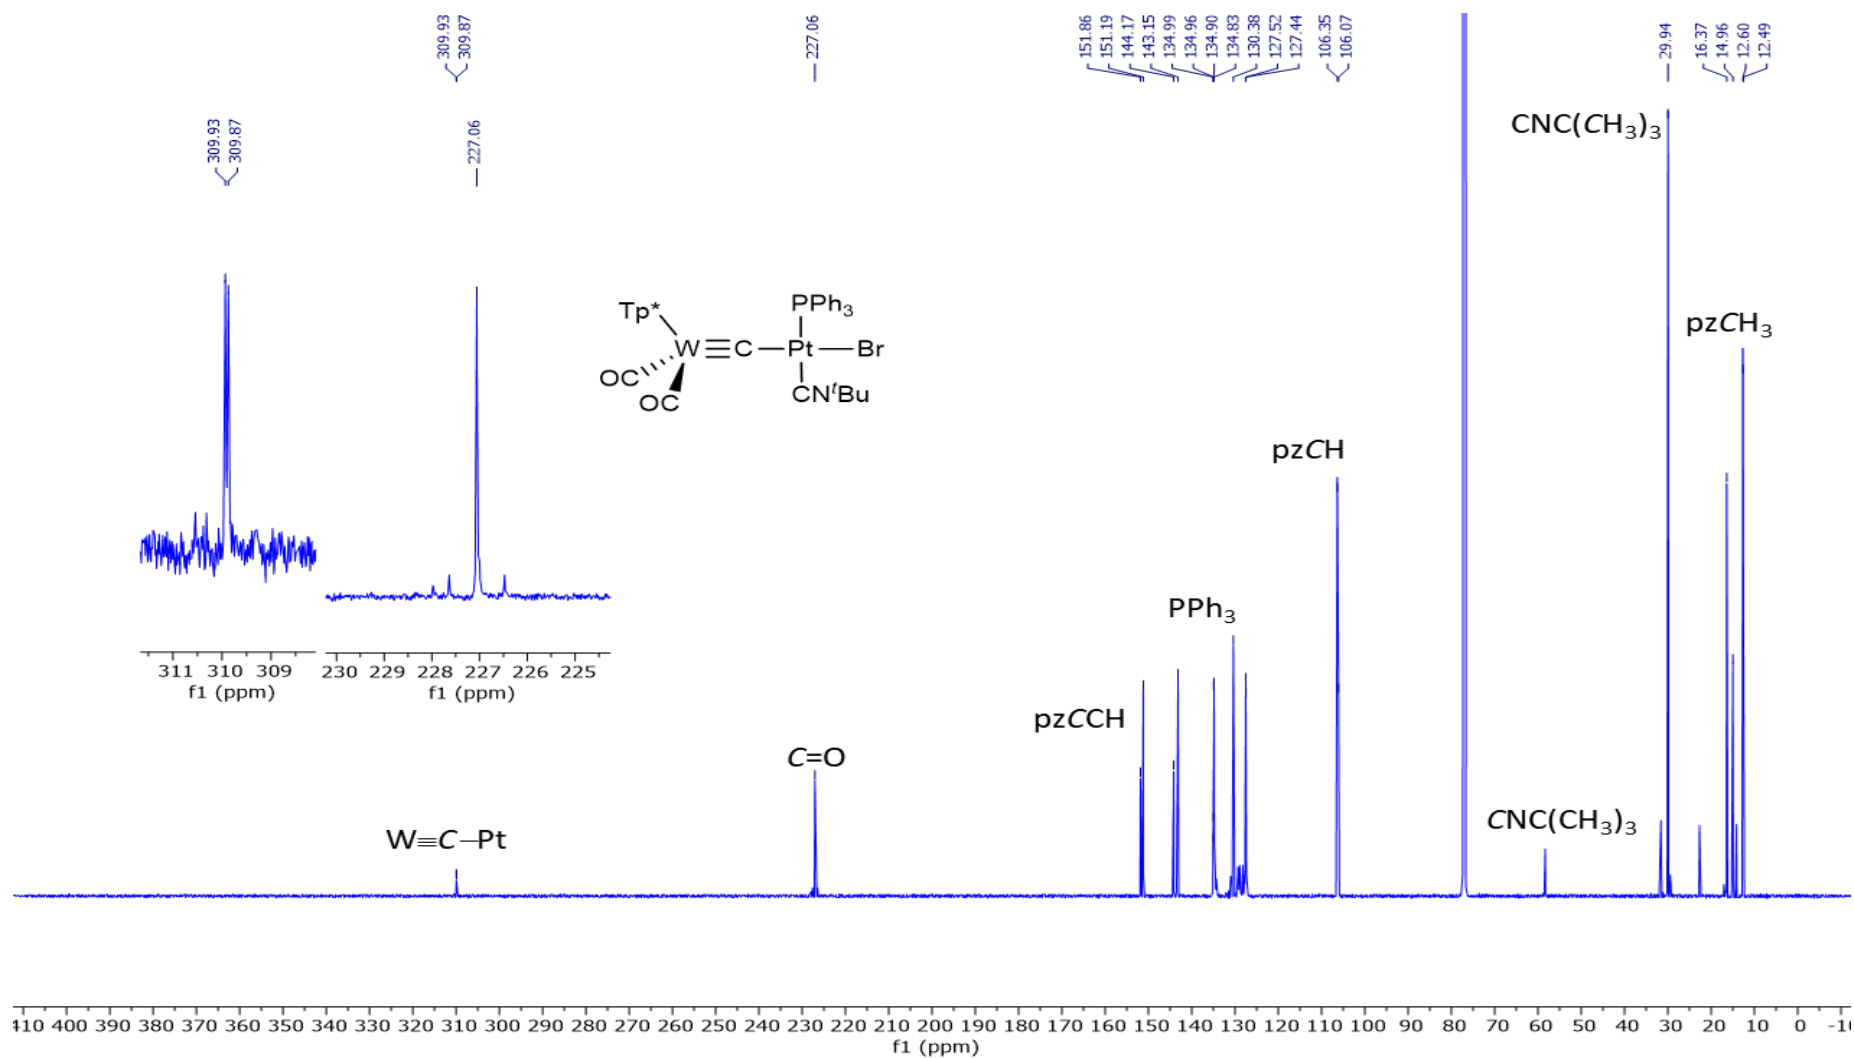

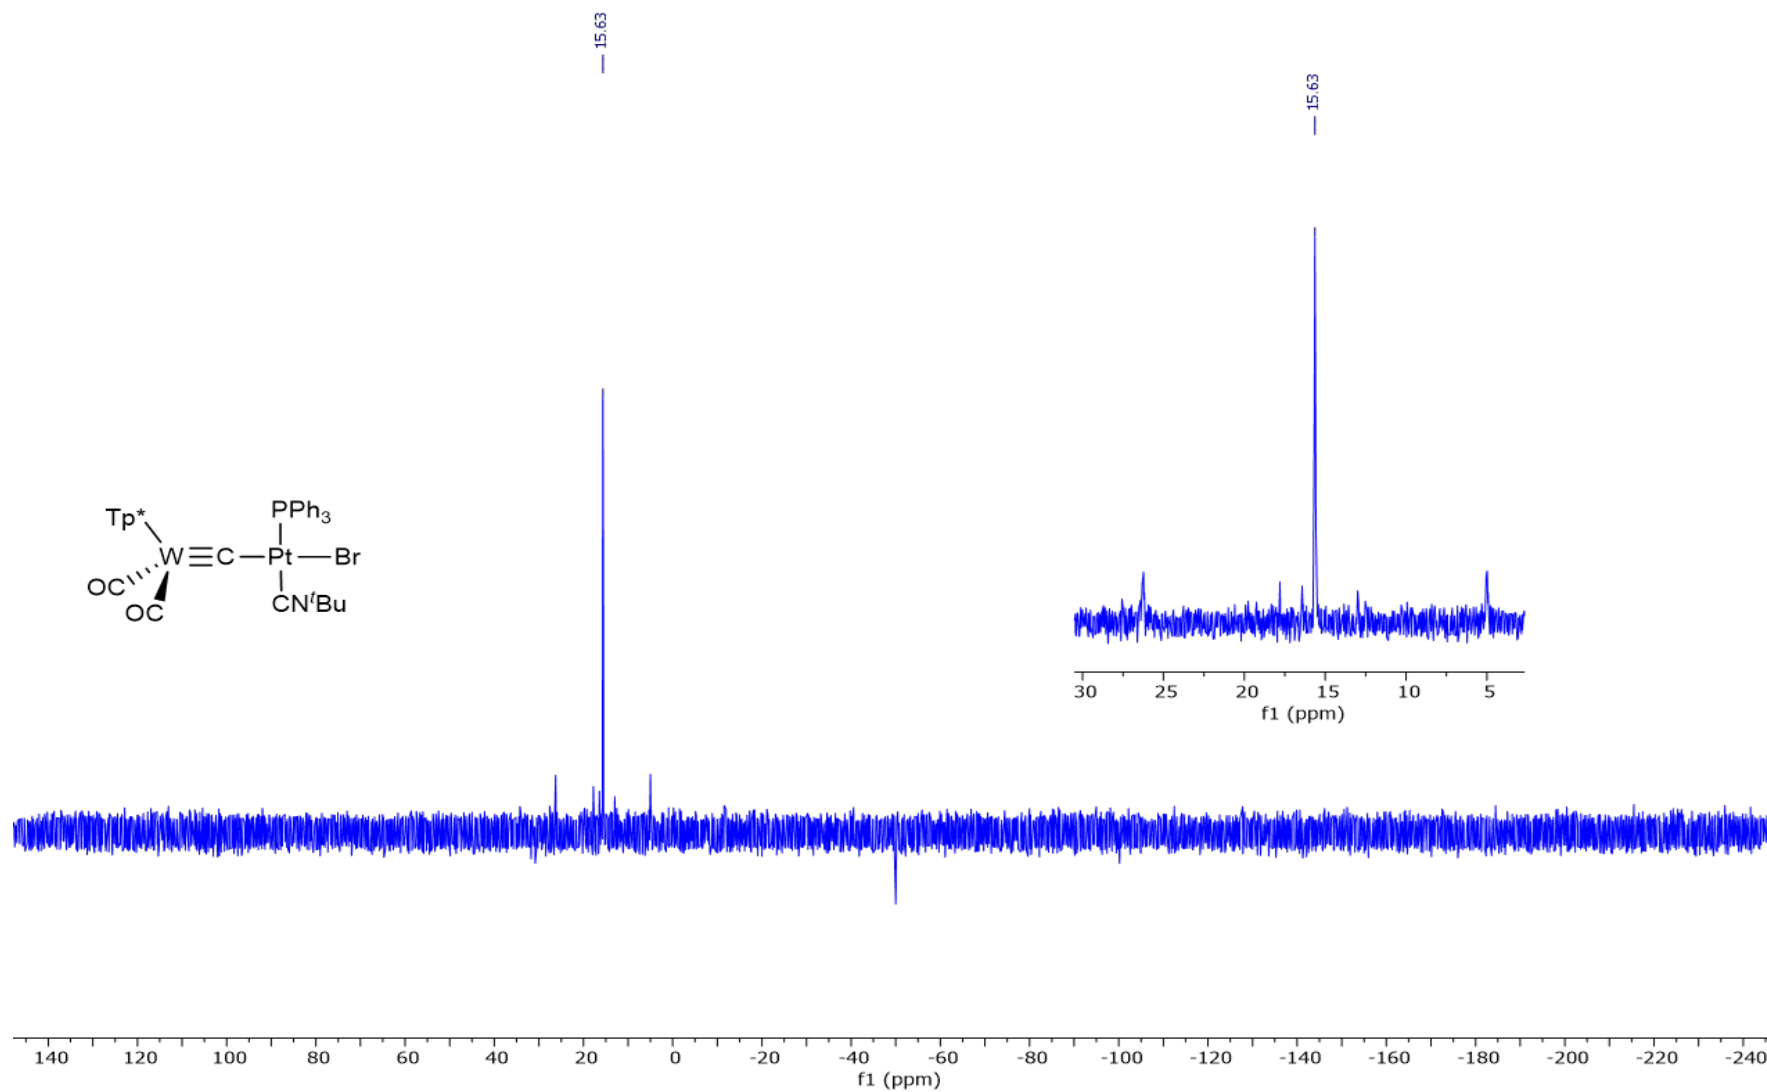

Figure S50:  $^{31}\text{P}\{^1\text{H}\}$  NMR Spectrum of  $[\text{WPt}(\mu\text{-C})\text{Br}(\text{CN}^t\text{Bu})(\text{CO})_2(\text{PPh}_3)(\text{Tp}^*)]$  (**4c**) (162 MHz,  $\text{CDCl}_3$ , 25 °C,  $\delta$ )

## SUPPORTING INFORMATION

## Dalton Transactions

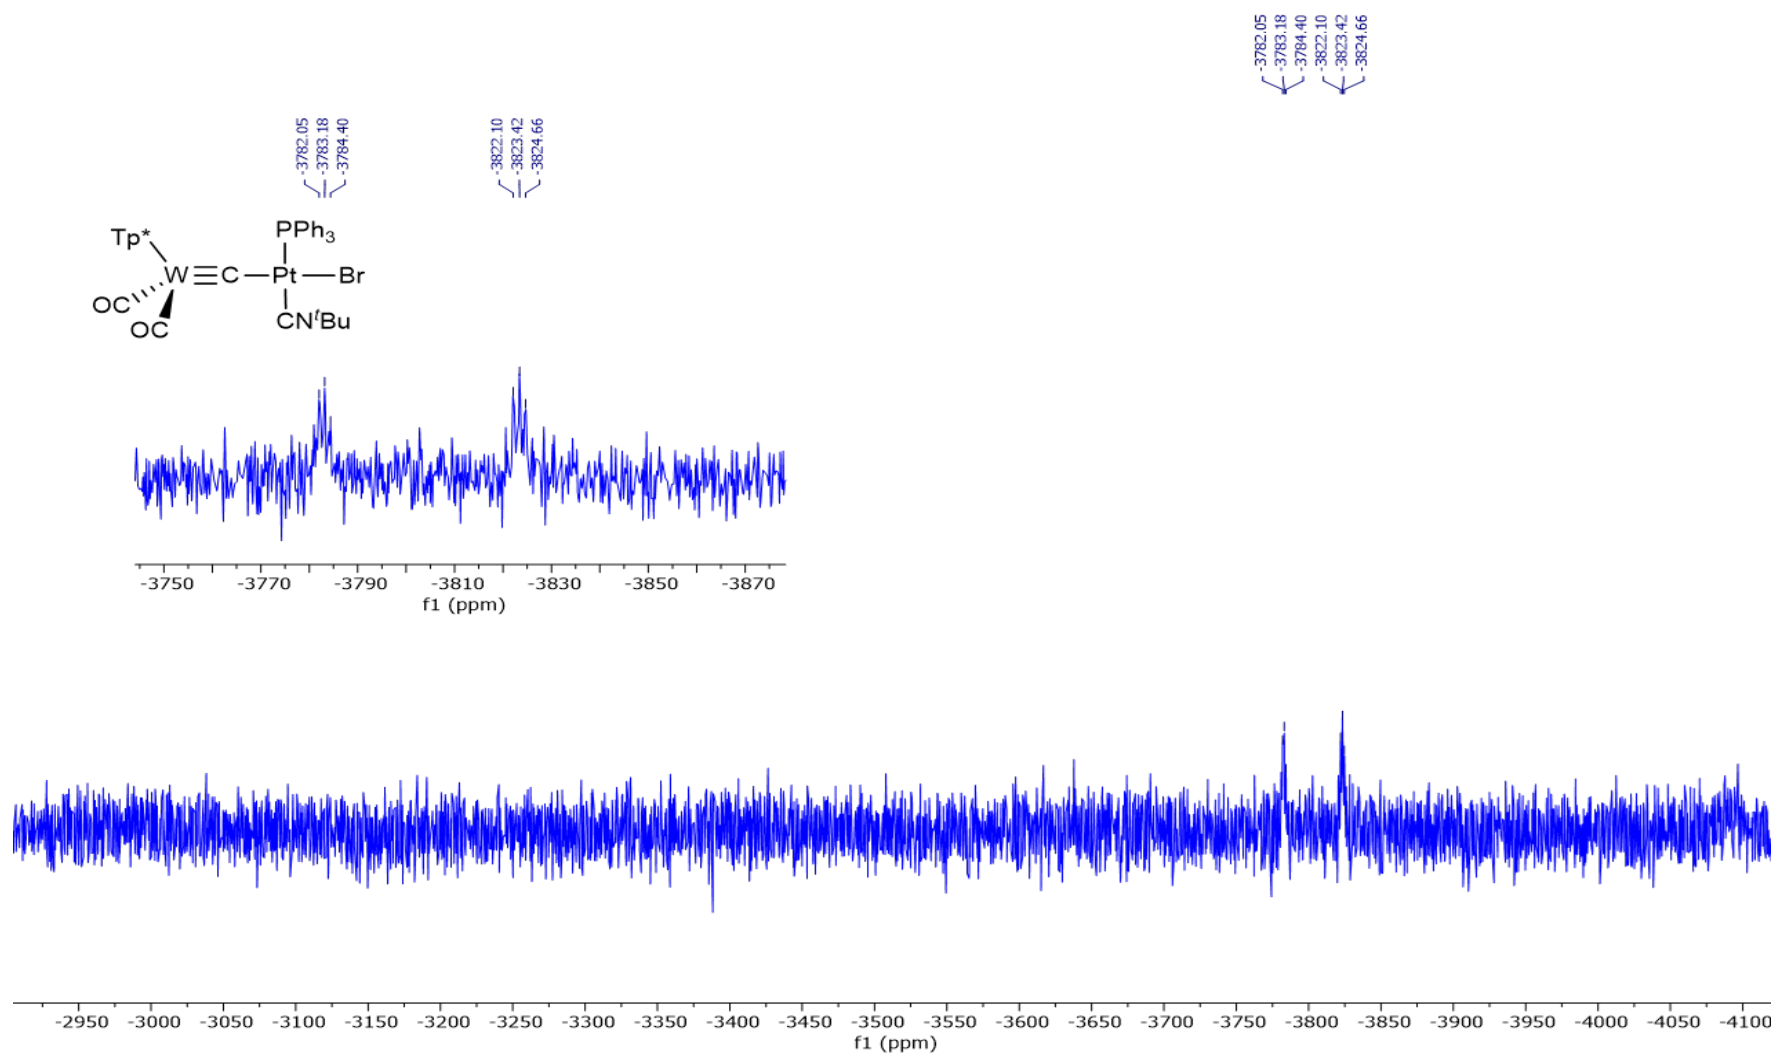

**Figure S51:**  $^{195}\text{Pt}\{\text{^1H}\}$  NMR Spectrum of  $[\text{WPt}(\mu\text{-C})\text{Br}(\text{CN}'\text{Bu})(\text{CO})_2(\text{PPh}_3)(\text{Tp}^*)]$  (**4c**) (86 MHz,  $\text{CDCl}_3$ , 25 °C,  $\delta$ )

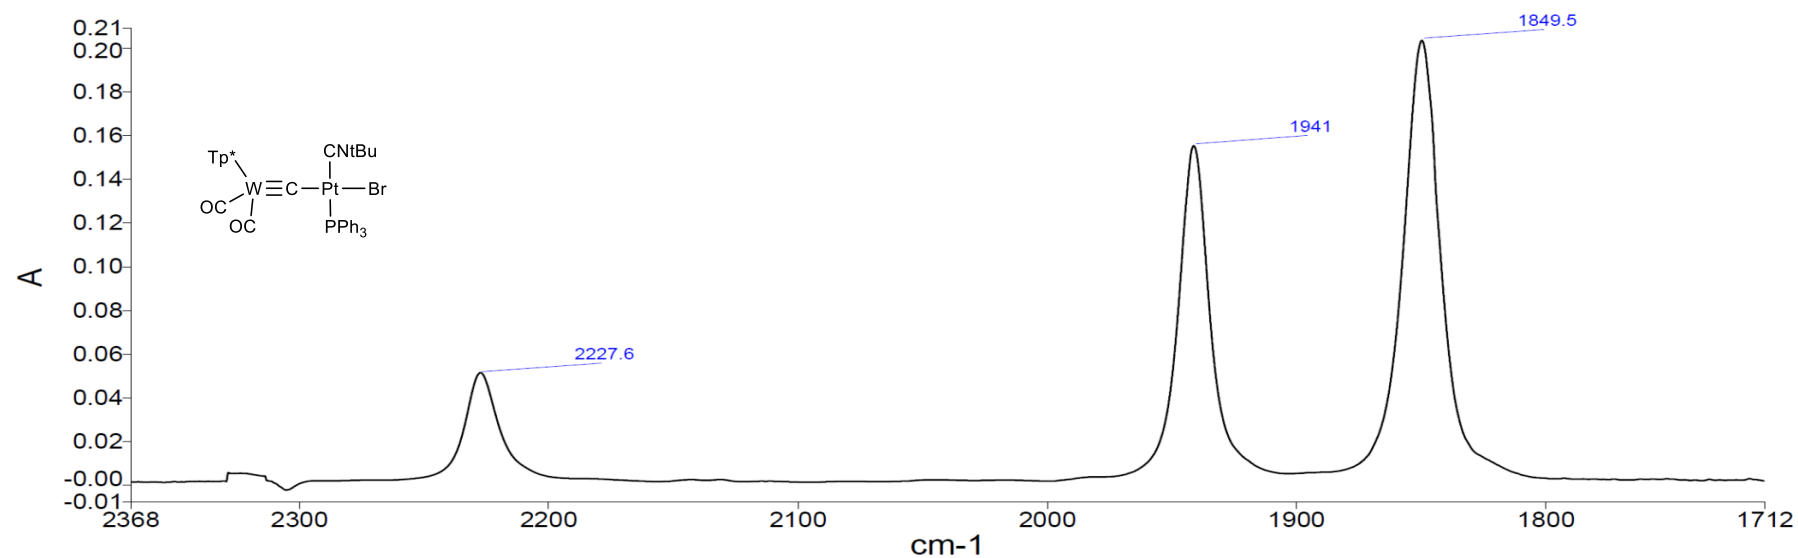

Figure S52: Infrared Spectrum of [WPt(μ<sub>2</sub>-C)Br(CN<sup>t</sup>Bu)(CO)<sub>2</sub>(PPh<sub>3</sub>)(Tp\*)] (4c) (CH<sub>2</sub>Cl<sub>2</sub>, 25 °C, v)

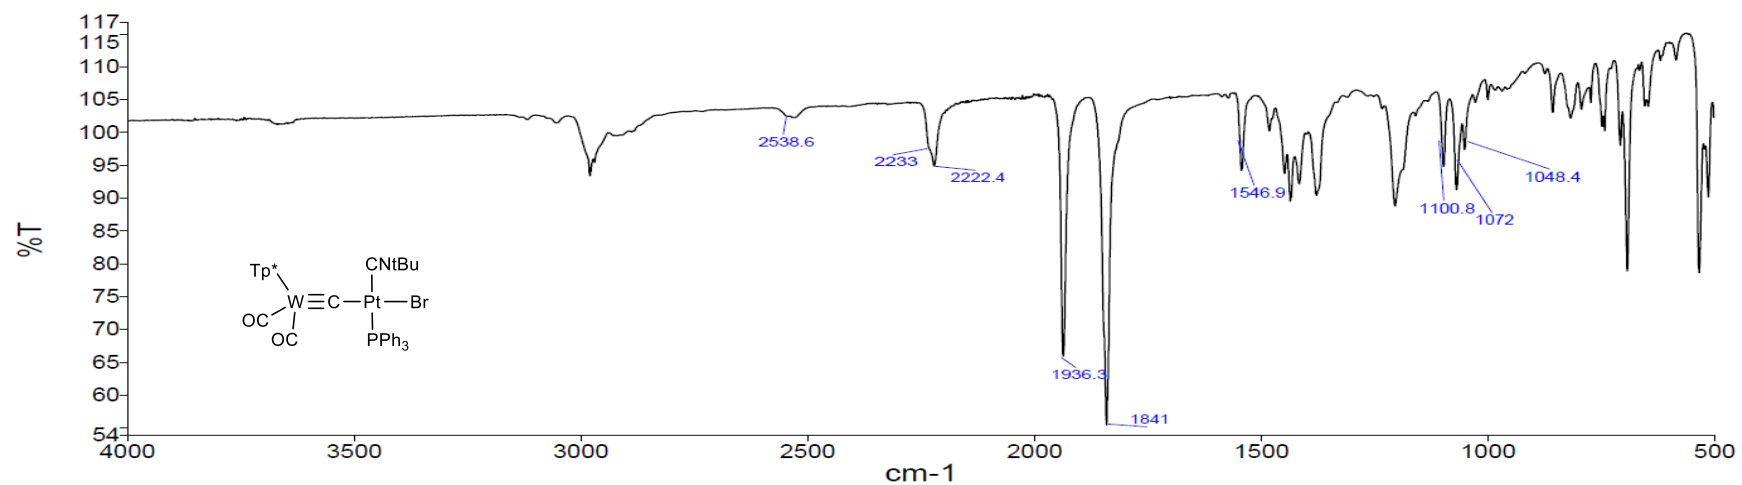

Figure S53: Infrared Spectrum of [WPt(μ<sub>2</sub>-C)Br(CN<sup>t</sup>Bu)(CO)<sub>2</sub>(PPh<sub>3</sub>)(Tp\*)] (4c) (ATR, 25 °C, v)

## SUPPORTING INFORMATION

## Dalton Transactions

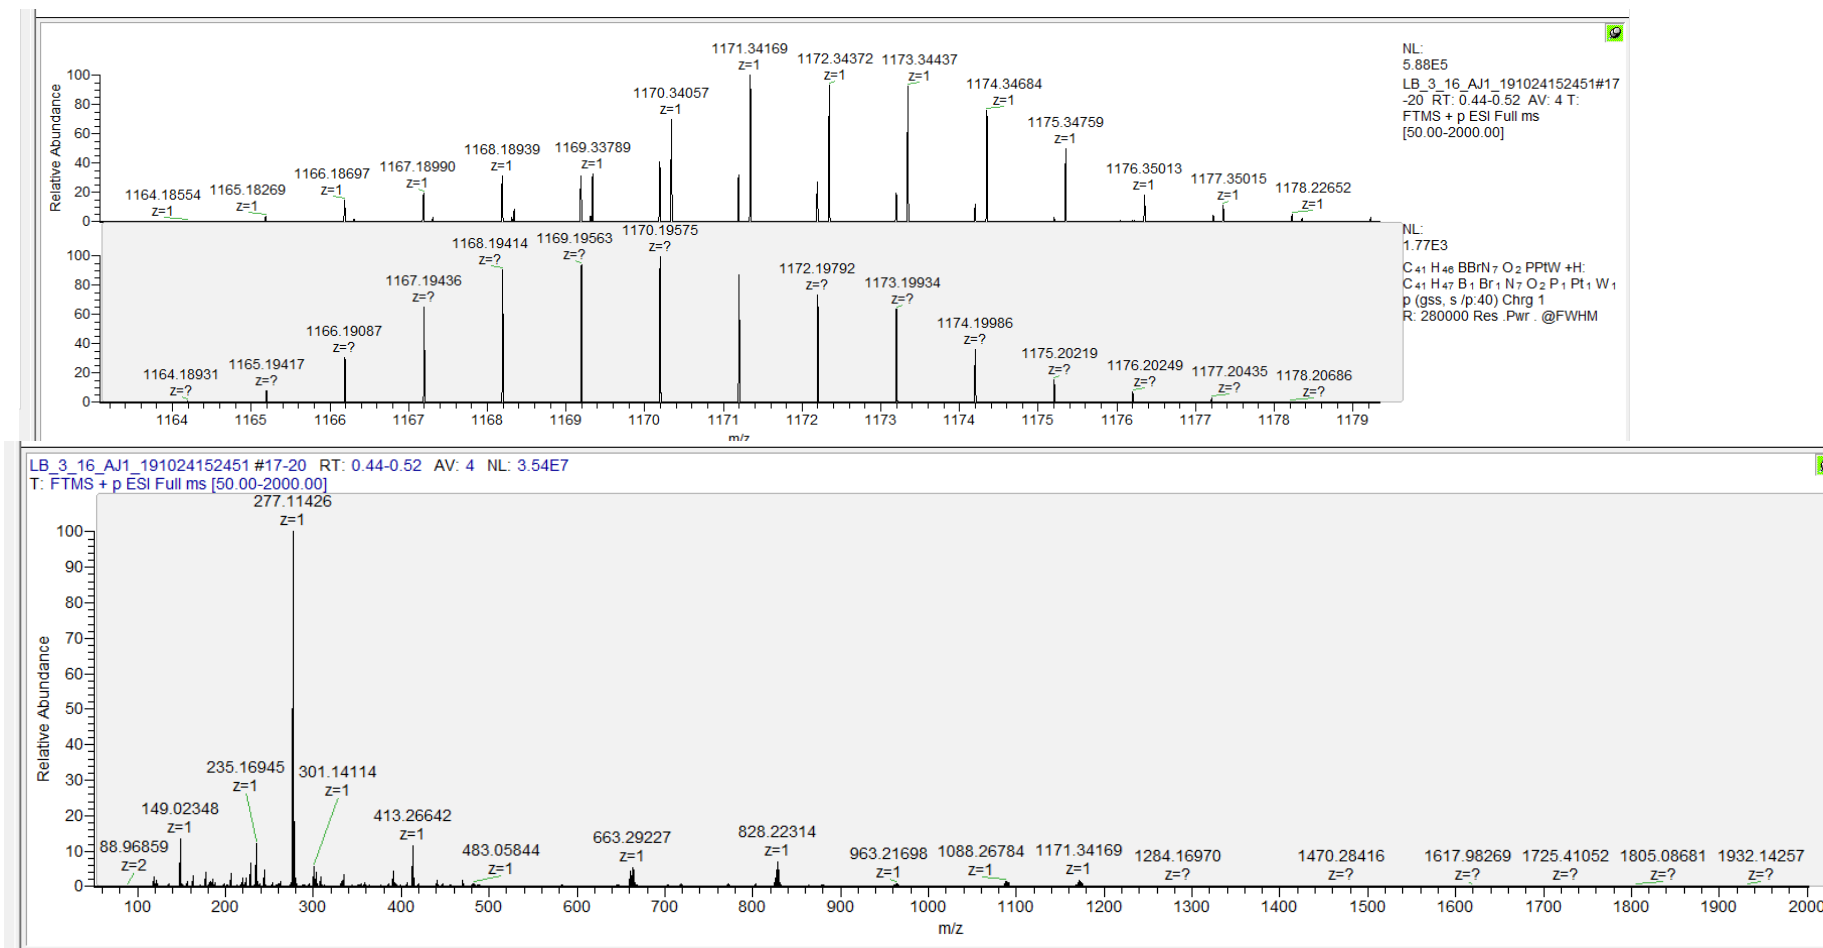Figure S54: Mass Spectrum of  $[\text{Wpt}(\mu_2\text{-C})\text{Br}(\text{CN}^i\text{Bu})(\text{CO})_2(\text{PPh}_3)(\text{Tp}^*)] (\mathbf{4c})$

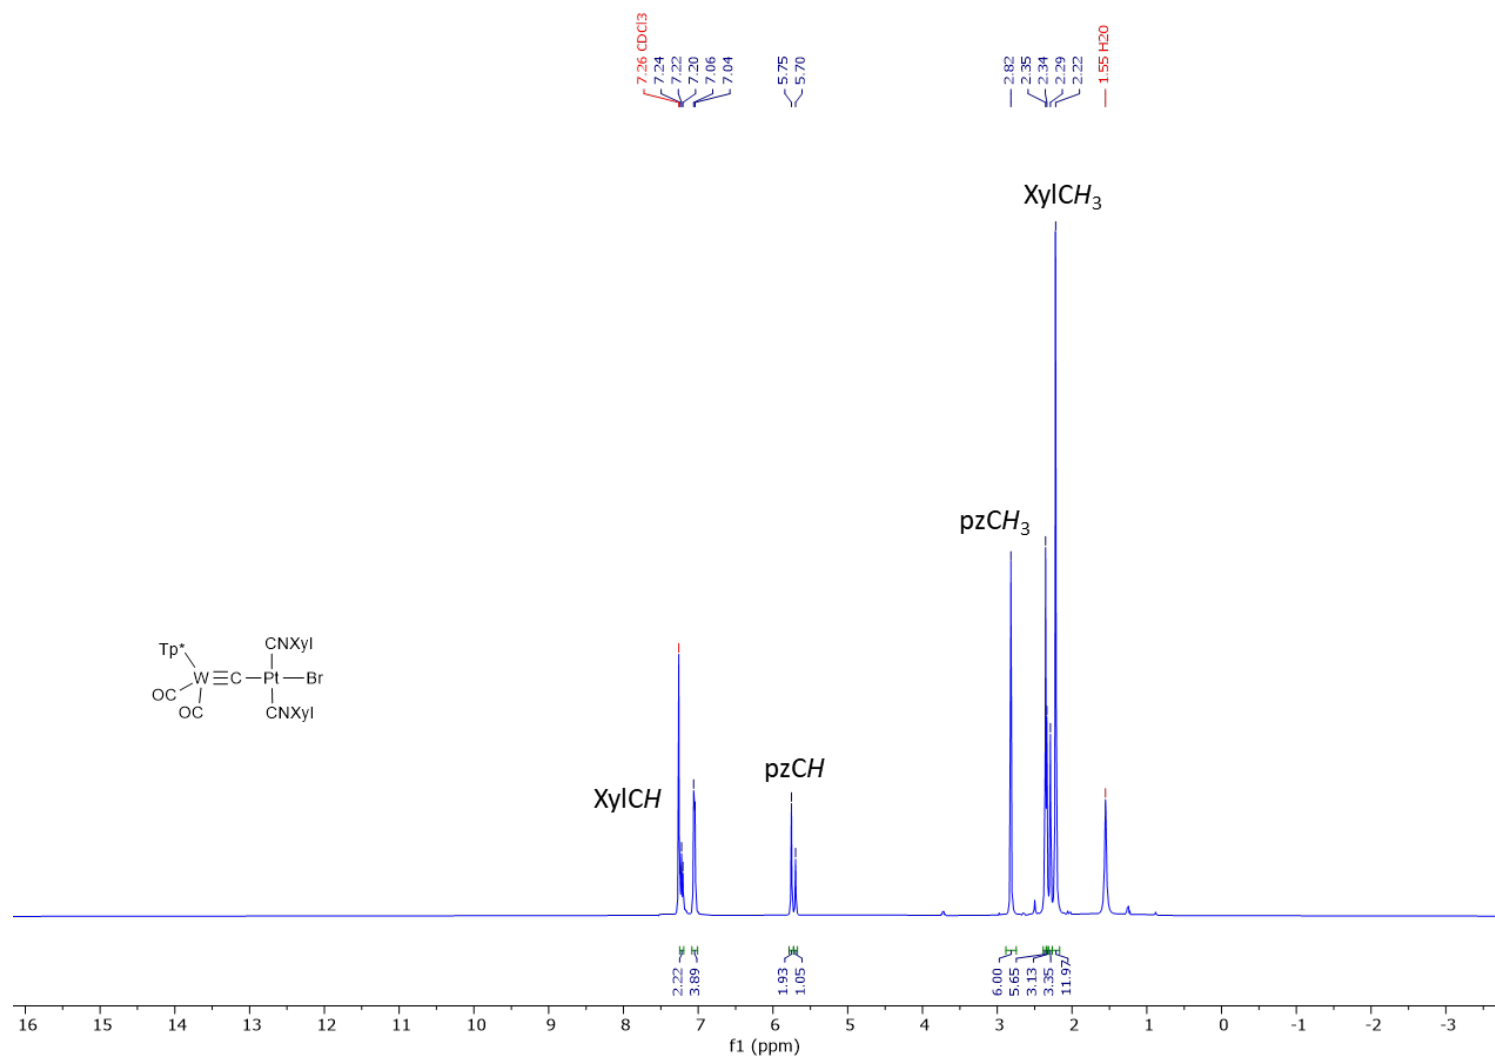

Figure S55:  $^1\text{H}$  NMR Spectrum of  $[\text{WPt}(\mu_2\text{-C})\text{Br}(\text{CNC}_6\text{H}_3\text{Me}_2\text{-2,6})(\text{CO})_2(\text{Tp}^*)]$  (**5a**) (400 MHz,  $\text{CDCl}_3$ , 25  $^\circ\text{C}$ ,  $\delta$ )

## SUPPORTING INFORMATION

## Dalton Transactions

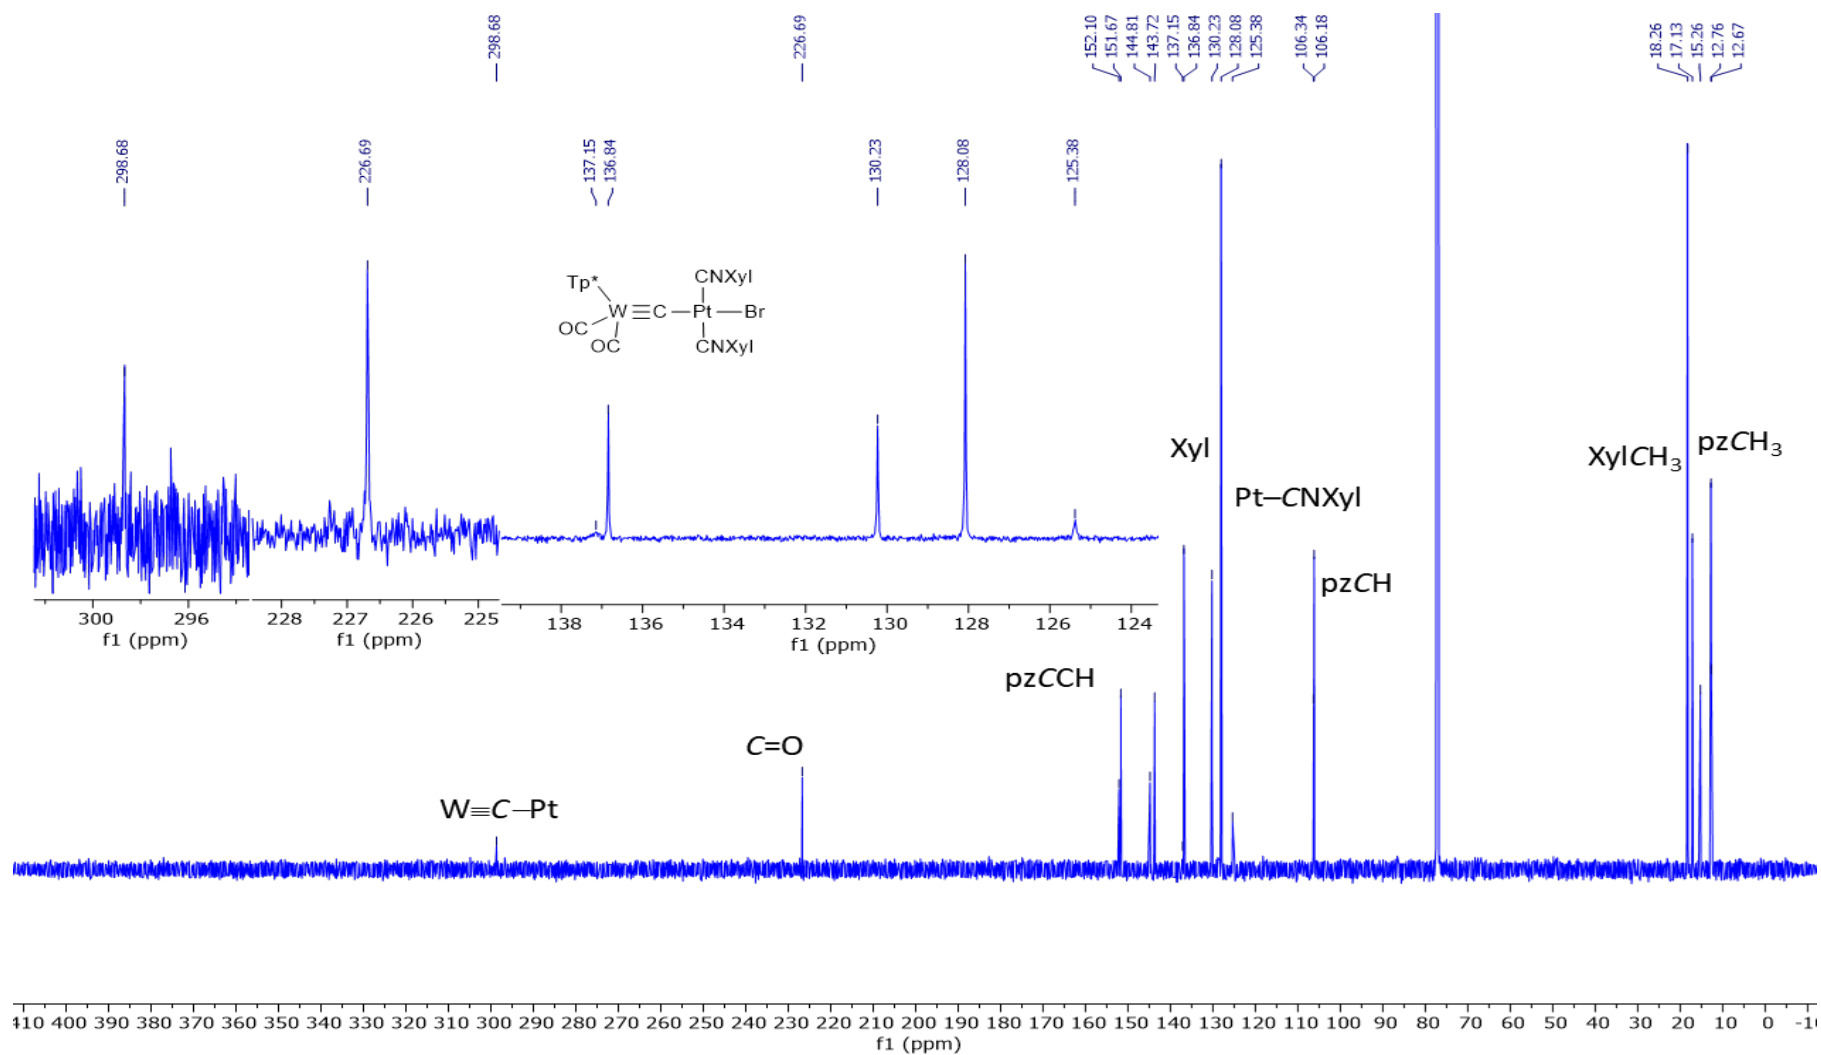

Figure S56:  $^{13}\text{C}\{^1\text{H}\}$  NMR Spectrum of  $[\text{WPt}(\mu_2\text{-C})\text{Br}(\text{CNC}_6\text{H}_3\text{Me}_2\text{-2,6})_2(\text{CO})_2(\text{Tp}^*)]$  (5a) (151 MHz,  $\text{CDCl}_3$ , 25 °C,  $\delta$ )



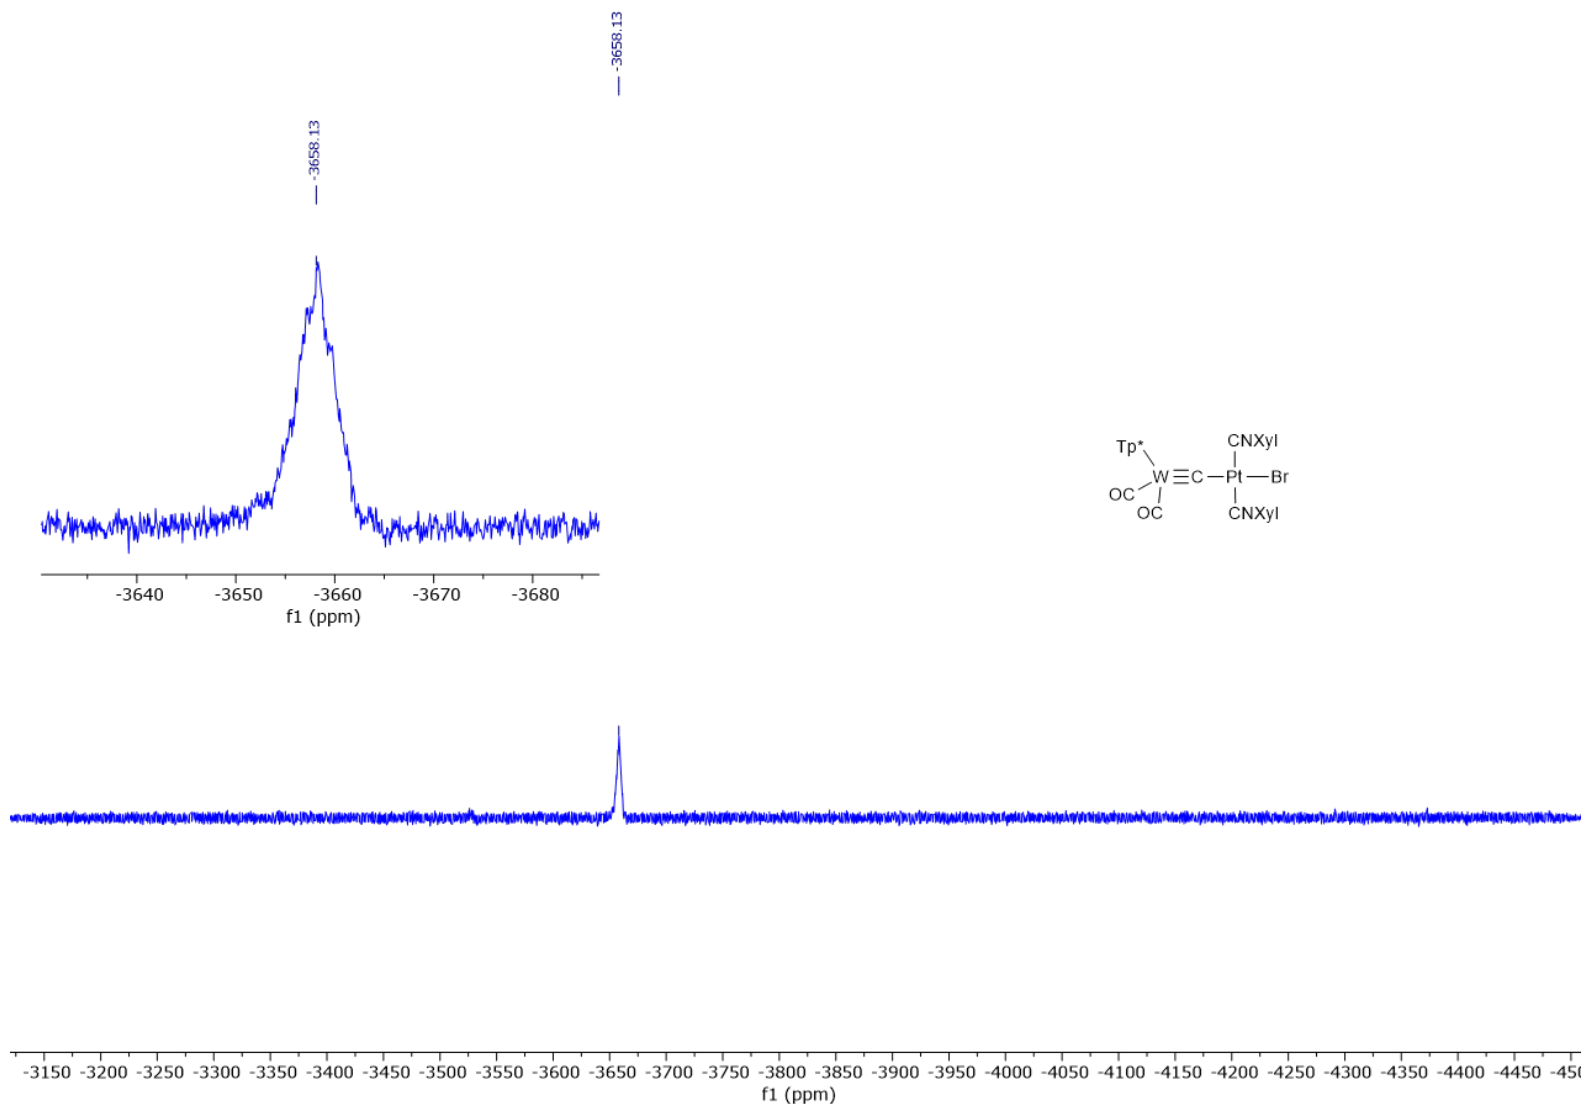

**Figure S57:**  $^{195}\text{Pt}\{^1\text{H}\}$  NMR Spectrum of  $[\text{WPt}(\mu_2\text{-C})\text{Br}(\text{CNC}_6\text{H}_3\text{Me}_2\text{-2,6})_2(\text{CO})_2(\text{Tp}^*)]$  (**5a**) (86 MHz,  $\text{CDCl}_3$ , 25 °C,  $\delta$ )

## SUPPORTING INFORMATION

Dalton Transactions

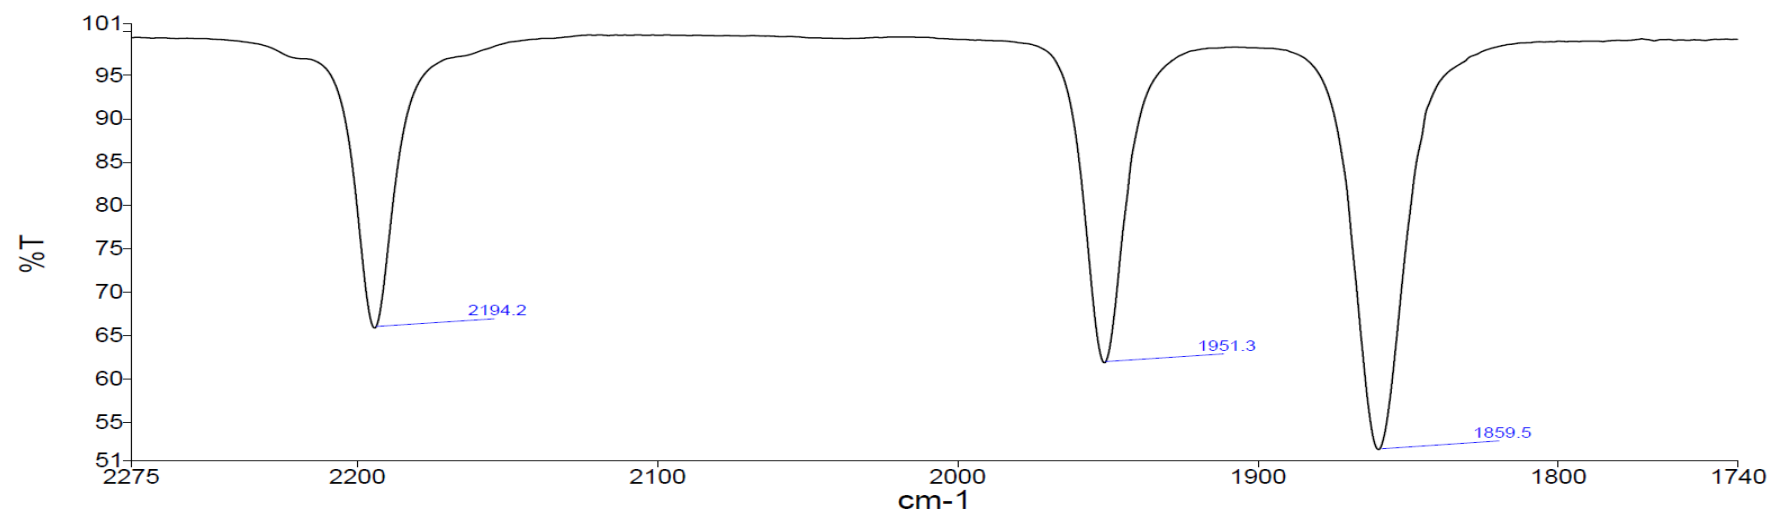

Figure S58: Infrared Spectrum of  $[\text{WPt}(\mu_2\text{-C})\text{Br}(\text{CNC}_6\text{H}_3\text{Me}_2\text{-2,6})_2(\text{CO})_2(\text{Tp}^*)]$  (**5a**) ( $\text{CH}_2\text{Cl}_2$ , 25 °C, v)

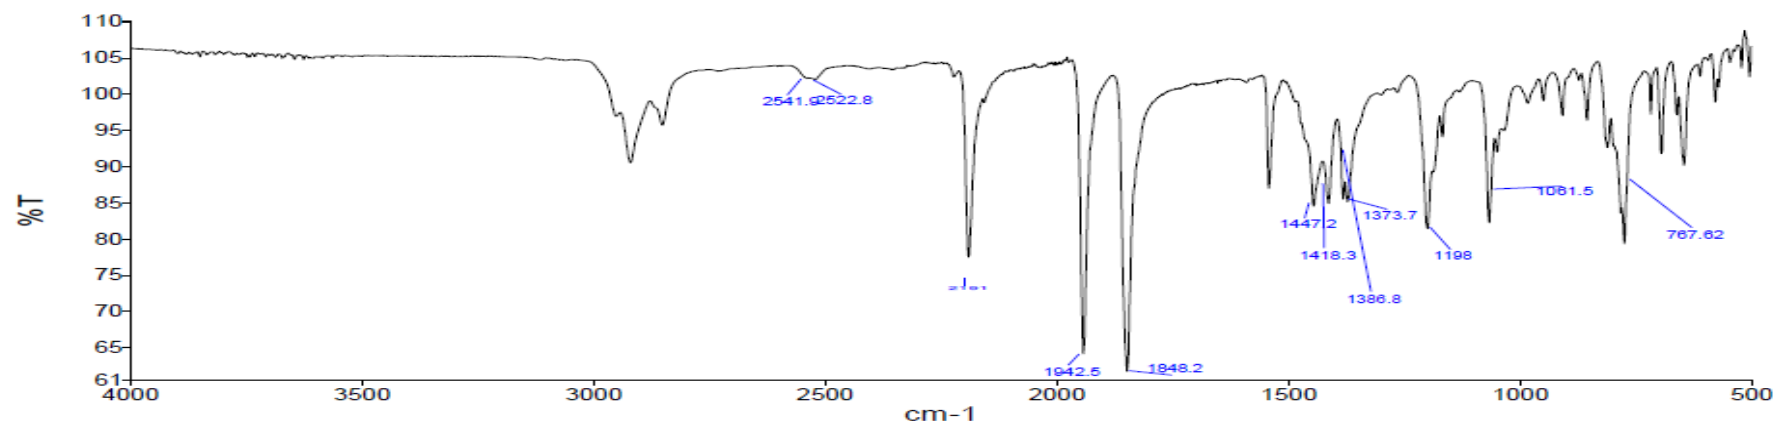

Figure S59: Infrared Spectrum of  $[\text{WPt}(\mu_2\text{-C})\text{Br}(\text{CNC}_6\text{H}_3\text{Me}_2\text{-2,6})_2(\text{CO})_2(\text{Tp}^*)]$  (**5a**) (ATR, 25 °C, v)

## Elemental Composition Report

Page 1

## Single Mass Analysis

Tolerance = 3.0 PPM / DBE: min = -1.5, max = 25.0  
 Element prediction: Off  
 Number of isotope peaks used for i-FIT = 3

## Monoisotopic Mass, Even Electron Ions

722 formula(e) evaluated with 1 results within limits (up to 50 best isotopic matches for each mass)

## Elements Used:

C: 0-50 H: 0-50 11B: 1-1 N: 0-8 O: 0-2 79Br: 0-1 81Br: 0-1 184W: 0-1 195Pt: 0-1

LB-5-87/AJ  
 66374  
 0128 61 (0.138) Cm (39:120)

SYNAPT G2-Si#NotSet

11-Feb-2021  
 15:24:35  
 1: TOF MS ES+  
 1.53e+006

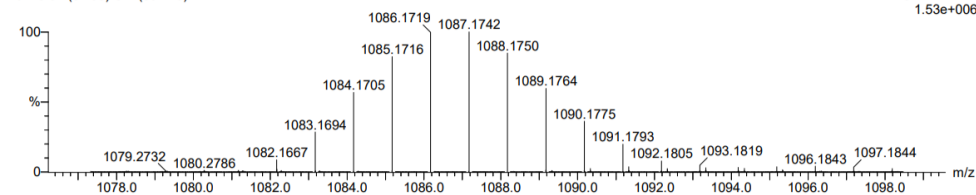

Minimum: 5.0 3.0 -1.5  
 Maximum: 1085.1716 1085.1708 0.8 0.7 23.5 2975.4 n/a n/a

| Mass      | Calc. Mass | mDa | PPM | DBE  | i-FIT  | Norm | Conf (%) | Formula                           |
|-----------|------------|-----|-----|------|--------|------|----------|-----------------------------------|
| 1085.1716 | 1085.1708  | 0.8 | 0.7 | 23.5 | 2975.4 | n/a  | n/a      | C36 H40 11B N8 O2 79Br 184W 195Pt |

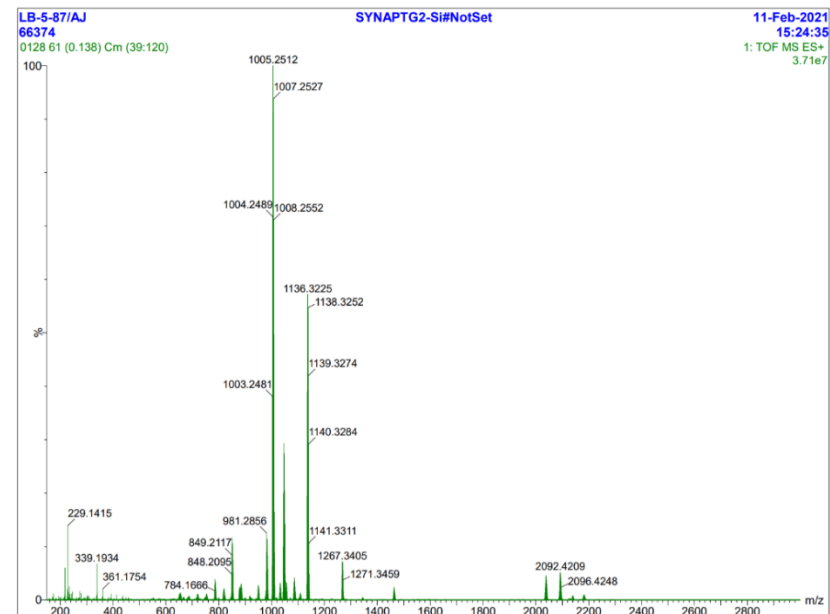

Figure S60: Mass Spectrum of  $[\text{WPt}(\mu_2\text{-C})\text{Br}(\text{CNC}_6\text{H}_3\text{Me}_2\text{-2,6})(\text{CO})_2(\text{Tp}^*)]$  (**5a**)

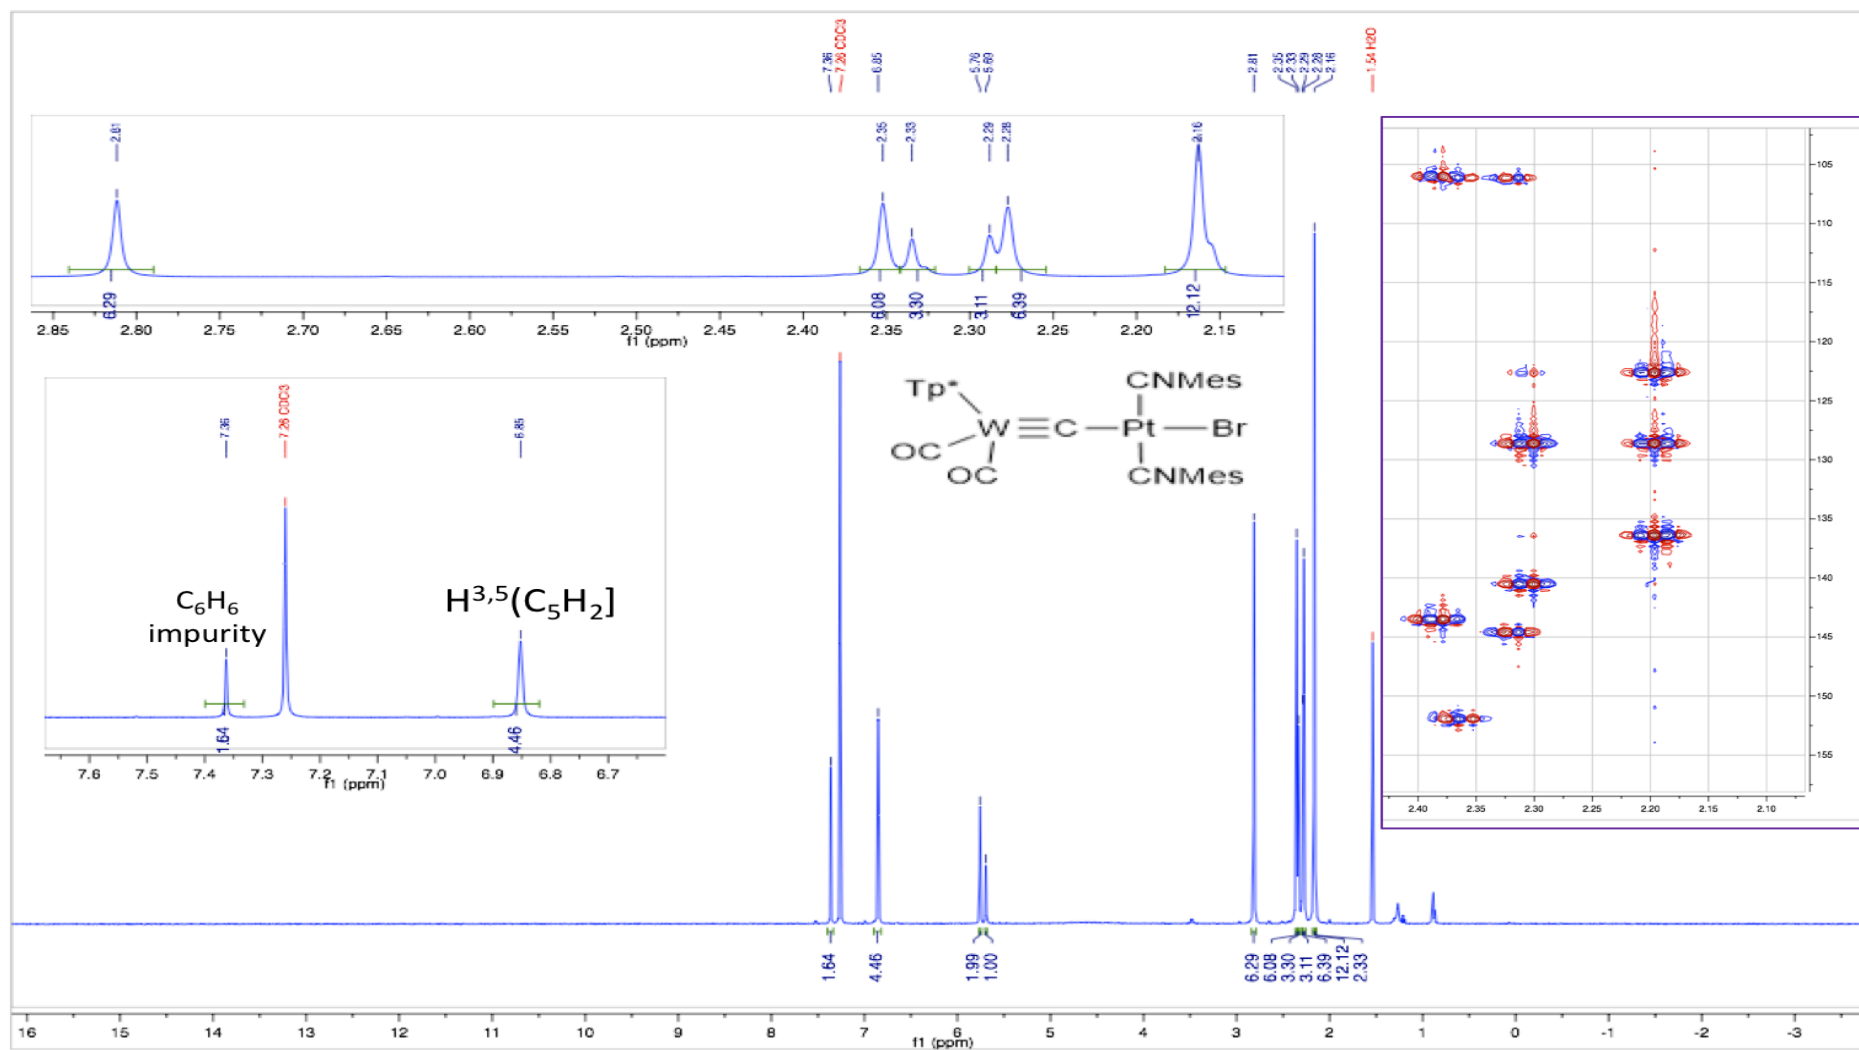

**Figure S61:**  $^1\text{H}$  NMR Spectrum of  $[\text{WPt}(\mu_2\text{-C})(\text{CNC}_6\text{H}_2\text{Me}_3\text{-2,4,6})_2(\text{CO})_2(\text{Tp}^*)]$  (**5b**) (400 MHz,  $\text{CDCl}_3$ ,  $25^\circ\text{C}$ ,  $\delta$ ) – Inset =  $^1\text{H}$ - $^{13}\text{C}$  HMBC spectrum indicating correlation between the 12 proton  $^1\text{H}$  resonance ( $\delta_{\text{H}} = 2.20$ ) and three  $^{13}\text{C}$  resonances ( $\delta_{\text{C}} = 122.6$ , 126.6 and 136.4).

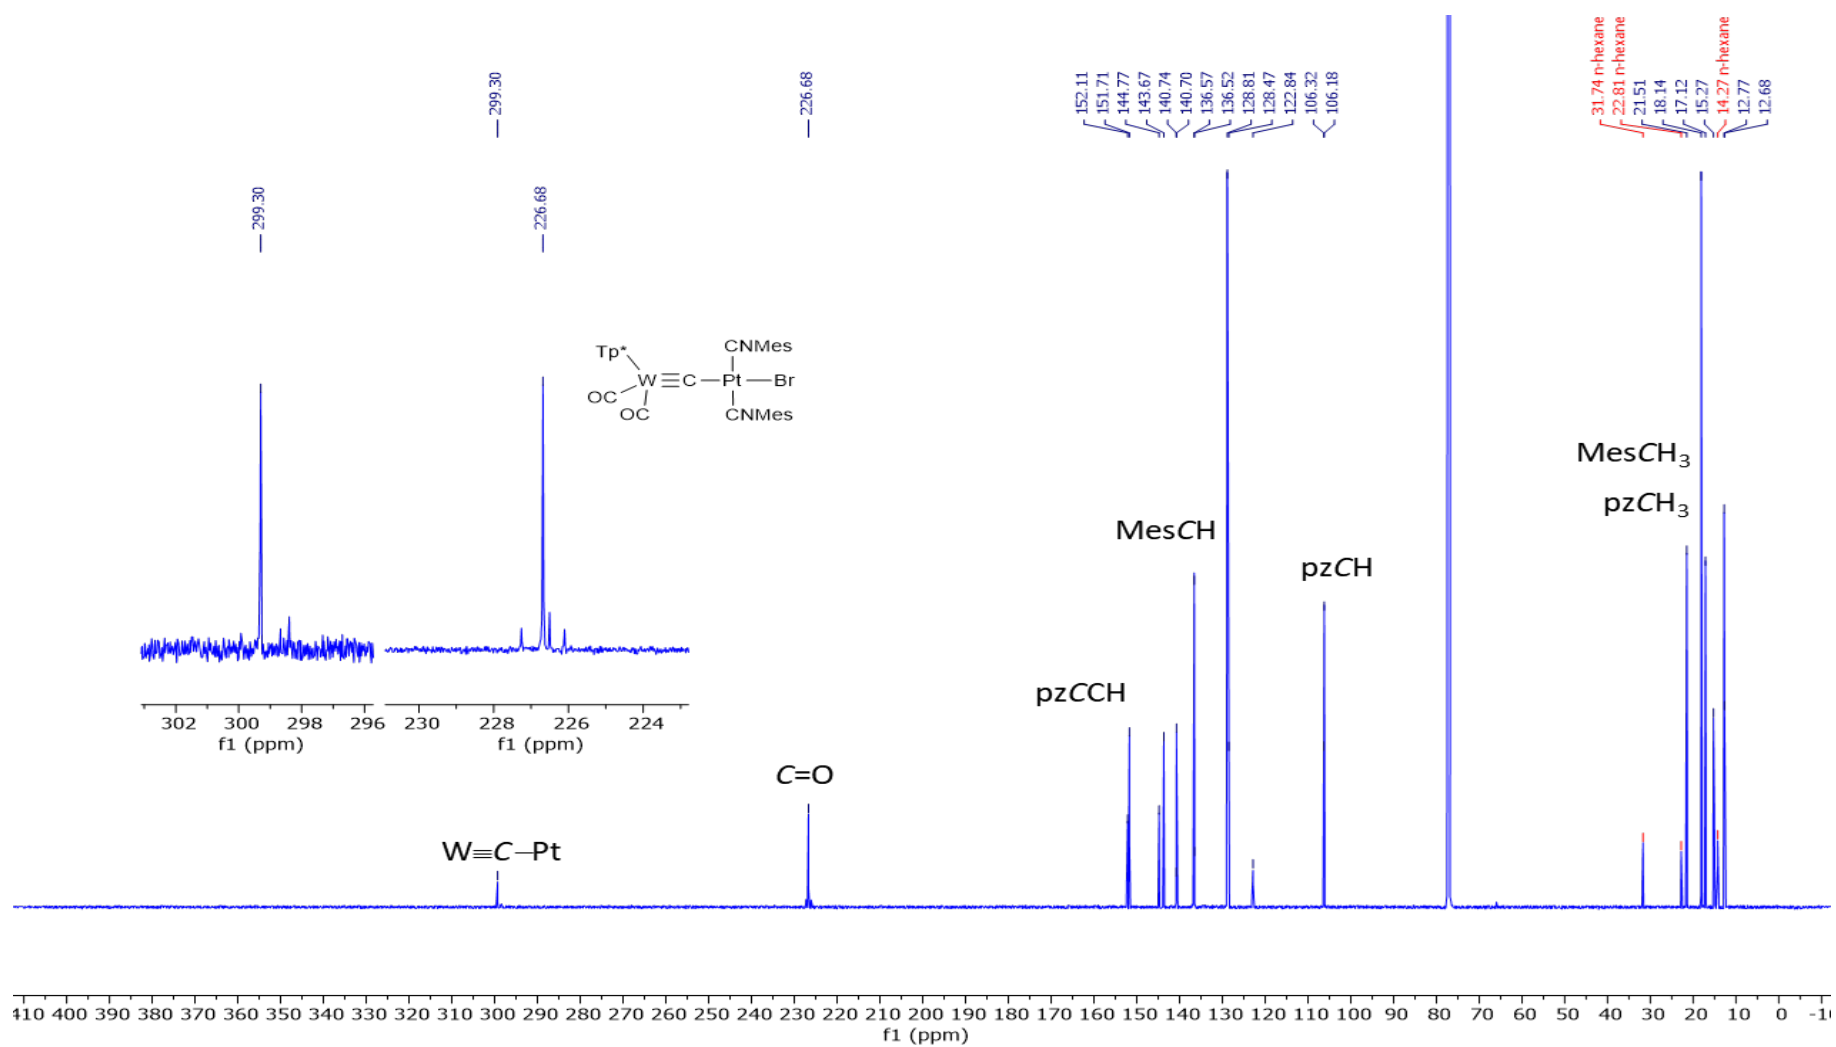

## SUPPORTING INFORMATION

## Dalton Transactions

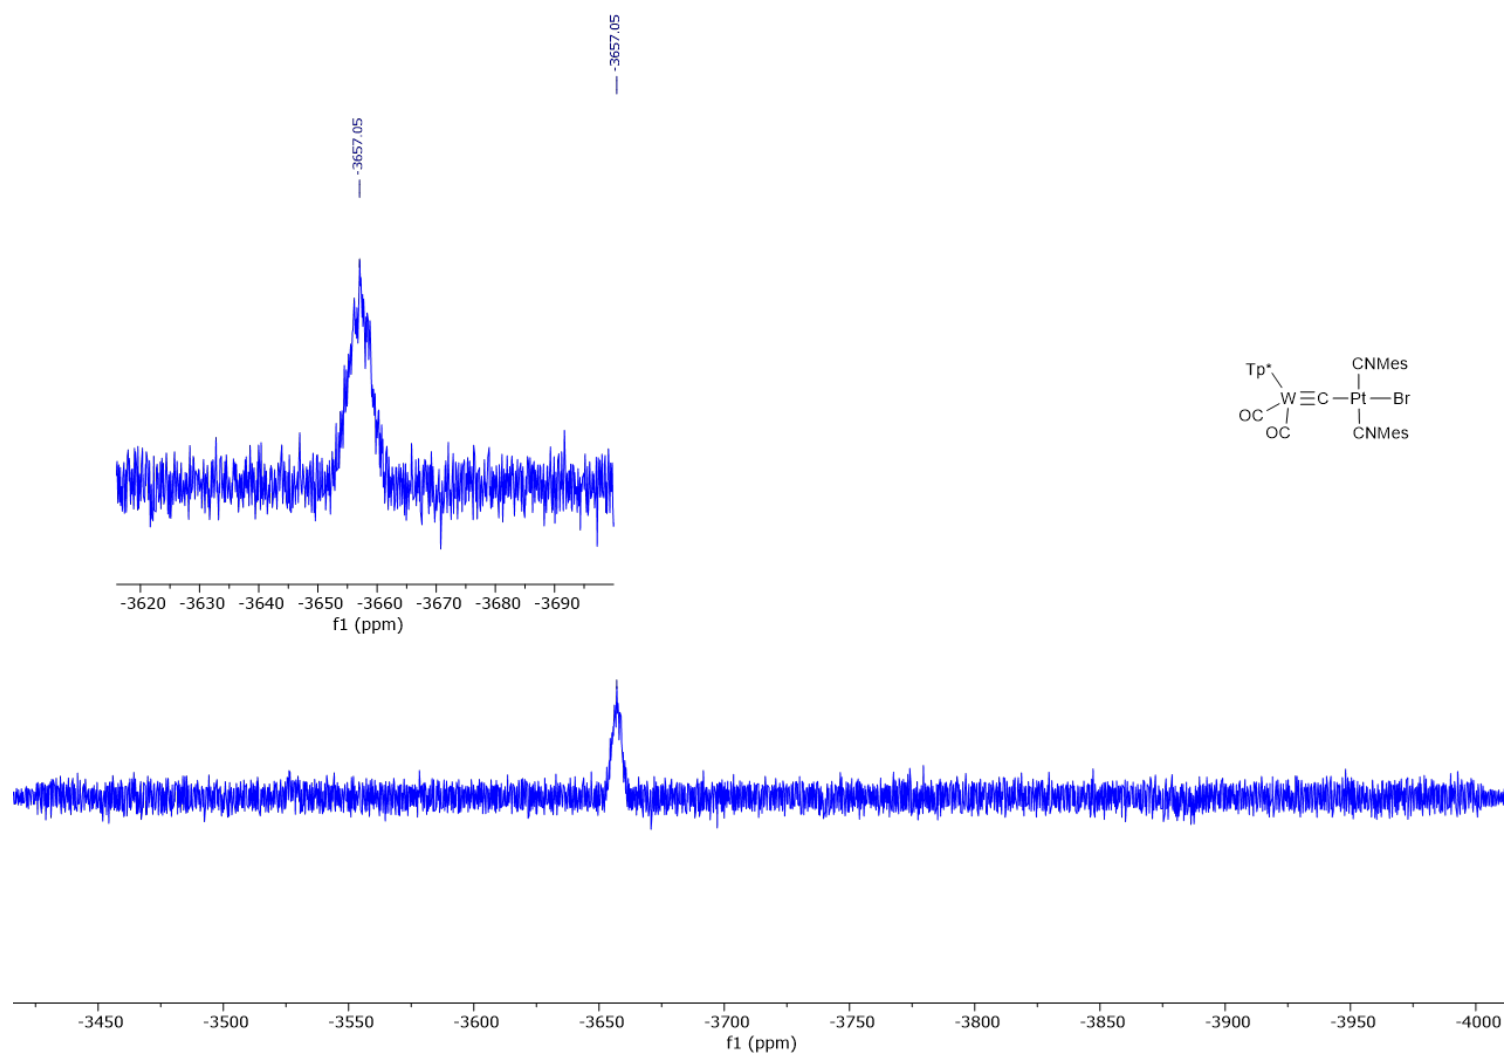

**Figure S63:**  $^{195}\text{Pt}\{^1\text{H}\}$  NMR Spectrum [WPt( $\mu_2$ -C)Br(CNC<sub>6</sub>H<sub>2</sub>Me<sub>3</sub>-2,4,6)<sub>2</sub>(CO)<sub>2</sub>(Tp\*)] (**5b**) (86 MHz, CDCl<sub>3</sub>, 25 °C,  $\delta$ )

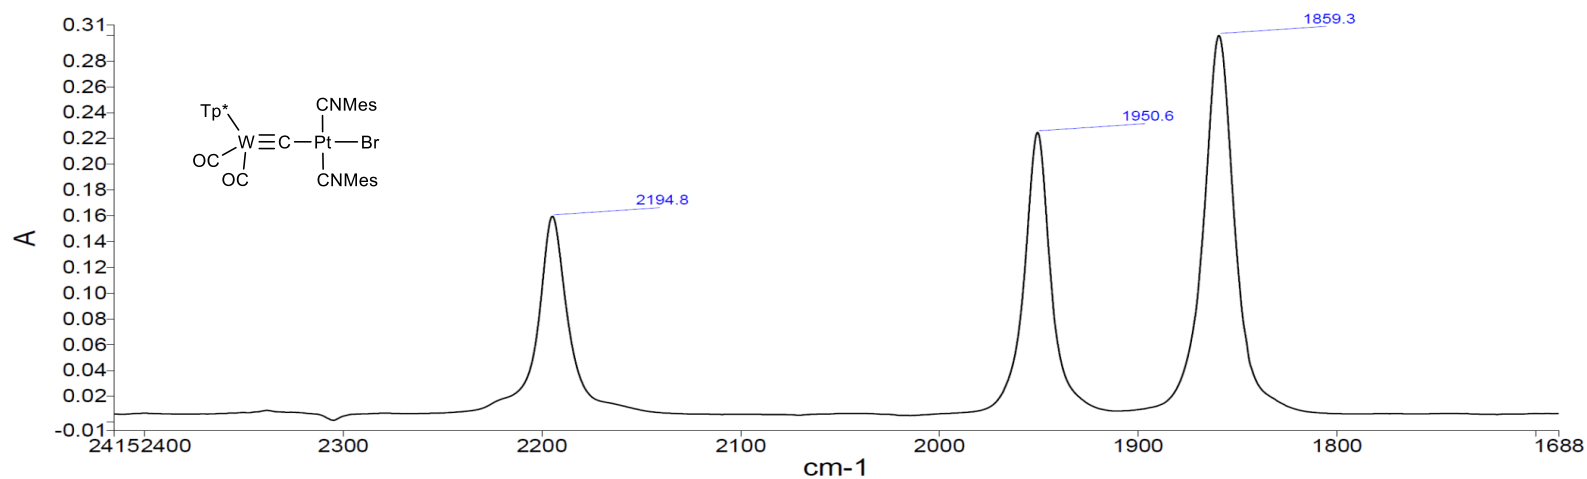

Figure S64: Infrared Spectrum of  $[\text{WPt}(\mu_2\text{-C})\text{Br}(\text{CNC}_6\text{H}_2\text{Me}_3\text{-2,4,6})_2(\text{CO})_2(\text{Tp}^*)]$  (**5b**) ( $\text{CH}_2\text{Cl}_2$ , 25 °C, v)

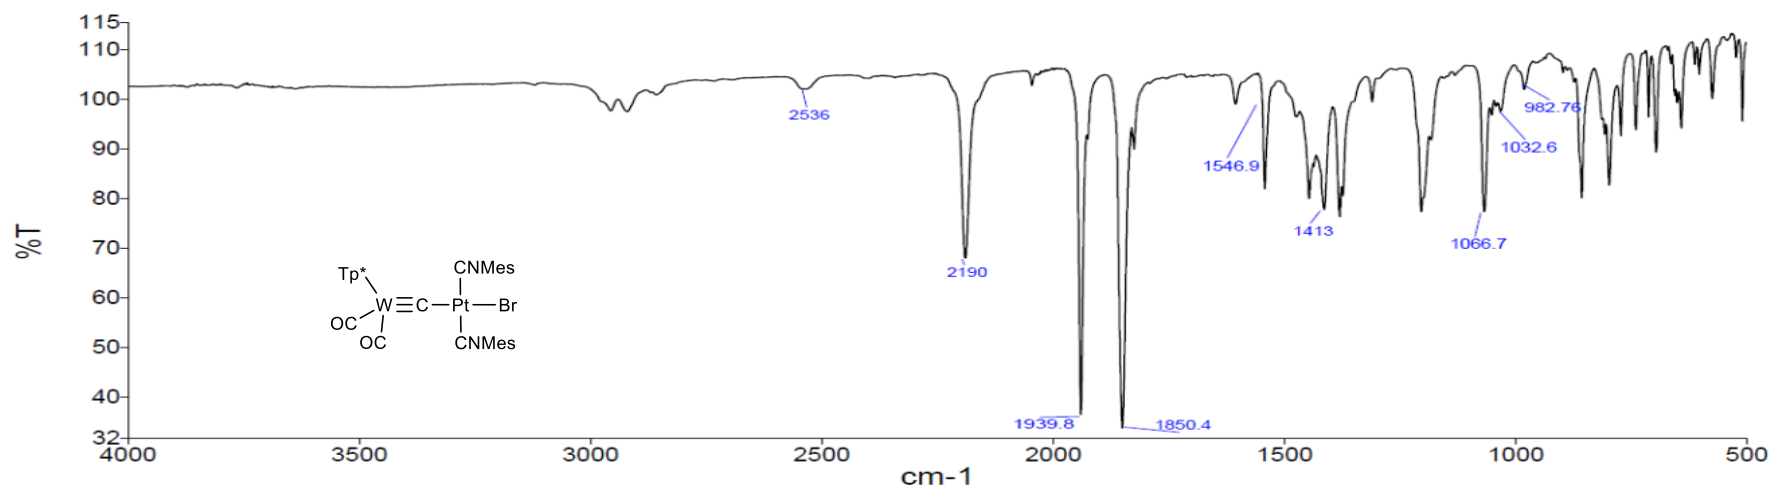

Figure S65: Infrared Spectrum of  $[\text{WPt}(\mu_2\text{-C})\text{Br}(\text{CNC}_6\text{H}_2\text{Me}_3\text{-2,4,6})_2(\text{CO})_2(\text{Tp}^*)]$  (**5b**) (ATR, 25 °C, v)

## SUPPORTING INFORMATION

## Dalton Transactions

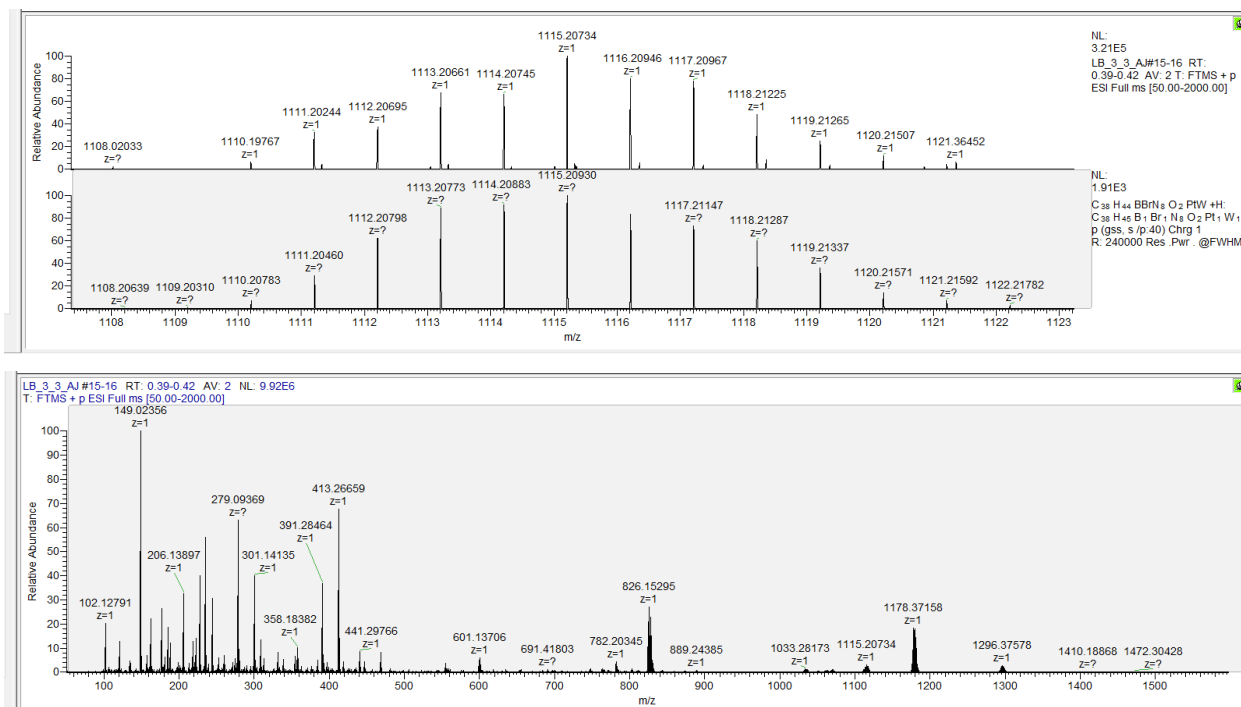

Figure S66: Mass Spectrum of  $[\text{WPt}(\mu_2\text{-C})\text{Br}(\text{CNC}_6\text{H}_2\text{Me}_3\text{-2,4,6})_2(\text{CO})_2(\text{Tp}^*)] (\mathbf{5b})$



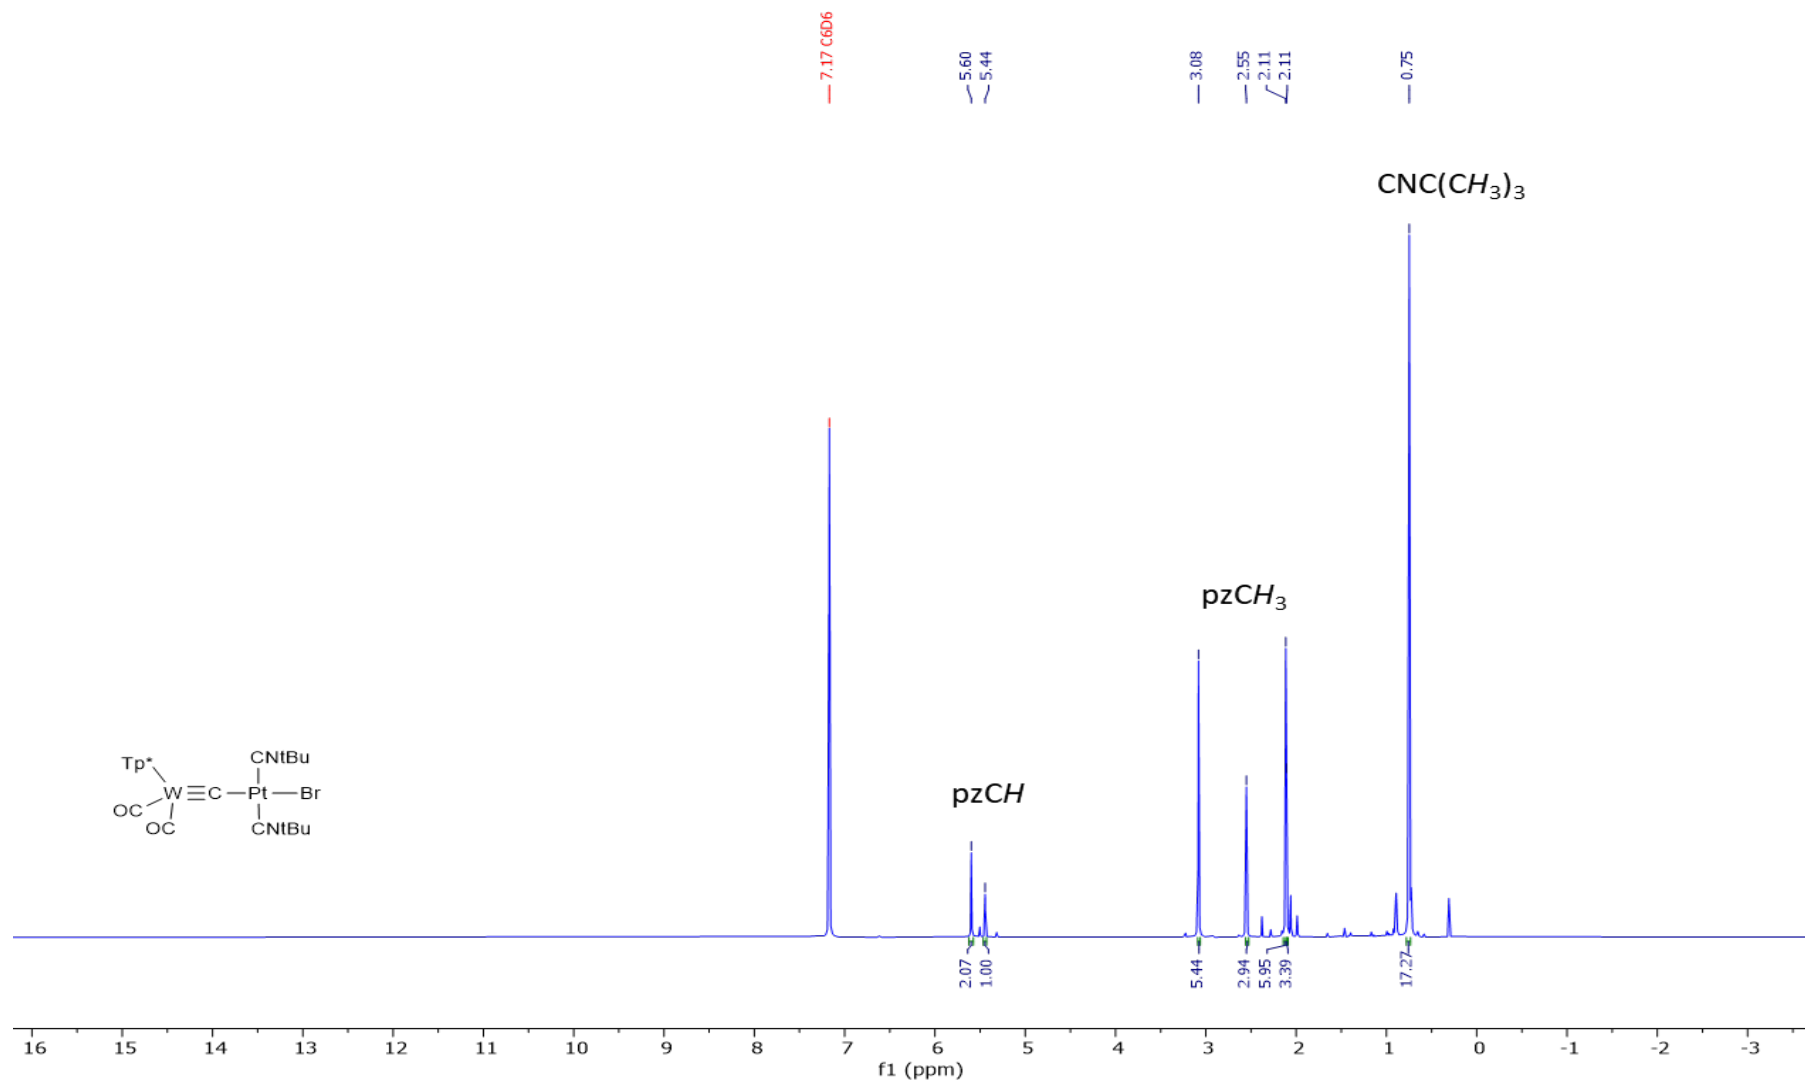

Figure S67:  $^1\text{H}$  NMR Spectrum of  $[\text{WPt}(\mu_2\text{-C})\text{Br}(\text{CN}^t\text{Bu})_2(\text{CO})_2(\text{Tp}^*)]$  (5c) (400 MHz,  $\text{CDCl}_3$ , 25 °C,  $\delta$ )

## SUPPORTING INFORMATION

## Dalton Transactions

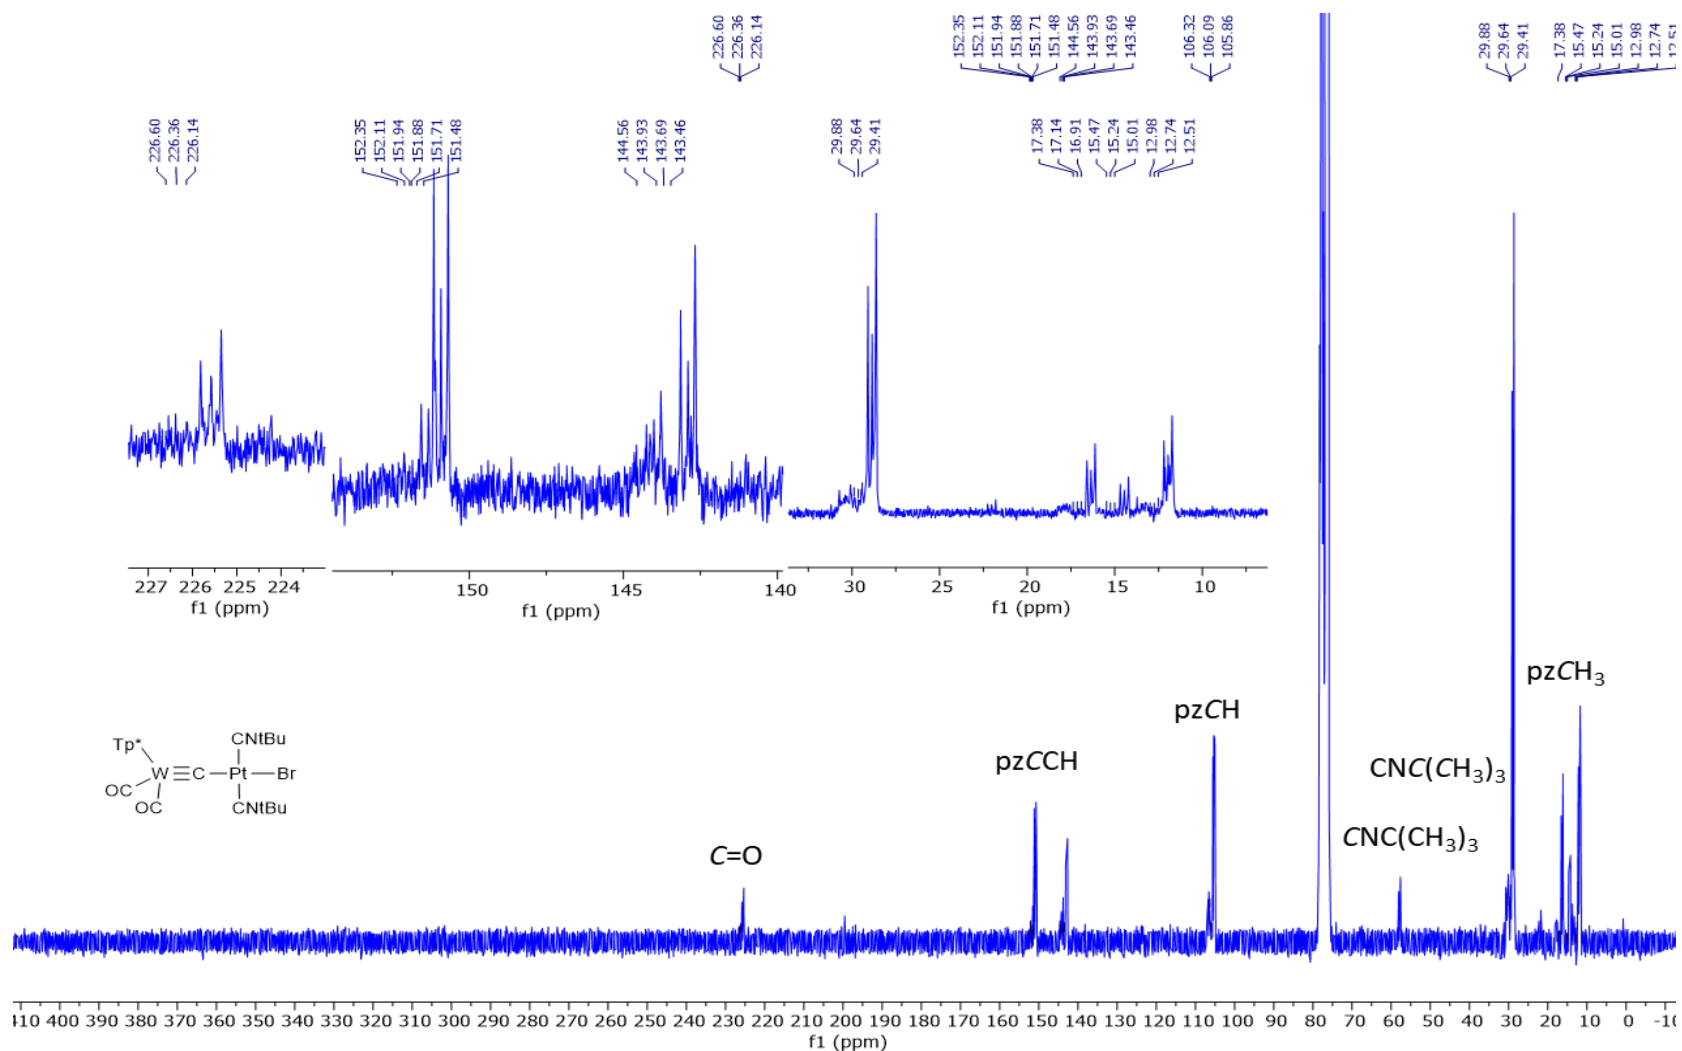

LB-3-19/5

 $^{13}\text{C}$ -HMBC w/ suppression of direct correlations, optimal for  $J(\text{HC}) = 8 \text{ Hz}$  (hmbcC.go - hmbcetgpl2nd)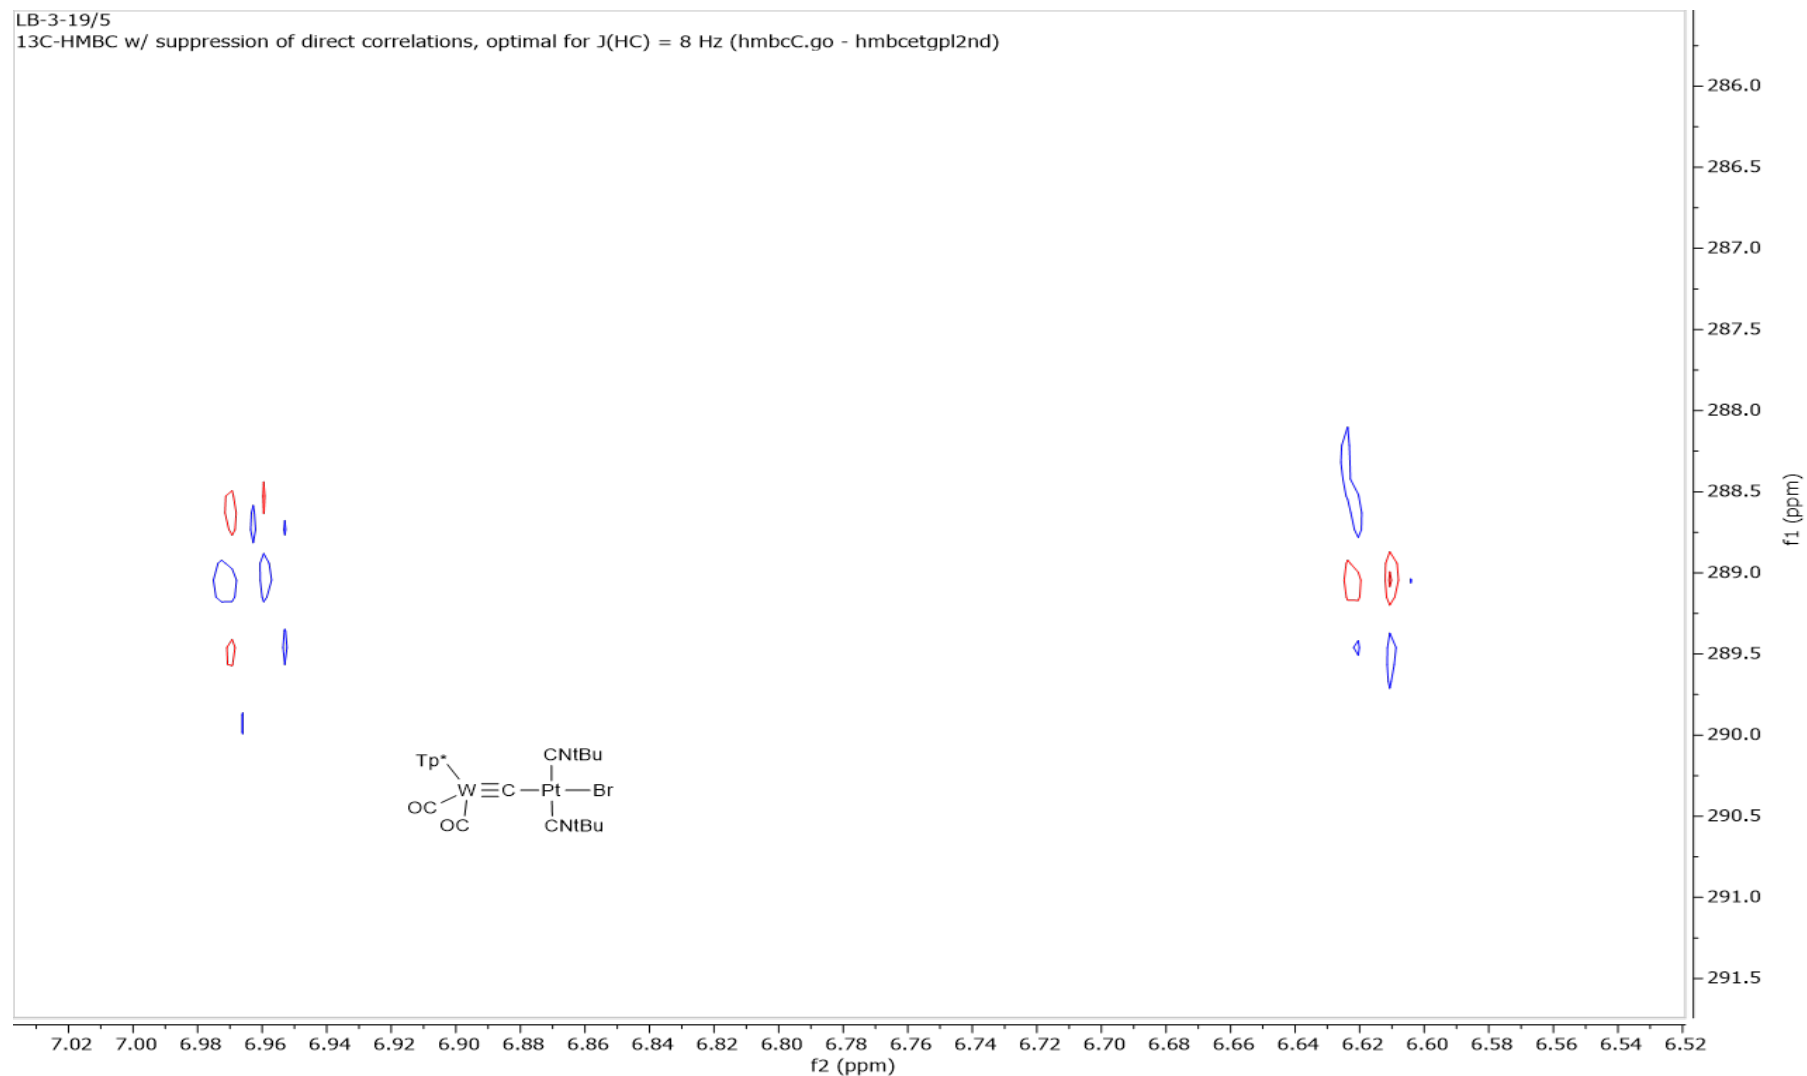**Figure S69:**  $^{13}\text{C}$ - $^1\text{H}$  HMBC Spectrum of  $[\text{WPt}(\mu_2\text{-C})\text{Br}(\text{CN}^i\text{Bu})_2(\text{CO})_2(\text{Tp}^*)]$  (**5c**) (151 MHz, 600 MHz,  $\text{CDCl}_3$ , 25 °C,  $\delta$ )

## SUPPORTING INFORMATION

## Dalton Transactions

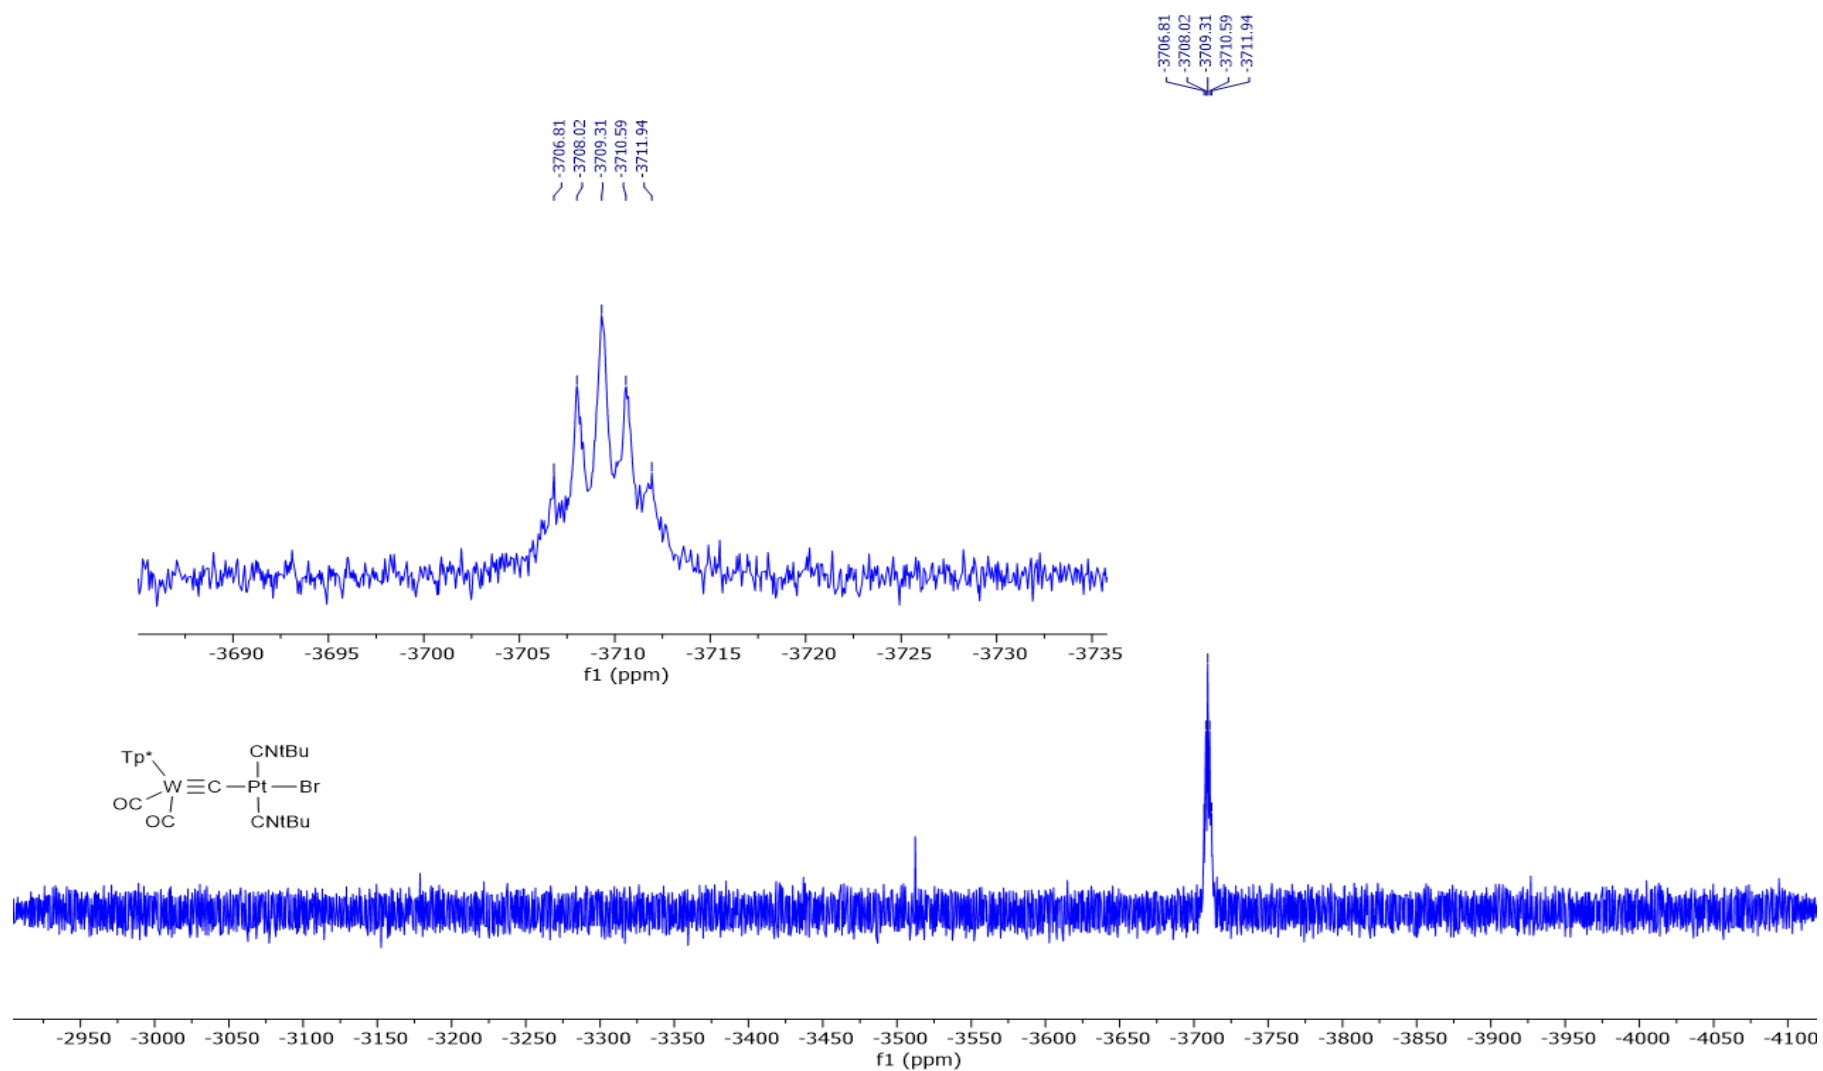

Figure S70:  $^{195}\text{Pt}\{^1\text{H}\}$  NMR Spectrum of  $[\text{WPt}(\mu_2\text{-C})\text{Br}(\text{CNtBu})_2(\text{CO})_2(\text{Tp}^*)]$  (5c) (86 MHz,  $\text{CDCl}_3$ ,  $25^\circ\text{C}$ ,  $\delta$ )

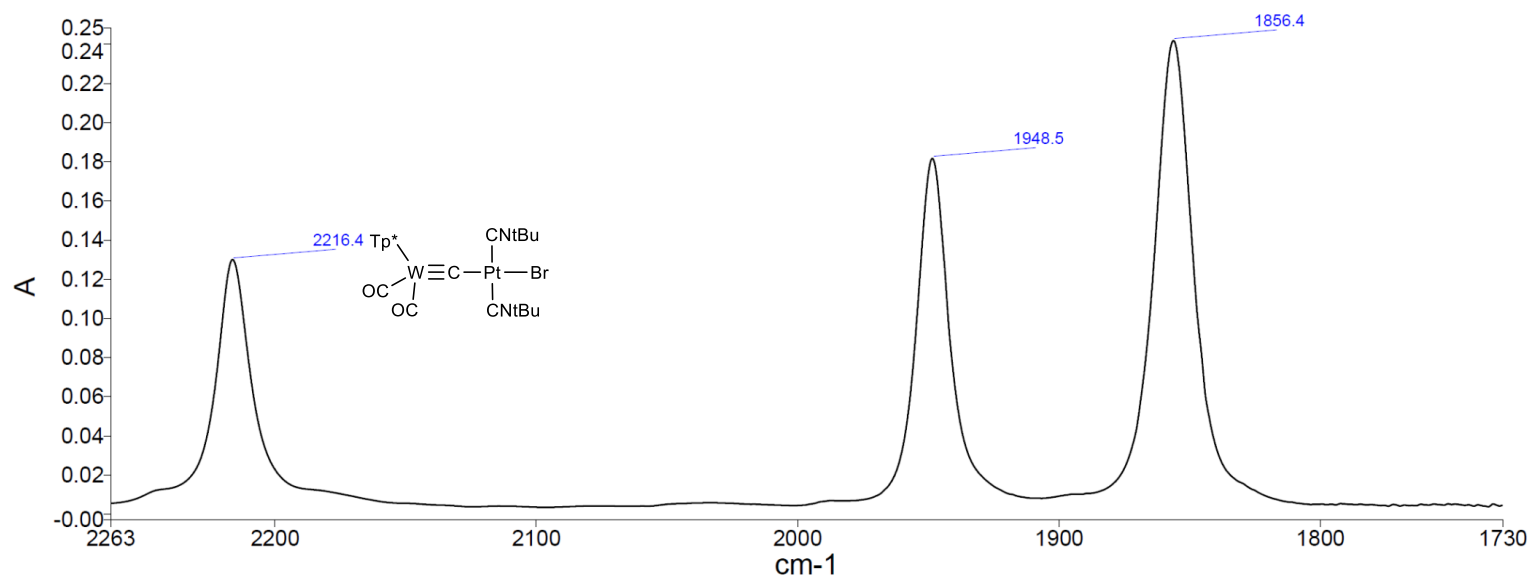

Figure S71: Infrared Spectrum of [WPt(μ<sub>2</sub>-C)Br(CNtBu)<sub>2</sub>(CO)<sub>2</sub>(Tp\*)] (5c) (CH<sub>2</sub>Cl<sub>2</sub>, 25 °C, v)

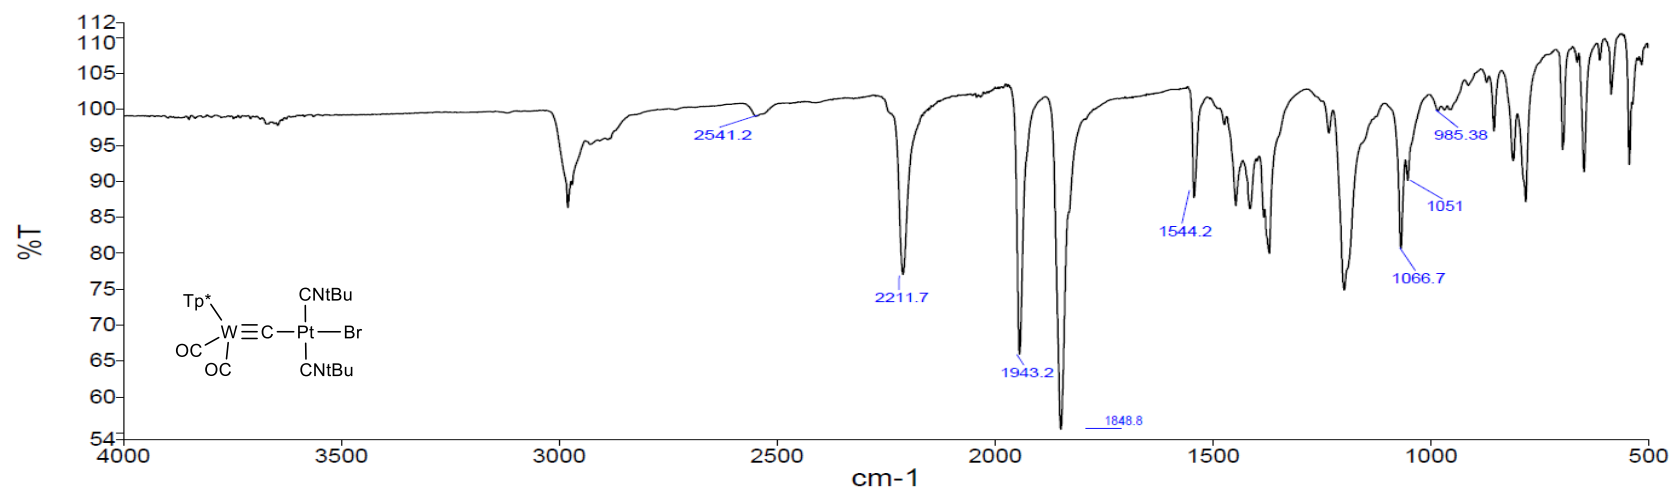

Figure S72: Infrared Spectrum of [WPt(μ<sub>2</sub>-C)Br(CNtBu)<sub>2</sub>(CO)<sub>2</sub>(Tp\*)] (5c) (ATR, 25 °C, v)

## SUPPORTING INFORMATION

## Dalton Transactions

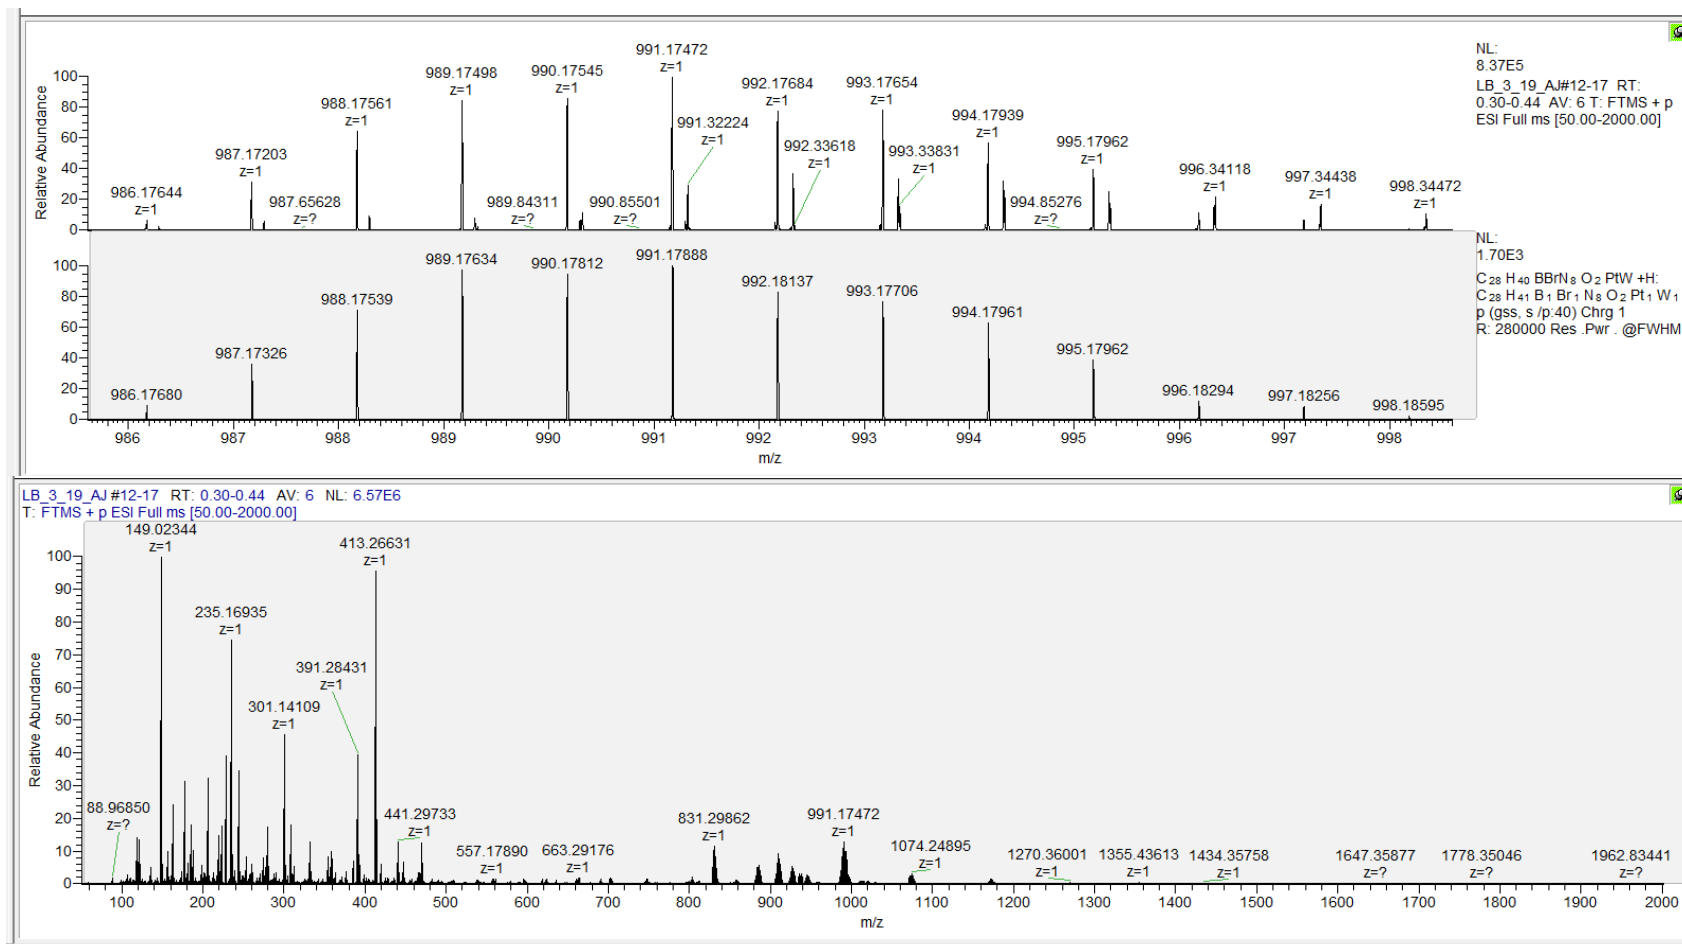

Figure S73: Mass Spectrum of  $[\text{Wpt}(\mu_2\text{-C})\text{Br}(\text{CN}^i\text{Bu})_2(\text{CO})_2(\text{Tp}^*)] (\mathbf{5c})$

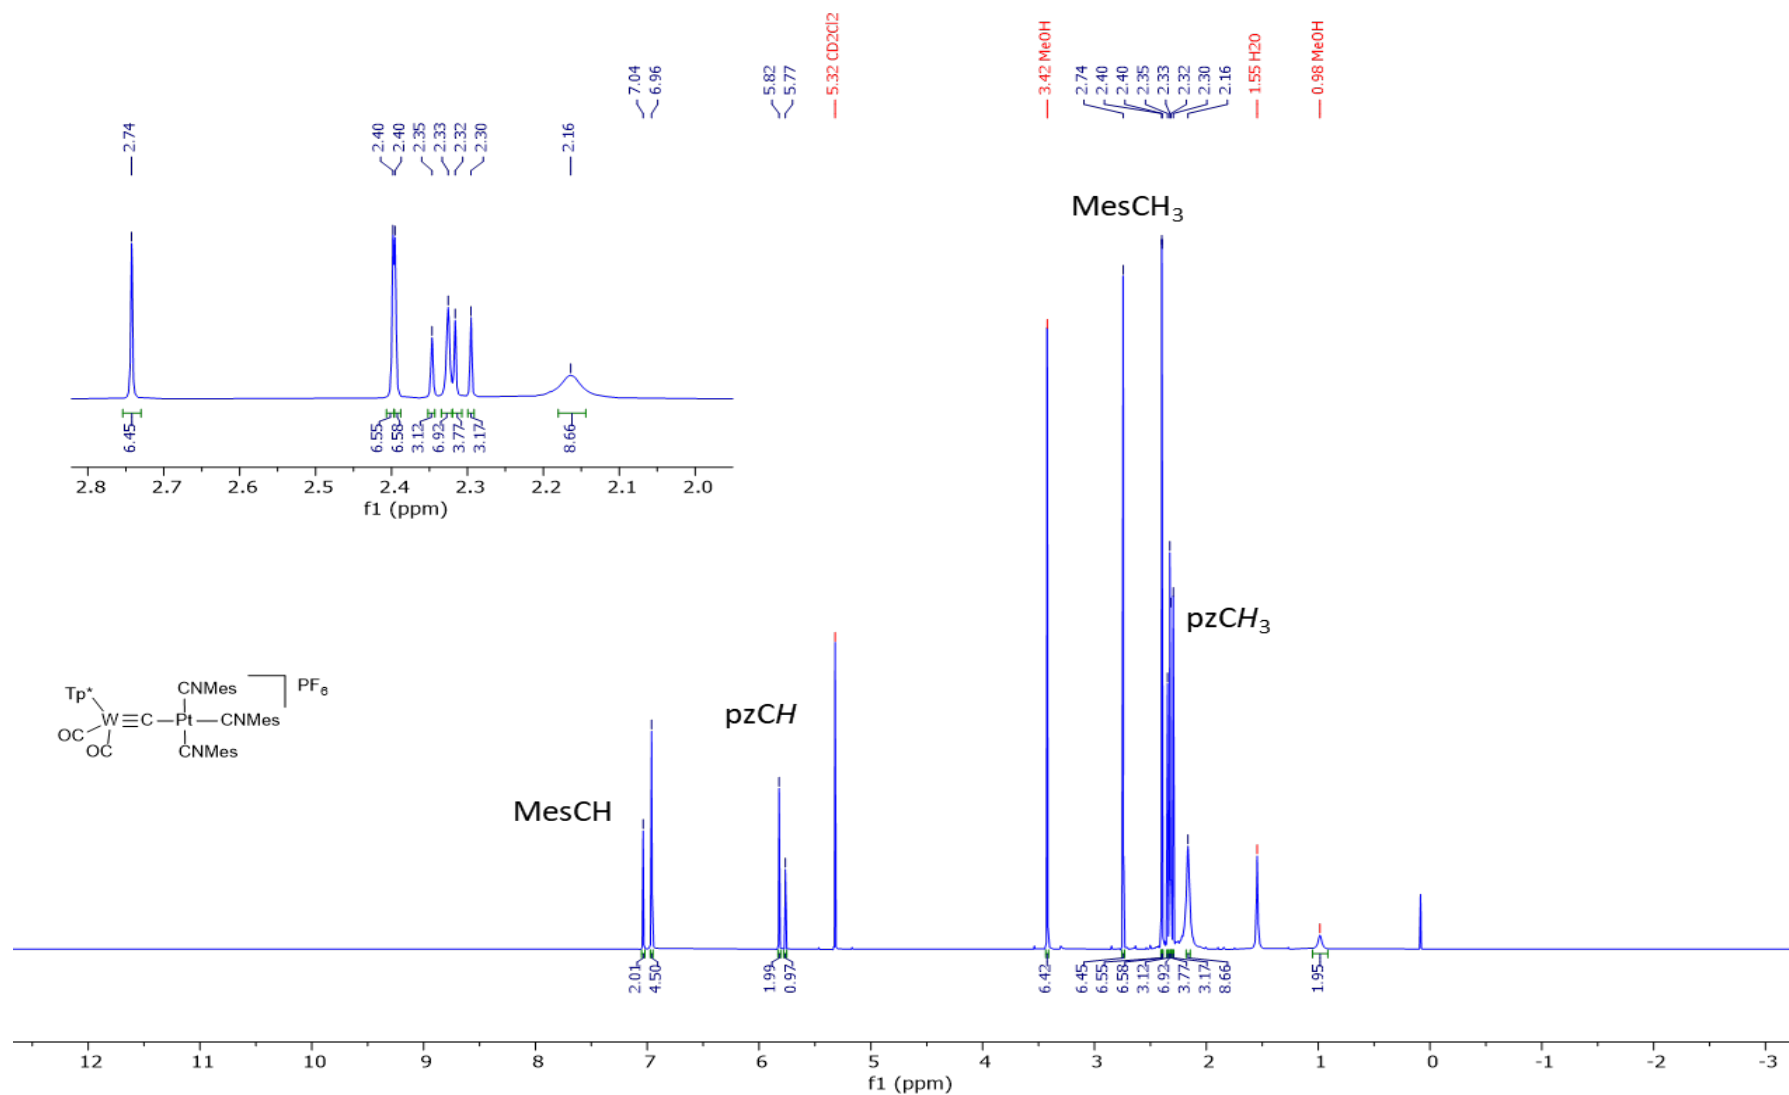

**Figure S74:**  $^1\text{H}$  NMR Spectrum of  $[\text{WPT}(\mu_2\text{-C})(\text{CNC}_6\text{H}_2\text{Me}_3\text{-2,4,6})_3(\text{CO})_2(\text{Tp}^*)]\text{PF}_6$  (**6**) (600 MHz,  $\text{CD}_2\text{Cl}_2$ , 25 °C,  $\delta$ )

## SUPPORTING INFORMATION

## Dalton Transactions

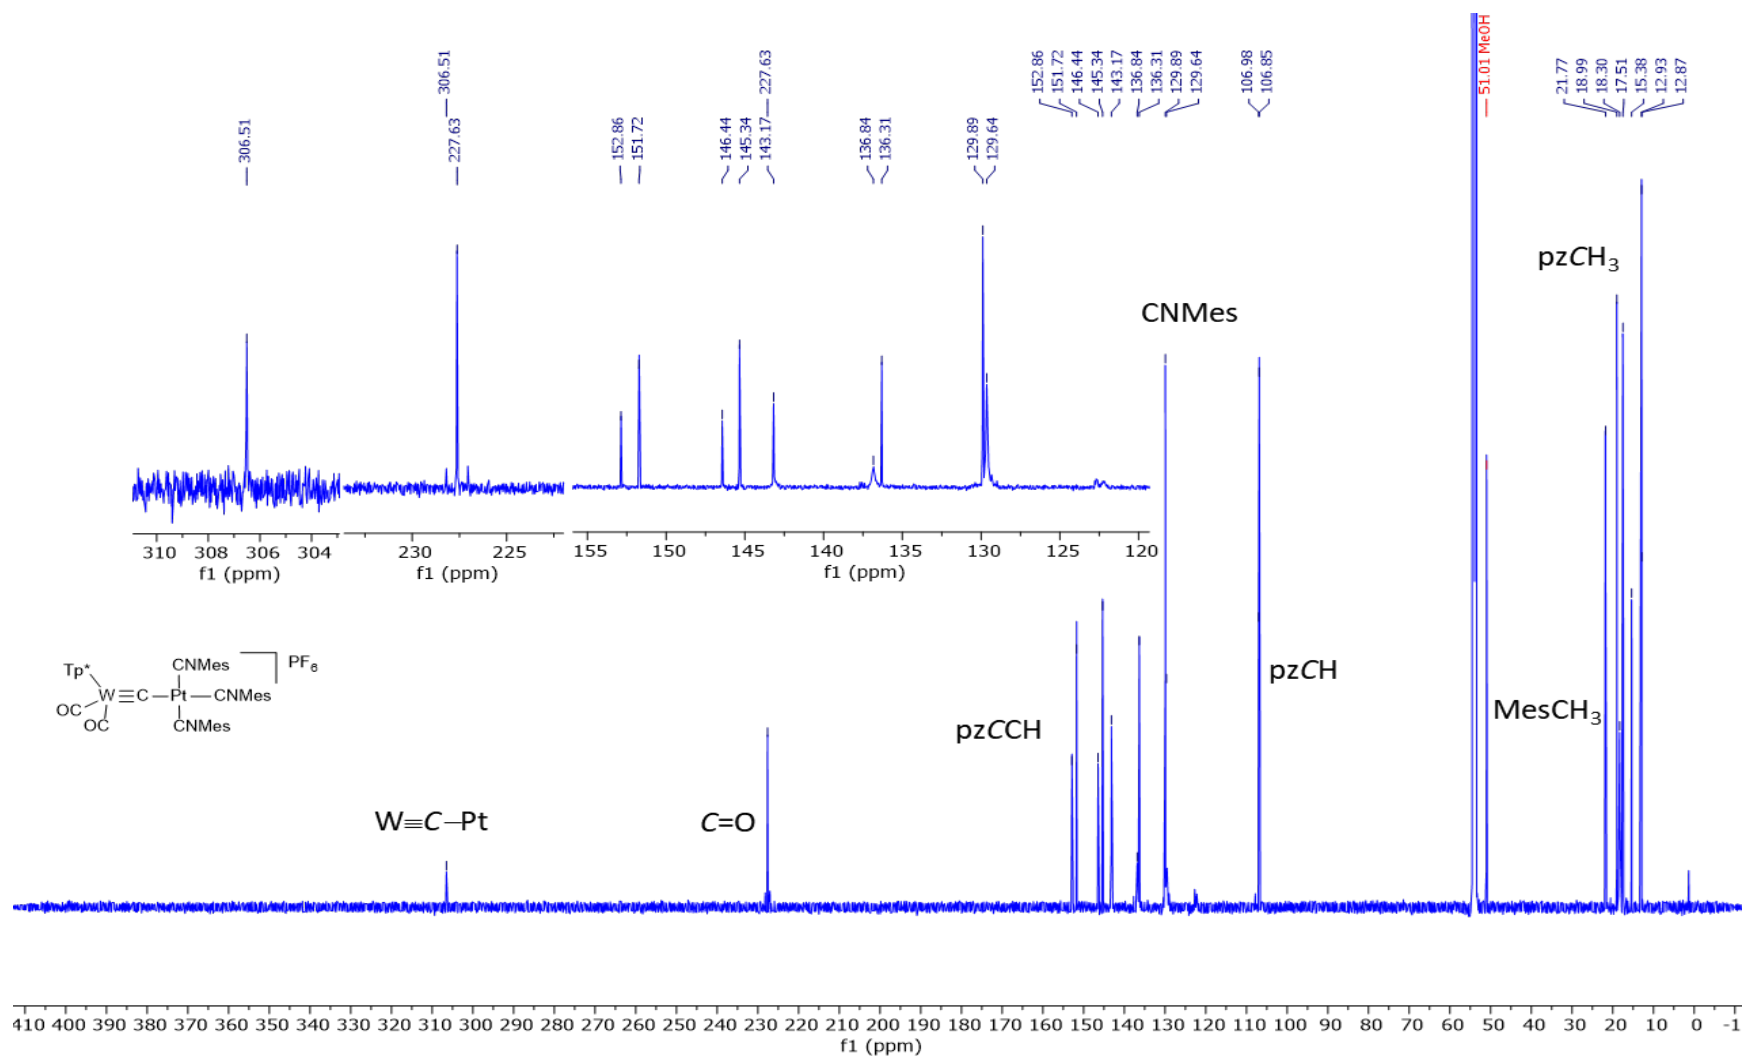



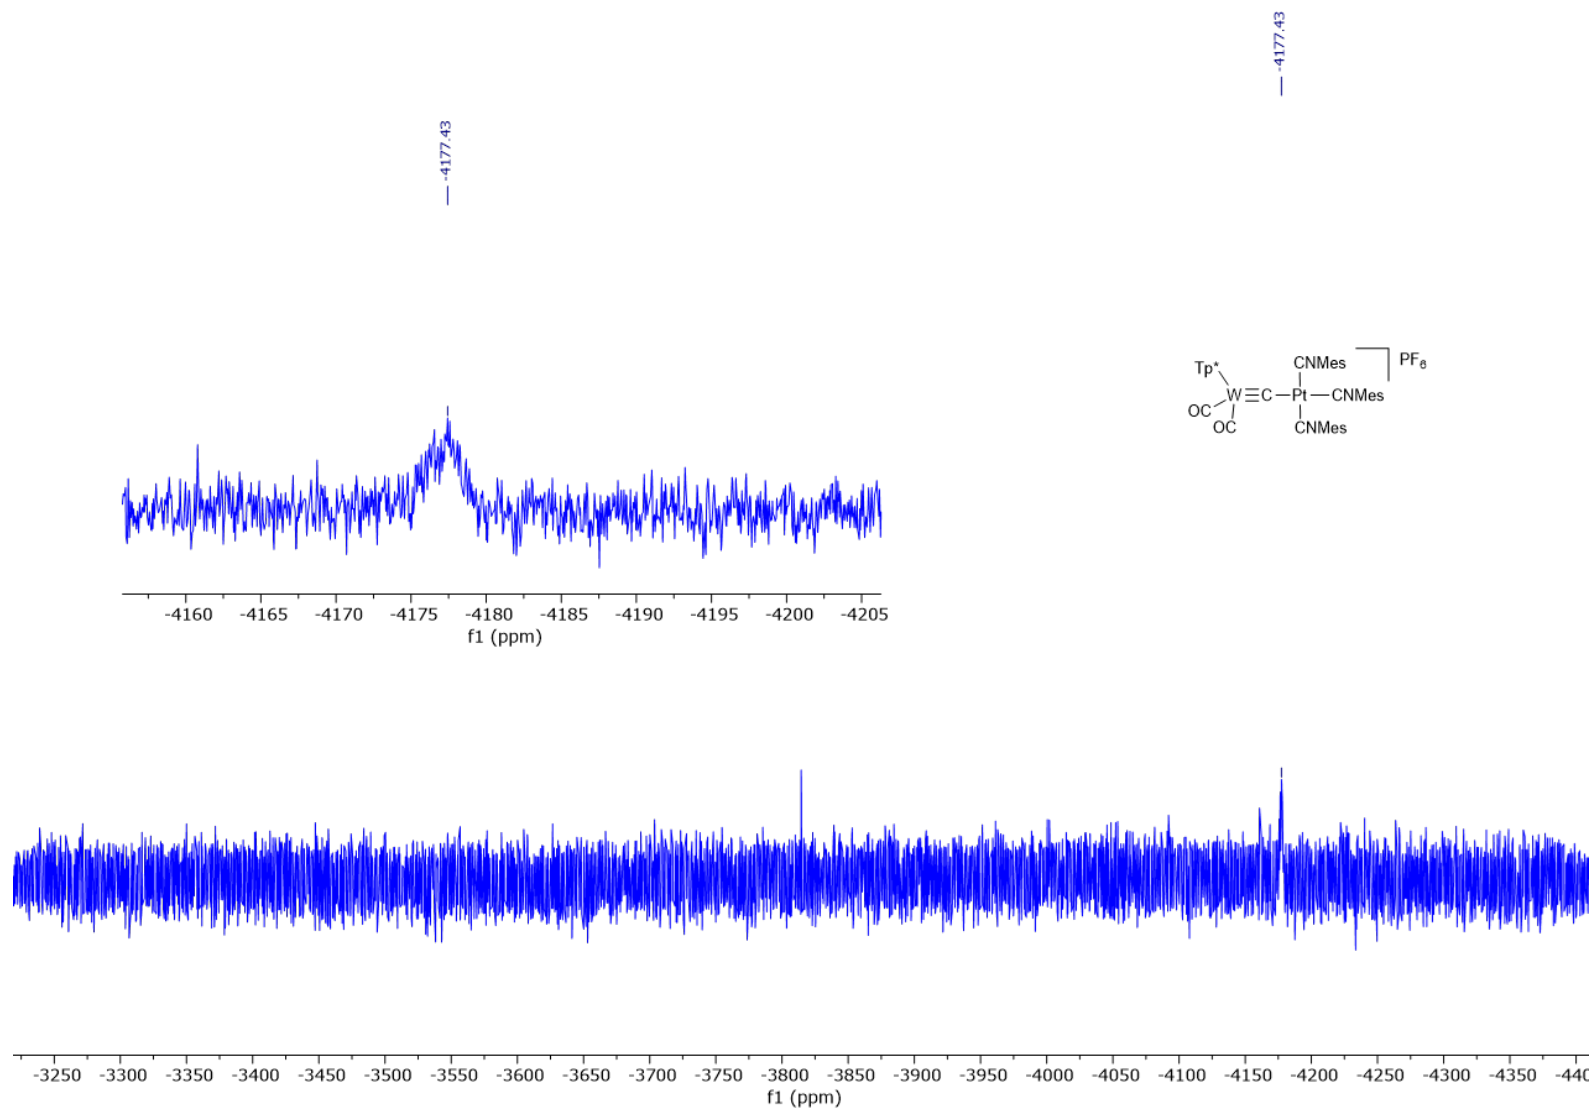

**Figure S76:**  $^{195}\text{Pt}\{^1\text{H}\}$  NMR Spectrum of of  $[\text{W}(\text{Tp}^*)(\mu\text{-C}(\text{CNMe})_3)(\text{CO})_2]\text{PF}_6$  (**6**) (150 MHz,  $\text{CD}_2\text{Cl}_2$ , 25 °C,  $\delta$ )

## SUPPORTING INFORMATION

Dalton Transactions

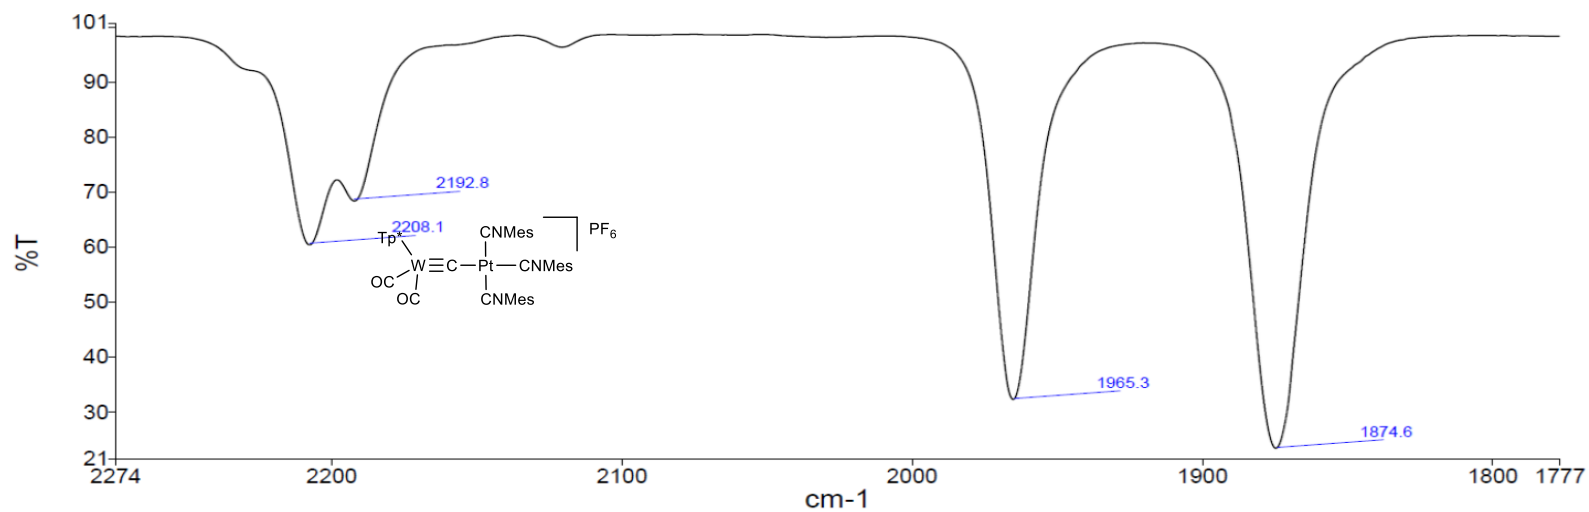

Figure S77: Infrared Spectrum of of  $[WPt(\mu_2-C)(CNC_6H_2Me_3-2,4,6)_3(CO)_2(Tp^*)]PF_6$  (6) ( $CH_2Cl_2$ , 25 °C, v)

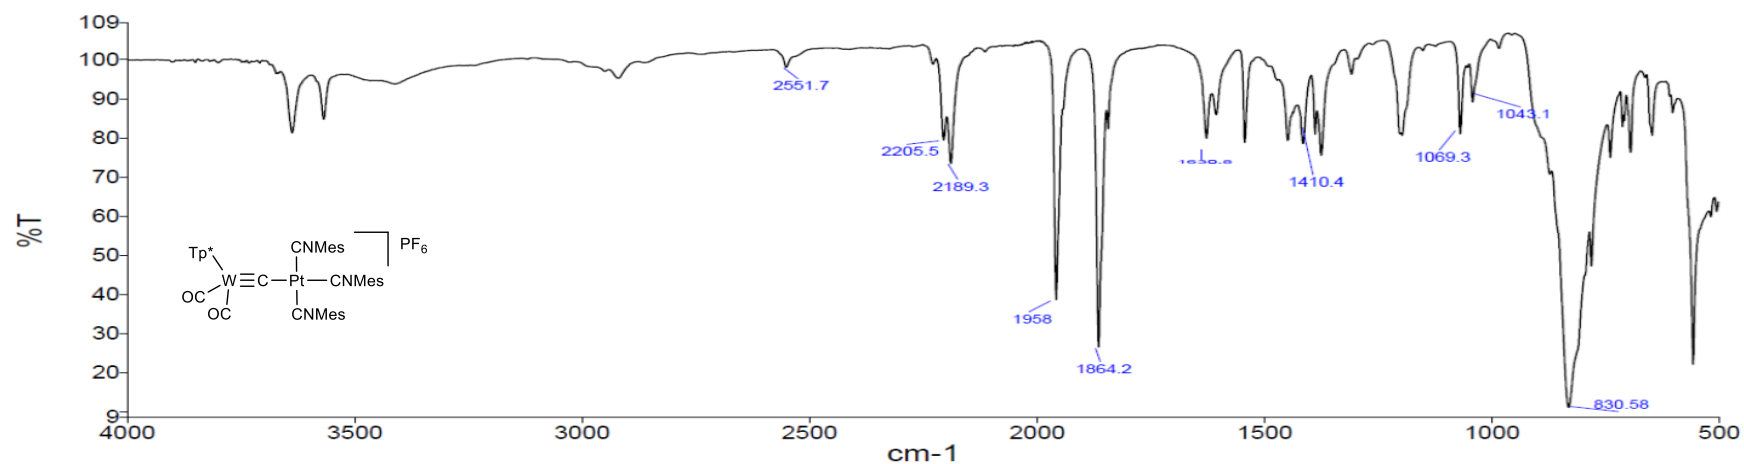

Figure S78: Infrared Spectrum of of  $[WPt(\mu_2-C)(CNC_6H_2Me_3-2,4,6)_3(CO)_2(Tp^*)]PF_6$  (6) (ATR, 25 °C, v)

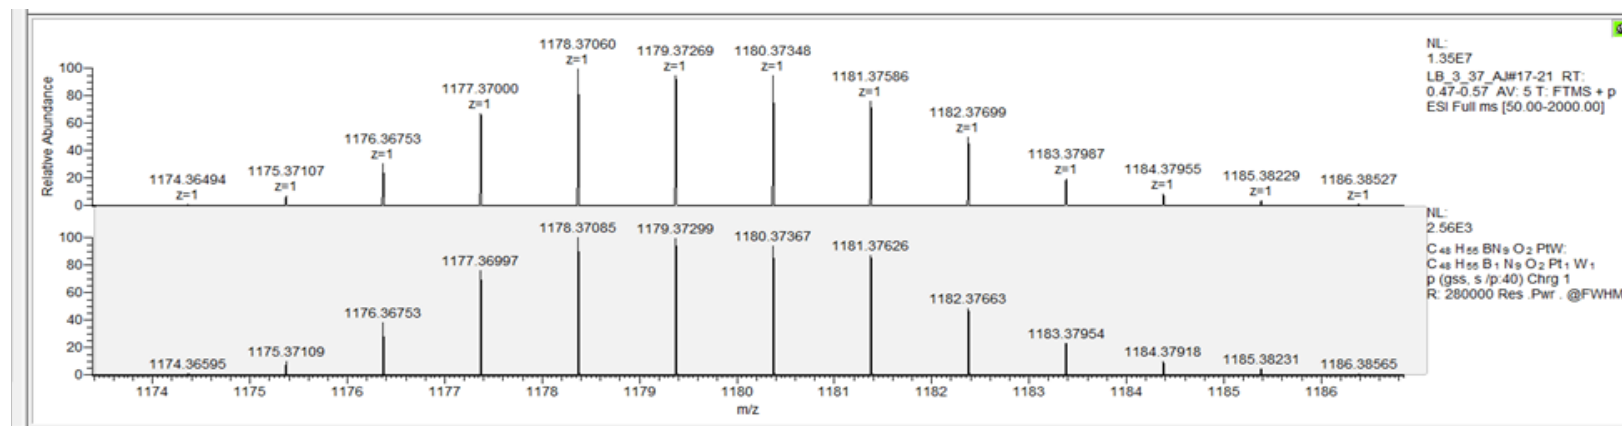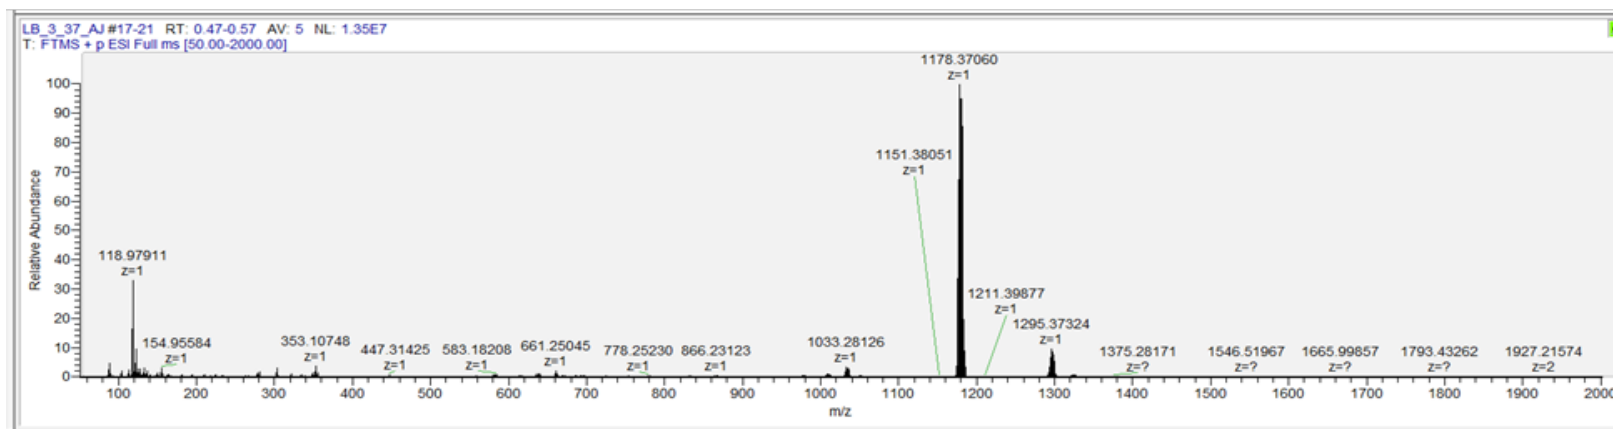

Figure S79: Mass Spectrum of of  $[\text{WPt}(\mu_2\text{-C})(\text{CNC}_6\text{H}_2\text{Me}_3\text{-2,4,6})_3(\text{CO})_2(\text{Tp}^*)]\text{PF}_6$  (6)

## SUPPORTING INFORMATION

## Dalton Transactions

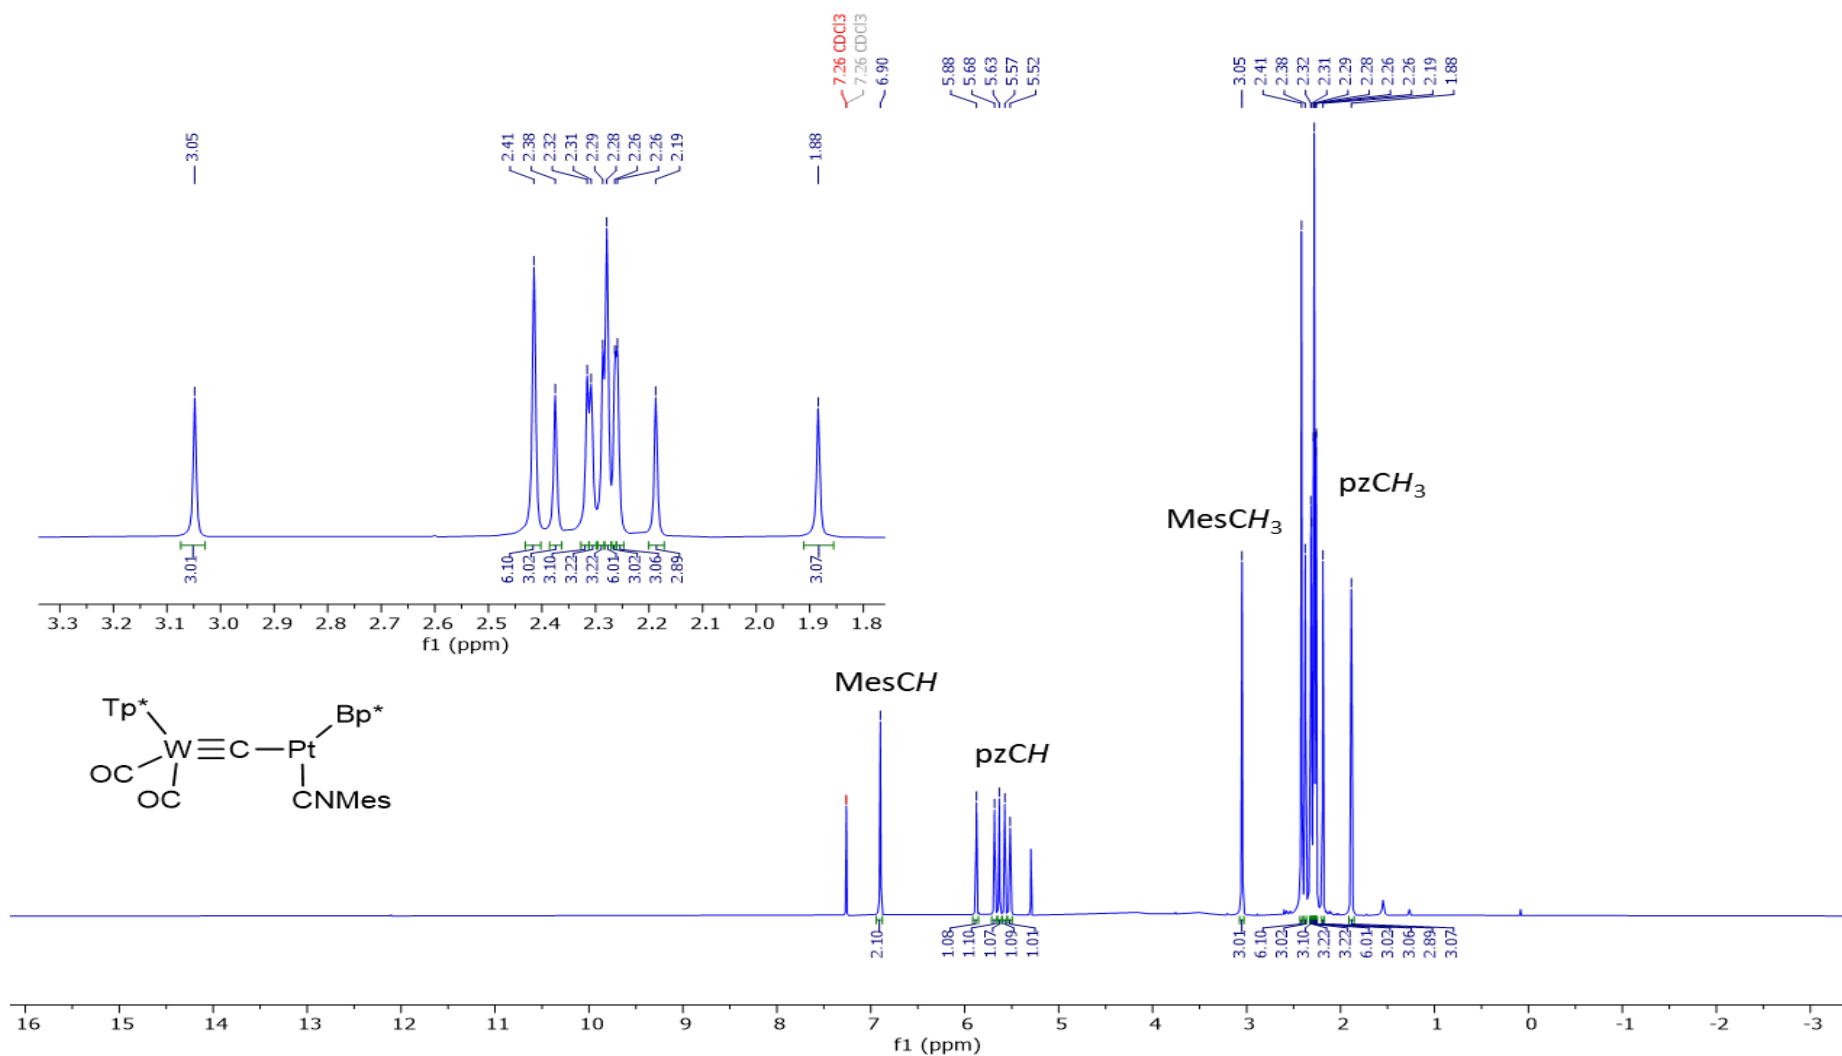

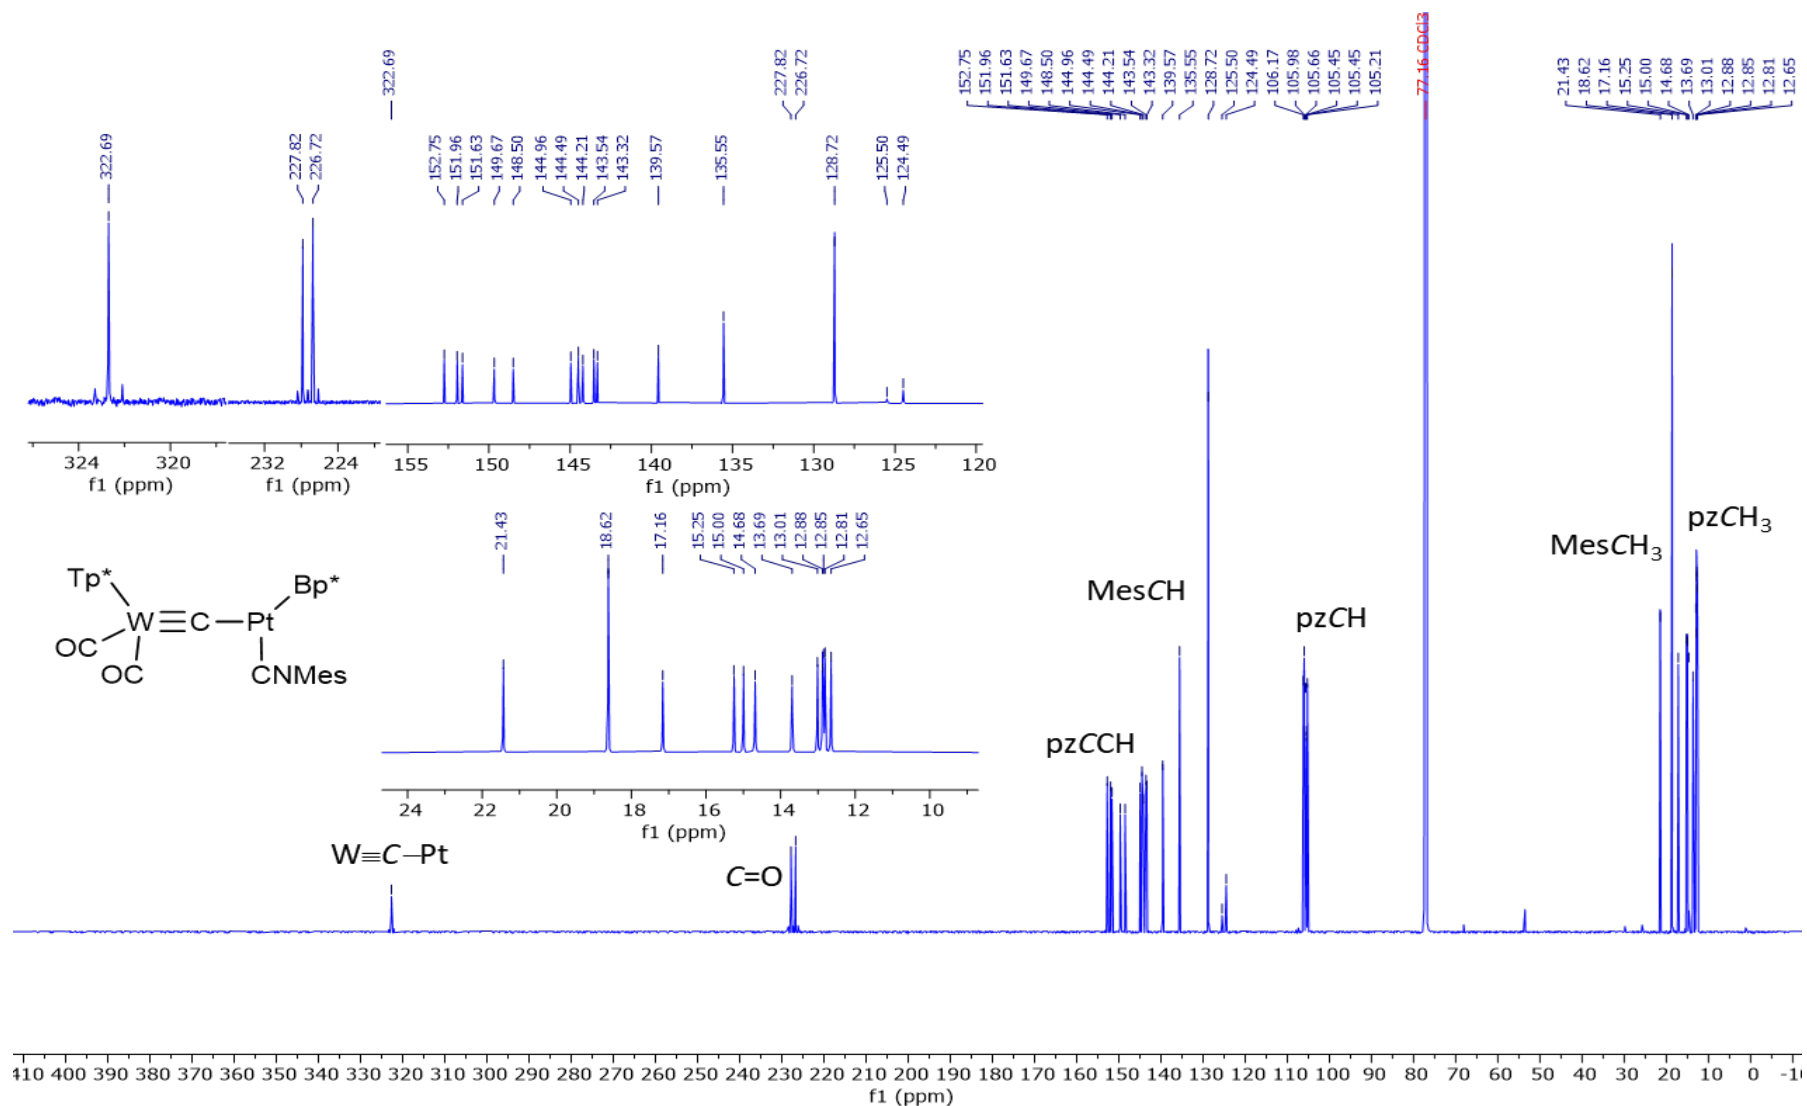

Figure S81:  $^{13}\text{C}\{^1\text{H}\}$  NMR Spectrum of  $[\text{WPt}(\mu_2\text{-C})(\text{CNC}_6\text{H}_2\text{Me}_3\text{-2,4,6})(\text{CO})_2(\text{Bp}^*)(\text{Tp}^*)]$  (**8a**) (151 MHz,  $\text{CDCl}_3$ , 25 °C,  $\delta$ )

SUPPORTING INFORMATION

Dalton Transactions

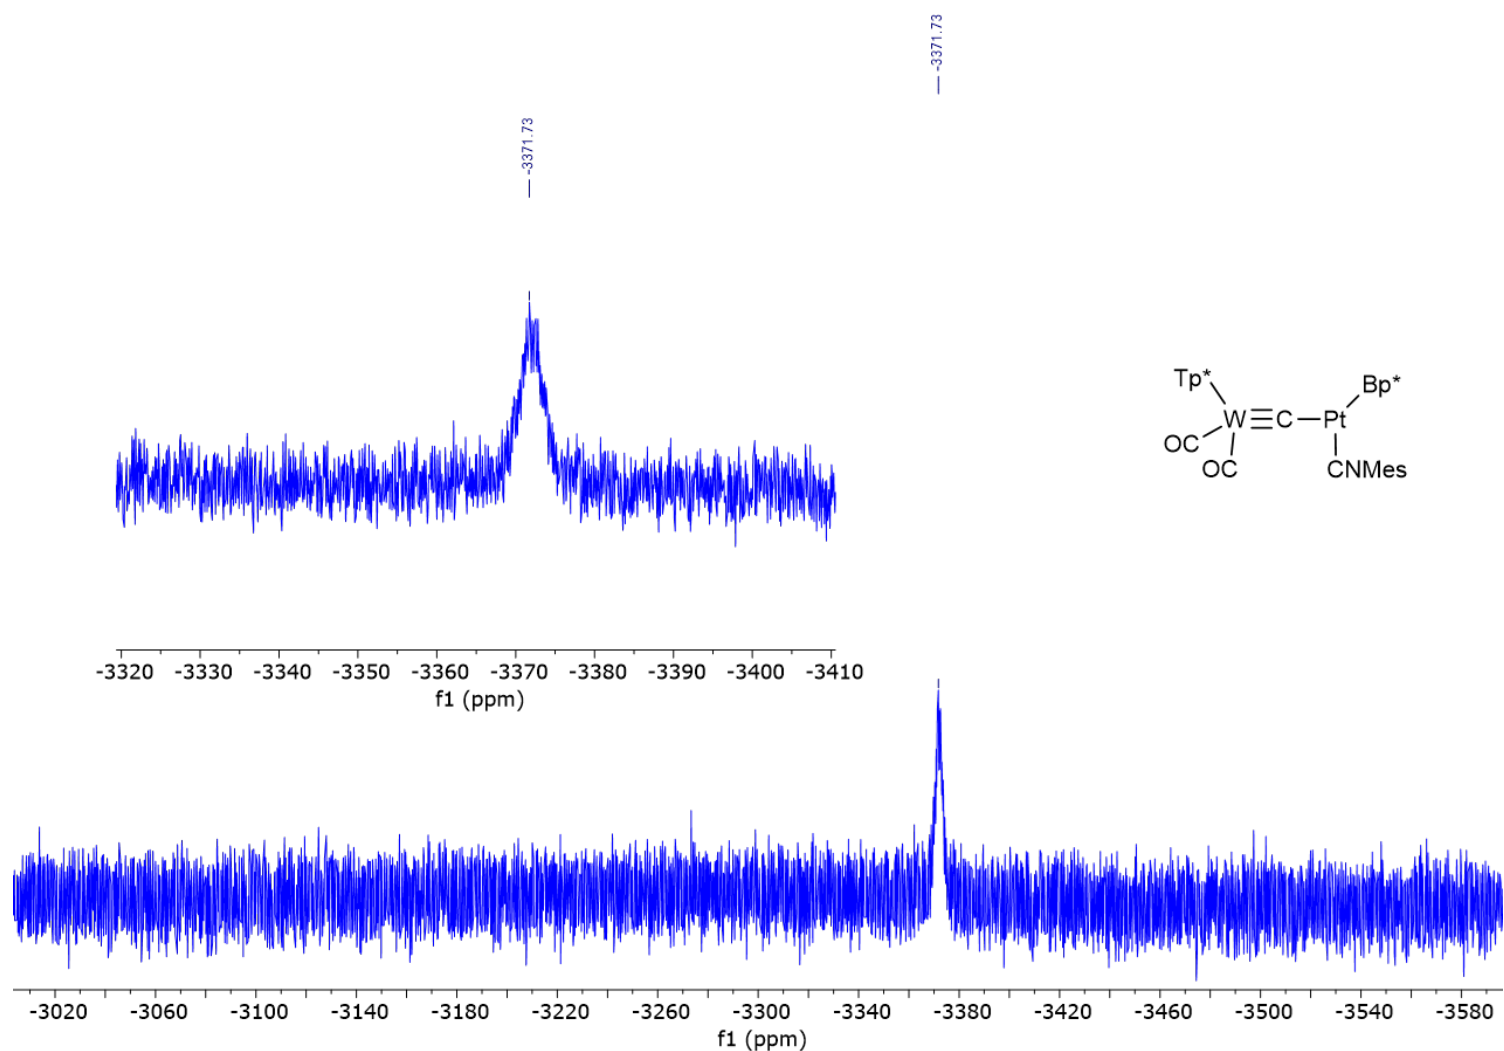

**Figure S82:**  $^{195}\text{Pt}\{^1\text{H}\}$  NMR Spectrum of  $[\text{WPt}(\mu_2\text{-C})(\text{CNC}_6\text{H}_2\text{Me}_3\text{-2,4,6})(\text{CO})_2(\text{Bp}^*)(\text{Tp}^*)]$  (**8a**) (150 MHz,  $\text{CDCl}_3$ , 25 °C,  $\delta$ )

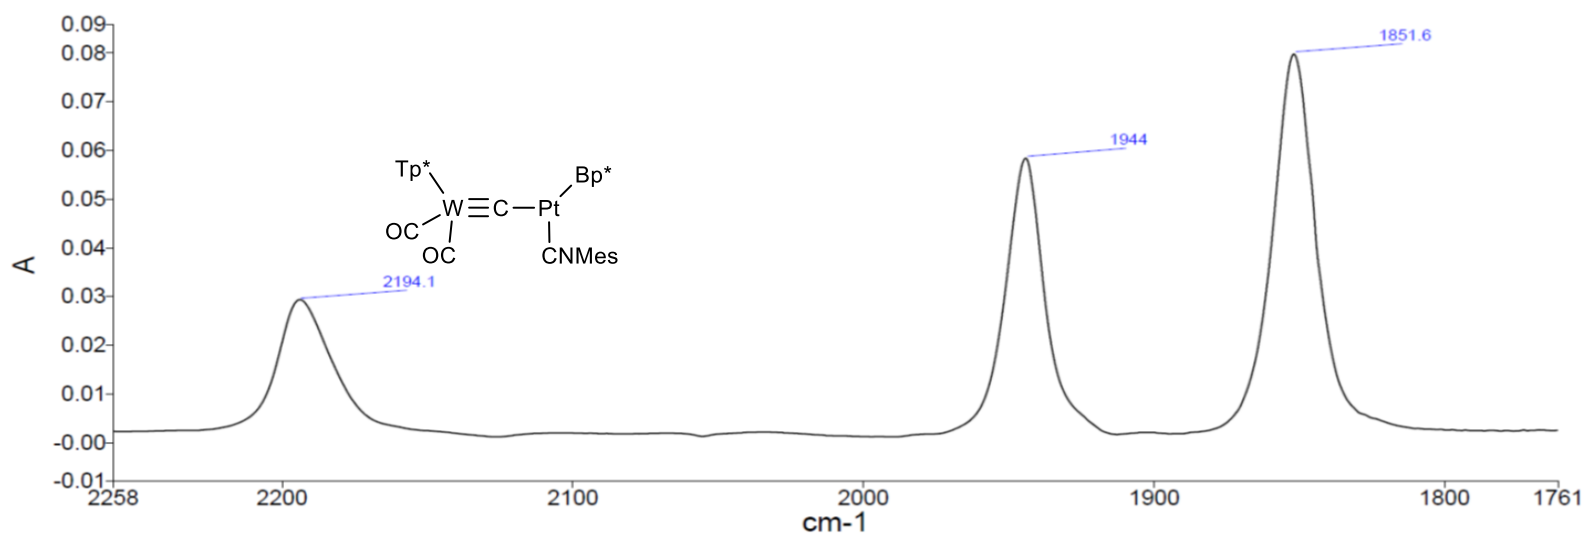

Figure S83: Infrared Spectrum of [WPt(μ<sub>2</sub>-C)(CNC<sub>6</sub>H<sub>2</sub>Me<sub>3</sub>-2,4,6)(CO)<sub>2</sub>(Bp\*)(Tp\*)] (**8a**) (CH<sub>2</sub>Cl<sub>2</sub>, 25 °C, v)

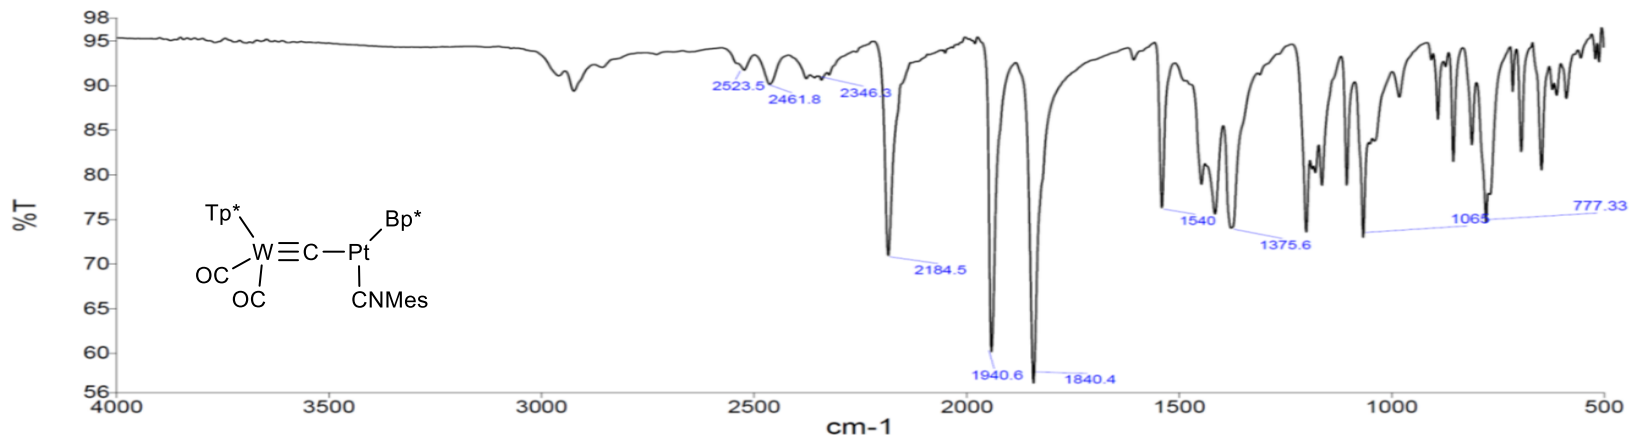

Figure S84: Infrared Spectrum of [WPt(μ<sub>2</sub>-C)(CNC<sub>6</sub>H<sub>2</sub>Me<sub>3</sub>-2,4,6)(CO)<sub>2</sub>(Bp\*)(Tp\*)] (**8a**) (ATR, 25 °C, v)

## SUPPORTING INFORMATION

## Dalton Transactions

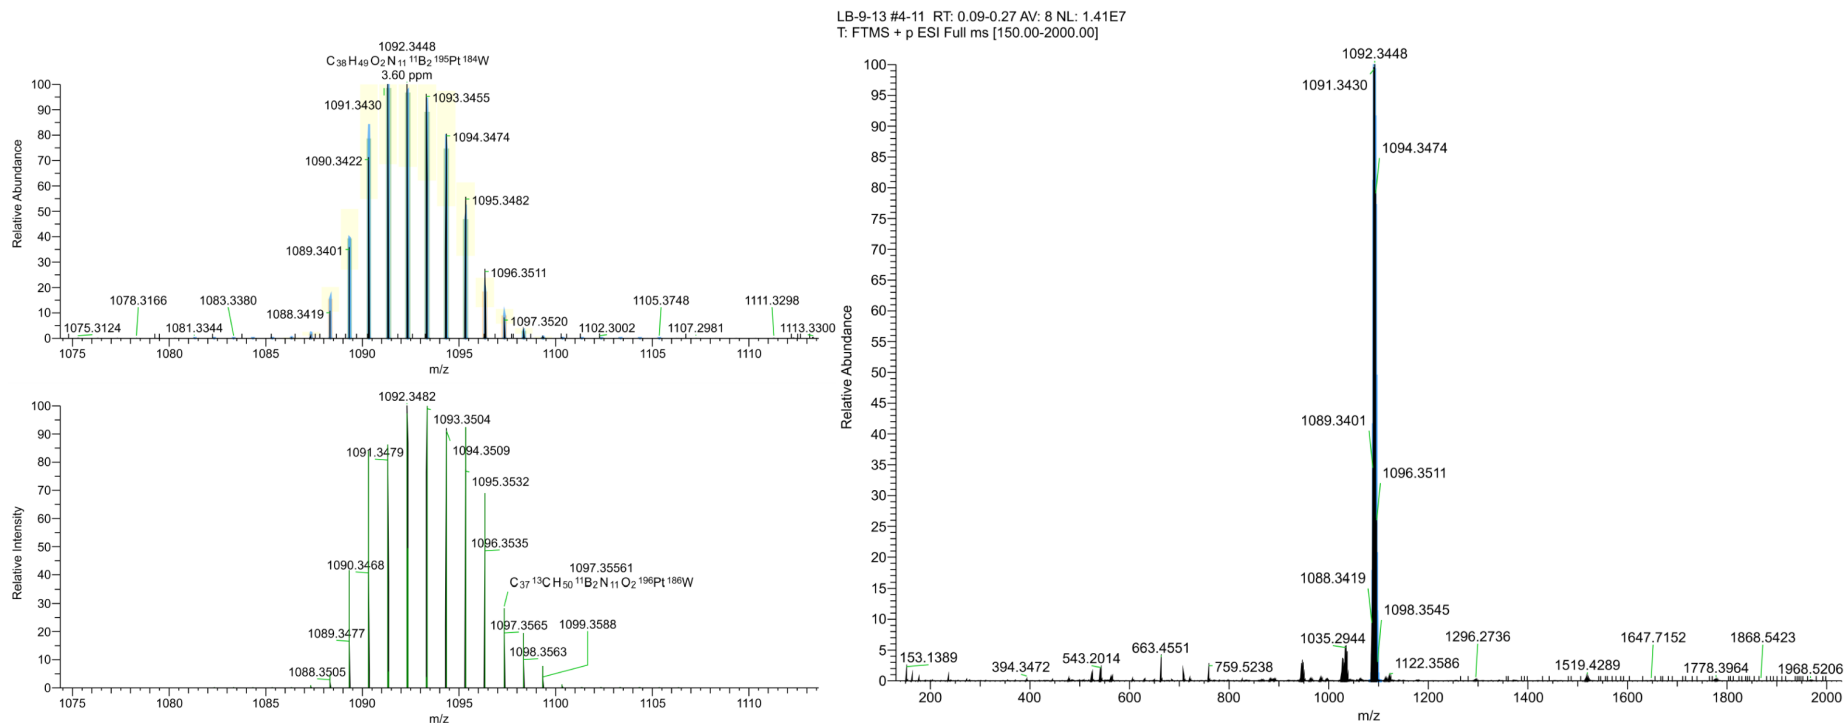

Figure S85: Mass Spectrum of of [WPt( $\mu_2$ -C)(CNC<sub>6</sub>H<sub>2</sub>Me<sub>3</sub>-2,4,6)(CO)<sub>2</sub>(Bp\*)(Tp\*)] (**8a**)



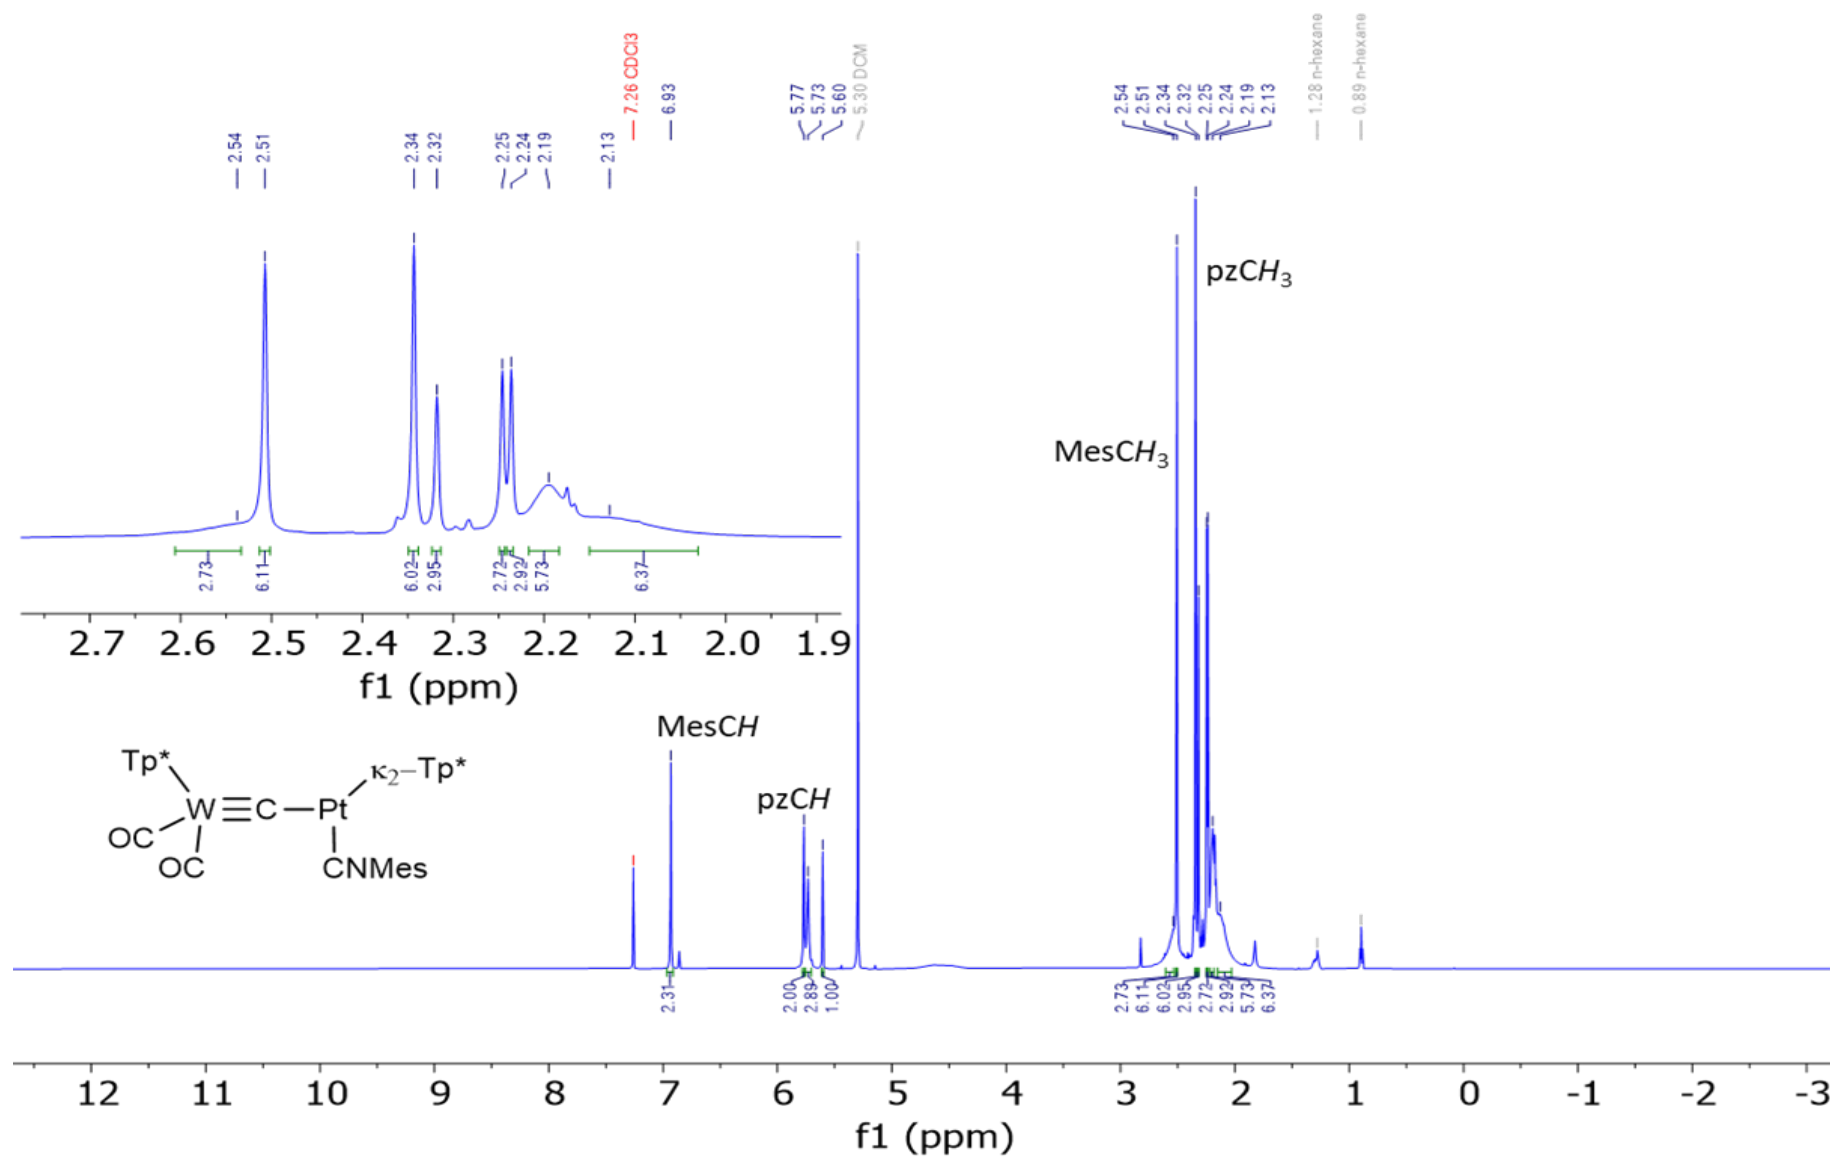

Figure S86:  $^1\text{H}$  NMR Spectrum of  $[\text{WPt}(\mu_2\text{-C})(\text{CNC}_6\text{H}_2\text{Me}_3\text{-}2,3,6)(\text{CO})_2(\text{Tp}^*)_2]$  (**8b**) (600 MHz,  $\text{CDCl}_3$ , 25 °C,  $\delta$ )

## SUPPORTING INFORMATION

## Dalton Transactions

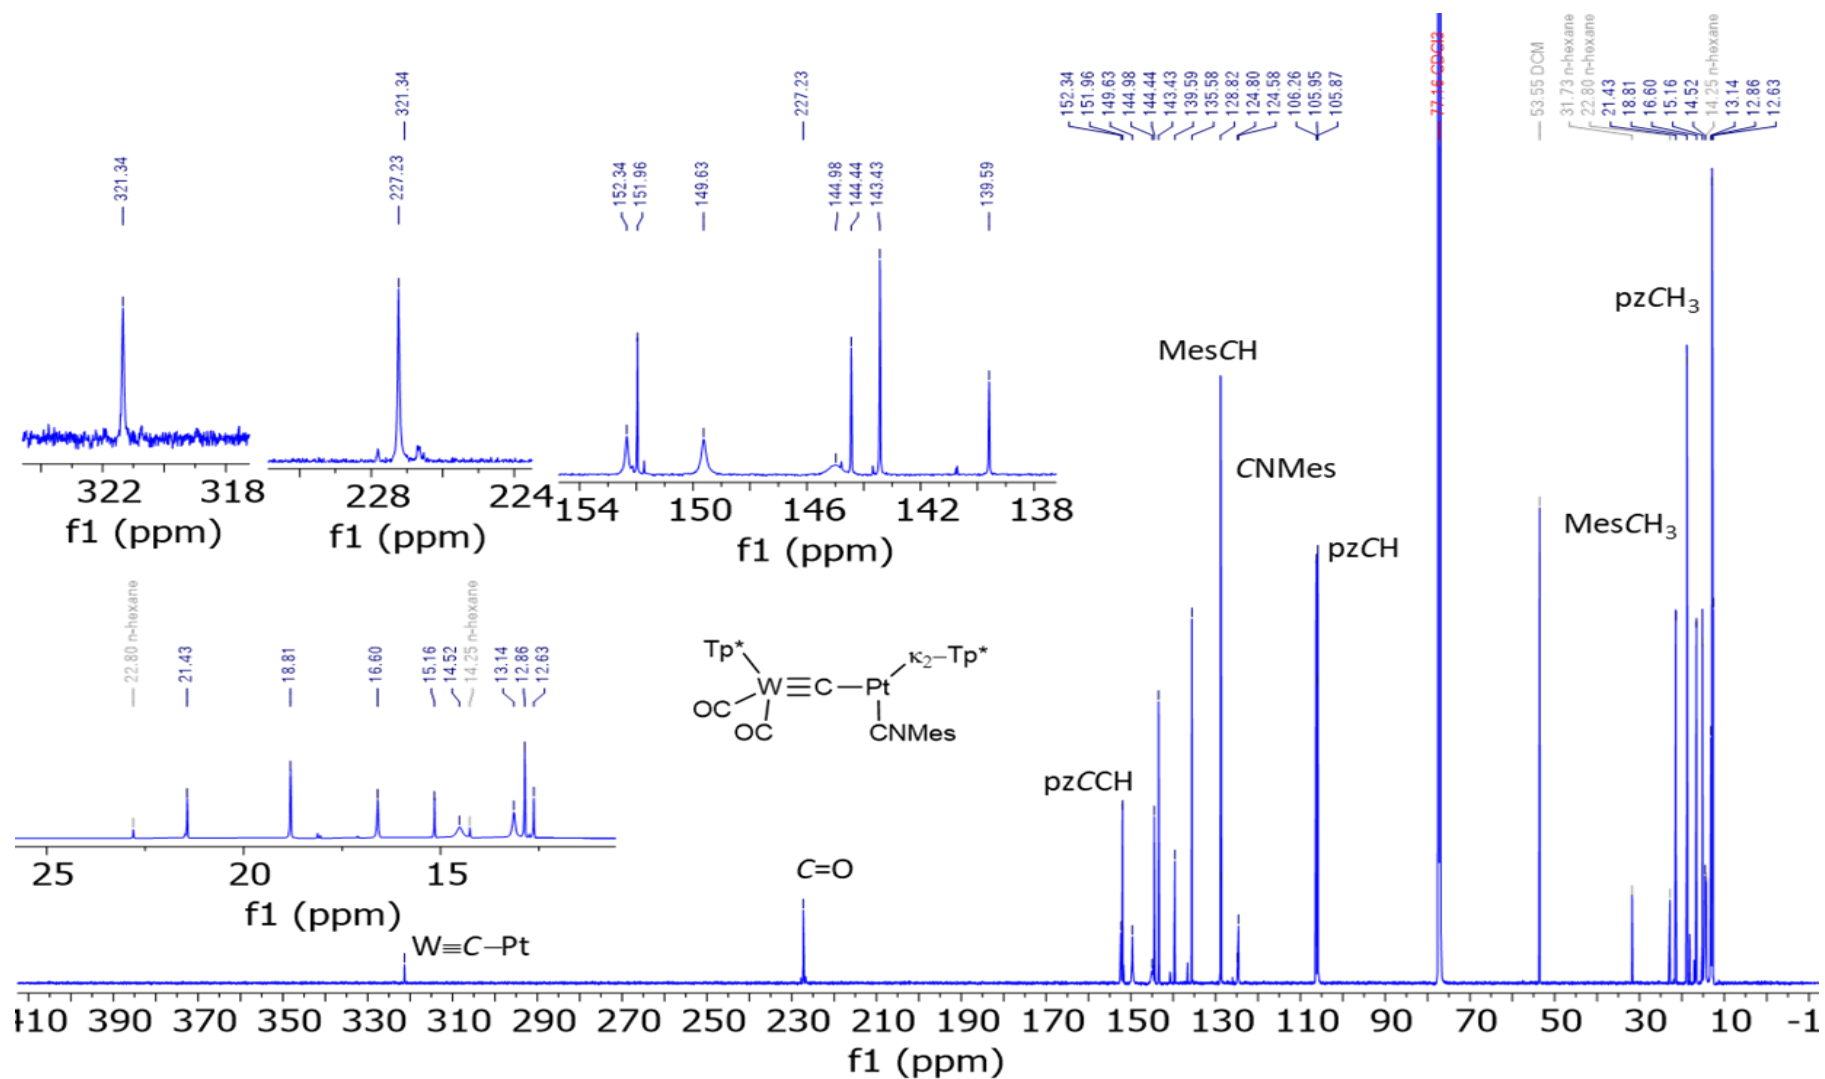

Figure S87:  $^{13}\text{C}$  NMR Spectrum of  $[\text{WPt}(\mu_2\text{-C})(\text{CNC}_6\text{H}_2\text{Me}_3\text{-2,3,6})(\text{CO})_2(\text{Tp}^*)_2]$  (**8b**) (151 MHz,  $\text{CDCl}_3$ , 25 °C,  $\delta$ )

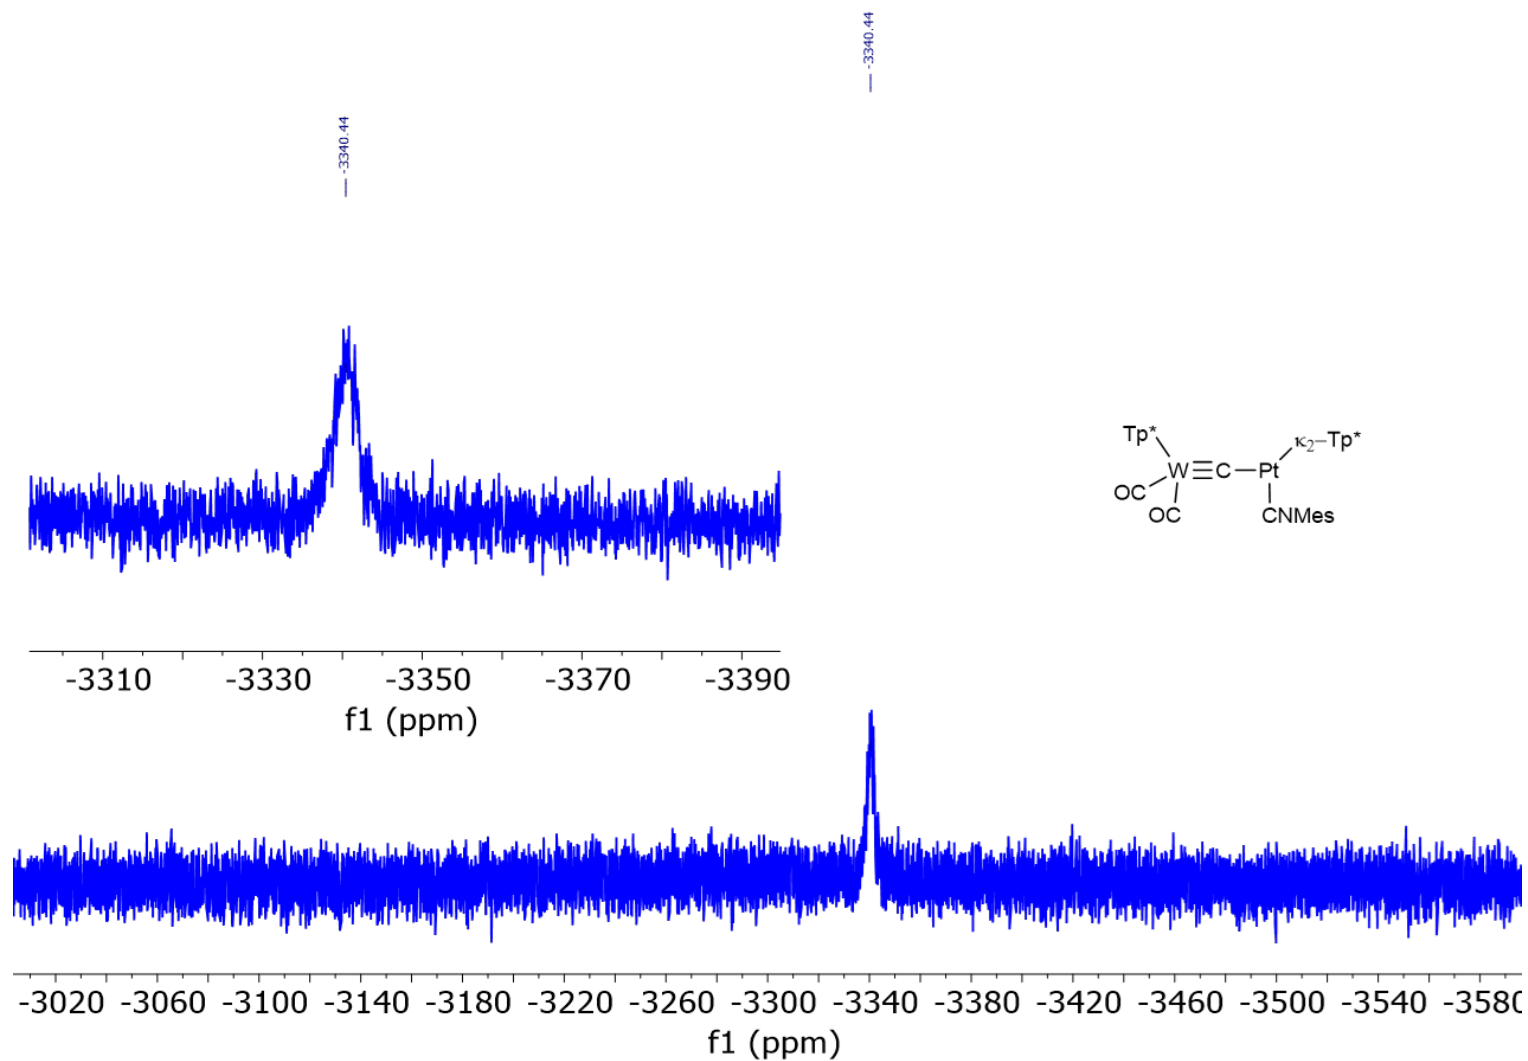

**Figure S88:**  $^{195}\text{Pt}\{^1\text{H}\}$  NMR Spectrum of  $[\text{WPt}(\mu_2\text{-C})(\text{CNC}_6\text{H}_2\text{Me}_3\text{-2,3,6})(\text{CO})_2(\text{Tp}^*)_2]$  (**8b**) (150 MHz,  $\text{CDCl}_3$ , 25 °C,  $\delta$ )

## SUPPORTING INFORMATION

## Dalton Transactions

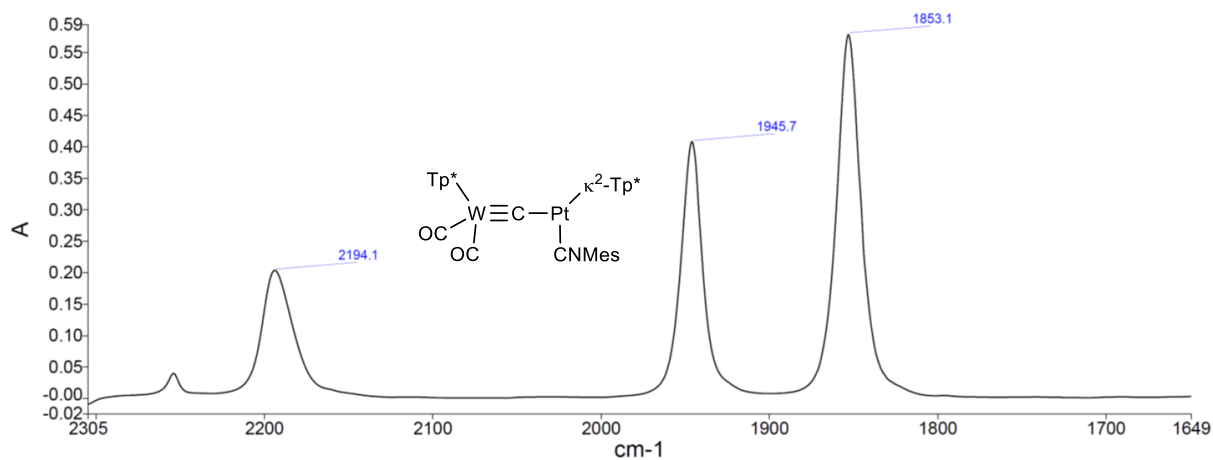

Figure S89: Infrared Spectrum of  $[\text{WPt}(\mu_2\text{-C})(\text{CNC}_6\text{H}_2\text{Me}_3\text{-2,3,6})(\text{CO})_2(\text{Tp}^*)_2]$  (**8b**) ( $\text{CH}_2\text{Cl}_2$ , 25 °C, v)

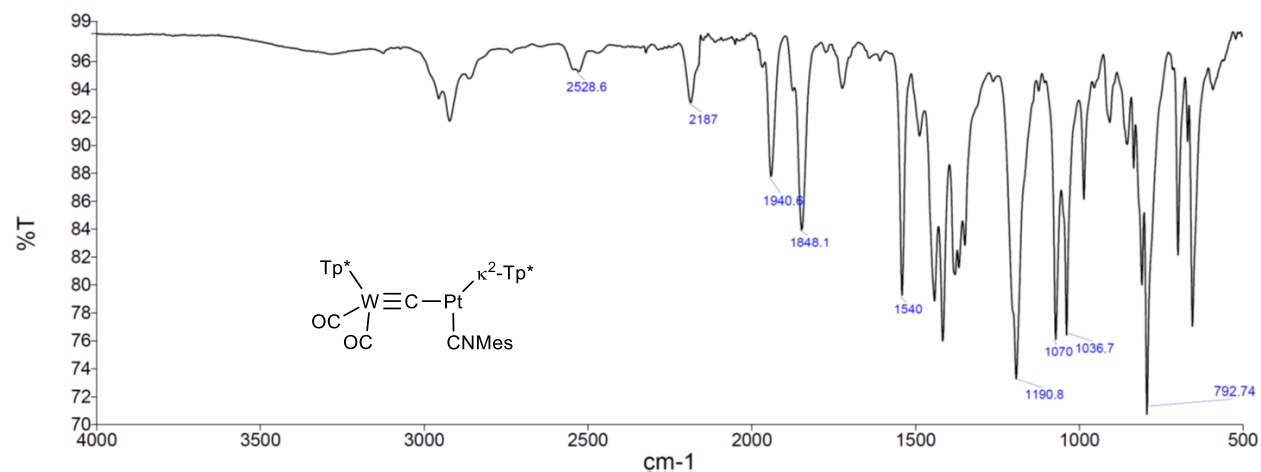

Figure S90: Infrared Spectrum of  $[\text{WPt}(\mu_2\text{-C})(\text{CNC}_6\text{H}_2\text{Me}_3\text{-2,3,6})(\text{CO})_2(\text{Tp}^*)_2]$  (**8b**) (ATR, 25 °C, v)

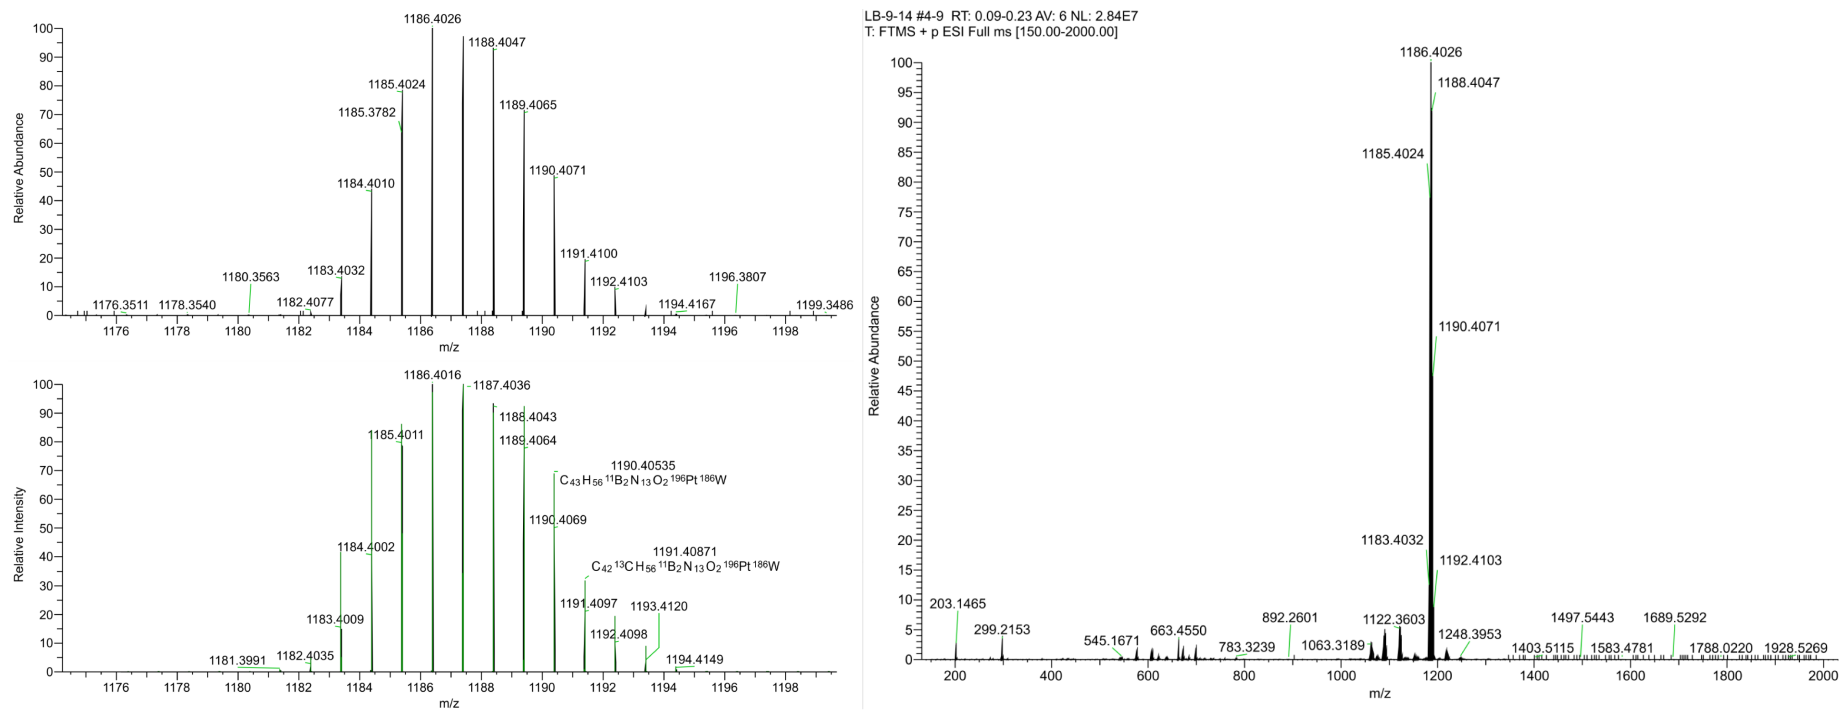

Supplement: d3dt02649c1.pdf [file d3dt02649c1.pdf]
